# Supplementary material
Source: publisher figshare collection journal article supplement (https://gsapubs.figshare.com/ndownloader/files/31185095)
Supplement: Supplementary file 1 [file 31185095]

## Sheet: Supplement_S3
Digital Supplement S4. Ground-truthing dataset for the Geological Map of the Lau Basin.
Cruise ID	Expedition	Vessel	Year	Data Type	Data Collection Method	Collection Method Detail	Sample Site	Sample Name	Latitude	Longitude	Assemblage
7TOW05WT	SEVEN TOW Leg 5	Thomas Washington	1970	Sample	Dredge	Dredge	074D	7TOW05WT-074D	-18.782	-175.98	East Lau Basin
7TOW05WT	SEVEN TOW Leg 5	Thomas Washington	1970	Sample	Dredge	Dredge	079D	7TOW05WT-079D	-17.35	-176.428	Central Lau Basin
7TOW05WT	SEVEN TOW Leg 5	Thomas Washington	1970	Sample	Dredge	Dredge	081D	7TOW05WT-081D	-17.982	-177.698	West Lau Basin
7TOW05WT	SEVEN TOW Leg 5	Thomas Washington	1970	Sample	Dredge	Dredge	086D	7TOW05WT-086D	-16.923	-176.825	Peggy Ridge
7TOW05WT	SEVEN TOW Leg 5	Thomas Washington	1970	Sample	Dredge	Dredge	089D	7TOW05WT-089D	-16.203	-176.257	Zephyr
7TOW05WT	SEVEN TOW Leg 5	Thomas Washington	1970	Sample	Dredge	Dredge	095D	7TOW05WT-095D	-16.393	-177.472	Peggy Ridge
7TOW05WT	SEVEN TOW Leg 5	Thomas Washington	1970	Sample	Dredge	Dredge	098D	7TOW05WT-098D	-15.883	-176.783	Zephyr
7TOW05WT	SEVEN TOW Leg 5	Thomas Washington	1970	Sample	Dredge	Dredge	101D	7TOW05WT-101D	-16.548	-178.442	West Lau Basin
7TOW05WT	SEVEN TOW Leg 5	Thomas Washington	1970	Sample	Dredge	Dredge	103D	7TOW05WT-103D	-15.925	-178.032	Peggy Ridge
7TOW05WT	SEVEN TOW Leg 5	Thomas Washington	1970	Sample	Dredge	Dredge	106D	7TOW05WT-106D	-15.165	-176.628	Southeast Futuna
ALAUFI	ALAUFI	L'Atalante	2000	Sample	Dredge	Dredge	DR01	AL-DR01	-13.9324	-178.803	Futuna
ALAUFI	ALAUFI	L'Atalante	2000	Sample	Dredge	Dredge	DR02	AL-DR02	-14.0217	-178.852	Futuna
ALAUFI	ALAUFI	L'Atalante	2000	Sample	Dredge	Dredge	DR03	AL-DR03	-14.1767	-178.907	Futuna
ALAUFI	ALAUFI	L'Atalante	2000	Sample	Dredge	Dredge	DR04	AL-DR04	-14.25	-178.888	Futuna
ALAUFI	ALAUFI	L'Atalante	2000	Sample	Dredge	Dredge	DR05	AL-DR05	-14.3631	-178.851	Futuna
ALAUFI	ALAUFI	L'Atalante	2000	Sample	Dredge	Dredge	DR06	AL-DR06	-14.47	-178.818	Futuna
ALAUFI	ALAUFI	L'Atalante	2000	Sample	Dredge	Dredge	DR07	AL-DR07	-14.6667	-178.905	Futuna
ALAUFI	ALAUFI	L'Atalante	2000	Sample	Dredge	Dredge	DR08	AL-DR08	-15.5067	-179.352	Futuna
ALAUFI	ALAUFI	L'Atalante	2000	Sample	Dredge	Dredge	DR09	AL-DR09	-15.074	-179.228	Futuna
ALAUFI	ALAUFI	L'Atalante	2000	Sample	Dredge	Dredge	DR10	AL-DR10	-14.9667	-179.125	Futuna
ALAUFI	ALAUFI	L'Atalante	2000	Sample	Dredge	Dredge	DR11	AL-DR11	-14.7483	-179.007	Futuna
ANTP16MV	ANTIPODE Leg 16	Melville	1971	Sample	Dredge	Dredge	221D	ANTP16MV-221D	-21.383	-176.75	West Lau Basin
ANTP16MV	ANTIPODE Leg 16	Melville	1971	Sample	Dredge	Dredge	222D	ANTP16MV-222D	-20.763	-177.193	West Lau Basin
ANTP16MV	ANTIPODE Leg 16	Melville	1971	Sample	Dredge	Dredge	223D	ANTP16MV-223D	-20.393	-176.992	West Lau Basin
ANTP16MV	ANTIPODE Leg 16	Melville	1971	Sample	Dredge	Dredge	224D	ANTP16MV-224D	-19.167	-177.517	West Lau Basin
ANTP16MV	ANTIPODE Leg 16	Melville	1971	Sample	Dredge	Dredge	225D	ANTP16MV-225D	-19.223	-175.752	East Lau Basin
ANTP16MV	ANTIPODE Leg 16	Melville	1971	Sample	Dredge	Dredge	228D	ANTP16MV-228D	-18.177	-174.822	Tofua Arc
ANTP16MV	ANTIPODE Leg 16	Melville	1971	Sample	Dredge	Dredge	229D	ANTP16MV-229D	-17.623	-175.832	East Lau Basin
ANTP16MV	ANTIPODE Leg 16	Melville	1971	Sample	Dredge	Dredge	233D	ANTP16MV-233D	-15.967	-177.133	Zephyr
ANTP16MV	ANTIPODE Leg 16	Melville	1971	Sample	Dredge	Dredge	N/A	ANTP16MV-239D	-13.143	-174.3	Samoa
ANTP16MV	ANTIPODE Leg 16	Melville	1971	Sediment	Sediment core	Gravity core	226G	ANTP16MV-226G	-18.583	-176.75	East Lau Basin
ANTP16MV	ANTIPODE Leg 16	Melville	1971	Sediment	Sediment core	Gravity core	231G	ANTP16MV-231G	-17.158	-175.897	East Lau Basin
ANTP16MV	ANTIPODE Leg 16	Melville	1971	Sediment	Sediment core	Gravity core	238G	ANTP16MV-238G	-14.867	-174.883	North Fonualei
AVON04MV	AVON Leg 4	Melville	1990	Sample	Dredge	Dredge	D100	AVON04MV-100D	-17.7	-172.049	Pacific Seafloor
AVON04MV	AVON Leg 4	Melville	1990	Sample	Dredge	Dredge	D101	AVON04MV-101D	-16.5435	-171.877	Pacific Seafloor
AVON04MV	AVON Leg 4	Melville	1990	Sample	Dredge	Dredge	D102	AVON04MV-102D	-15.493	-171.96	Pacific Seafloor
AVON04MV	AVON Leg 4	Melville	1990	Sample	Dredge	Dredge	D81	AVON04MV-081D	-17.0582	-170.965	Pacific Seafloor
AVON04MV	AVON Leg 4	Melville	1990	Sample	Dredge	Dredge	D82	AVON04MV-082D	-17.0498	-170.967	Pacific Seafloor
AVON04MV	AVON Leg 4	Melville	1990	Sample	Dredge	Dredge	D83	AVON04MV-083D	-19.6	-172.67	Pacific Seafloor
AVON04MV	AVON Leg 4	Melville	1990	Sample	Dredge	Dredge	D84	AVON04MV-084D	-21.1383	-173.232	Pacific Seafloor
AVON04MV	AVON Leg 4	Melville	1990	Sample	Dredge	Dredge	D85	AVON04MV-085D	-22.1	-173.727	Pacific Seafloor
AVON04MV	AVON Leg 4	Melville	1990	Sample	Dredge	Dredge	D86	AVON04MV-086D	-22.1025	-173.726	Pacific Seafloor
AVON04MV	AVON Leg 4	Melville	1990	Sample	Dredge	Dredge	D87	AVON04MV-087D	-22.4483	-173.972	Pacific Seafloor
AVON04MV	AVON Leg 4	Melville	1990	Sample	Dredge	Dredge	D88	AVON04MV-088D	-22.6917	-174.085	Pacific Seafloor
AVON04MV	AVON Leg 4	Melville	1990	Sample	Dredge	Dredge	D89	AVON04MV-089D	-22.8467	-174.14	Pacific Seafloor
AVON04MV	AVON Leg 4	Melville	1990	Sample	Dredge	Dredge	D90	AVON04MV-090D	-23.8332	-174.568	Pacific Seafloor
AVON04MV	AVON Leg 4	Melville	1990	Sample	Dredge	Dredge	D91	AVON04MV-091D	-23.8833	-174.694	Pacific Seafloor
AVON04MV	AVON Leg 4	Melville	1990	Sample	Dredge	Dredge	D92	AVON04MV-092D	-24.6068	-174.887	Pacific Seafloor
BMRG08MV	BOOMERANG Leg 8	Melville	1996	Sample	Dredge	Dredge	D82	BMRG08-D82	-25.8542	-175.42	Tonga Forearc
BMRG08MV	BOOMERANG Leg 8	Melville	1996	Sample	Dredge	Dredge	D83	BMRG08-D83	-23.4388	-174.928	Tonga Forearc
BMRG08MV	BOOMERANG Leg 8	Melville	1996	Sample	Dredge	Dredge	D85	BMRG08-D85	-23.3418	-175.116	Tonga Forearc
BMRG08MV	BOOMERANG Leg 8	Melville	1996	Sample	Dredge	Dredge	D87	BMRG08-D87	-22.36	-174.49	Tonga Forearc
BMRG08MV	BOOMERANG Leg 8	Melville	1996	Sample	Dredge	Dredge	D88	BMRG08-D88	-22.374	-174.557	Tonga Forearc
BMRG08MV	BOOMERANG Leg 8	Melville	1996	Sample	Dredge	Dredge	D89	BMRG08-D89	-21.8395	-173.974	Tonga Forearc
BMRG08MV	BOOMERANG Leg 8	Melville	1996	Sample	Dredge	Dredge	D90	BMRG08-D90	-21.8432	-174.12	Tonga Forearc
BMRG08MV	BOOMERANG Leg 8	Melville	1996	Sample	Dredge	Dredge	D91	BMRG08-D91	-21.863	-174.053	Tonga Forearc
BMRG08MV	BOOMERANG Leg 8	Melville	1996	Sample	Dredge	Dredge	D92	BMRG08-D92	-20.3435	-173.335	Tonga Forearc
BMRG08MV	BOOMERANG Leg 8	Melville	1996	Sample	Dredge	Dredge	D93	BMRG08-D93	-20.3657	-173.399	Tonga Forearc
BMRG08MV	BOOMERANG Leg 8	Melville	1996	Sample	Dredge	Dredge	D94	BMRG08-D94	-20.4888	-173.512	Tonga Forearc
BMRG08MV	BOOMERANG Leg 8	Melville	1996	Sample	Dredge	Dredge	D96	BMRG08-D96	-20	-173.433	Tonga Forearc
BMRG08MV	BOOMERANG Leg 8	Melville	1996	Sample	Dredge	Dredge	D97	BMRG08-D97	-19.3282	-173.154	Tonga Forearc
BMRG08MV	BOOMERANG Leg 8	Melville	1996	Sample	Dredge	Dredge	D98	BMRG08-D98	-19.2532	-172.938	Tonga Forearc
BMRG08MV	BOOMERANG Leg 8	Melville	1996	Sample	Dredge	Dredge	D99	BMRG08-D99	-19.1835	-172.975	Tonga Forearc
BMRG08MV	BOOMERANG Leg 8	Melville	1996	Sample	Dredge	Dredge	D100	BMRG08-D100	-19.0602	-173.042	Tonga Forearc
BMRG08MV	BOOMERANG Leg 8	Melville	1996	Sample	Dredge	Dredge	D101	BMRG08-D101	-18.5282	-172.891	Tonga Forearc
BMRG08MV	BOOMERANG Leg 8	Melville	1996	Sample	Dredge	Dredge	D102	BMRG08-D102	-18.27	-172.83	Tonga Forearc
BMRG08MV	BOOMERANG Leg 8	Melville	1996	Sample	Dredge	Dredge	D104	BMRG08-D104	-17.8682	-172.493	Tonga Forearc
BMRG08MV	BOOMERANG Leg 8	Melville	1996	Sample	Dredge	Dredge	D105	BMRG08-D105	-17.8693	-172.607	Tonga Forearc
BMRG08MV	BOOMERANG Leg 8	Melville	1996	Sample	Dredge	Dredge	D106	BMRG08-D106	-17.4165	-172.409	Tonga Forearc
BMRG08MV	BOOMERANG Leg 8	Melville	1996	Sample	Dredge	Dredge	D107	BMRG08-D107	-16.5232	-172.3	Tonga Forearc
BMRG08MV	BOOMERANG Leg 8	Melville	1996	Sample	Dredge	Dredge	D108	BMRG08-D108	-16.5273	-172.449	Tonga Forearc
BMRG08MV	BOOMERANG Leg 8	Melville	1996	Sample	Dredge	Dredge	D109	BMRG08-D109	-16.5298	-172.657	Tonga Forearc
BMRG08MV	BOOMERANG Leg 8	Melville	1996	Sample	Dredge	Dredge	D110	BMRG08-D110	-15.6828	-172.491	Tonga Forearc
BMRG08MV	BOOMERANG Leg 8	Melville	1996	Sample	Dredge	Dredge	D111	BMRG08-D111	-15.4998	-172.338	Tonga Forearc
BMRG08MV	BOOMERANG Leg 8	Melville	1996	Sample	Dredge	Dredge	D112	BMRG08-D112	-15.4267	-172.667	Tonga Forearc
BMRG08MV	BOOMERANG Leg 8	Melville	1996	Sample	Dredge	Dredge	D113	BMRG08-D113	-14.8113	-173.402	Tonga Forearc
BMRG08MV	BOOMERANG Leg 8	Melville	1996	Sample	Dredge	Dredge	D114	BMRG08-D114	-14.7498	-173.358	Tonga Forearc
BMRG08MV	BOOMERANG Leg 8	Melville	1996	Sample	Dredge	Dredge	D115	BMRG08-D115	-15.3117	-173.458	Tofua Arc
BMRG08MV	BOOMERANG Leg 8	Melville	1996	Sample	Dredge	Dredge	D116	BMRG08-D116	-15.3707	-174.003	Northeast Lau
BMRG08MV	BOOMERANG Leg 8	Melville	1996	Sample	Dredge	Dredge	D117	BMRG08-D117	-15.3683	-173.97	Northeast Lau
BMRG08MV	BOOMERANG Leg 8	Melville	1996	Sample	Dredge	Dredge	D118	BMRG08-D118	-15.063	-173.549	Tofua Arc
BMRG08MV	BOOMERANG Leg 8	Melville	1996	Sample	Dredge	Dredge	D119	BMRG08-D119	-14.9165	-173.839	Tonga Forearc
BMRG08MV	BOOMERANG Leg 8	Melville	1996	Sample	Dredge	Dredge	D120	BMRG08-D120	-14.8632	-173.985	Northeast Lau
CD33	DARWIN 33	Charles Darwin	1988	Sample	Dredge	Dredge	D12	D12	-18.9283	-176.547	Central Lau Basin
CD33	DARWIN 33	Charles Darwin	1988	Sediment	Sediment core	Gravity core	C44	C44	-21.1617	-176.392	East Lau Basin
CD33	DARWIN 33	Charles Darwin	1988	Sediment	Sediment core	Gravity core	C27	C27	-20.3517	-176.202	East Lau Basin
CD33	DARWIN 33	Charles Darwin	1988	Sediment	Sediment core	Gravity core	C40	C40	-19.5833	-176.012	East Lau Basin
CD33	DARWIN 33	Charles Darwin	1988	Sediment	Sediment core	Gravity core	C28	C28	-20.1333	-176.192	East Lau Basin
CD33	DARWIN 33	Charles Darwin	1988	Sediment	Sediment core	Gravity core	C39	C39	-19.2467	-175.903	East Lau Basin
CD33	DARWIN 33	Charles Darwin	1988	Sample	Dredge	Dredge	D16	D16	-18.89	-176.26	East Lau Basin
CD33	DARWIN 33	Charles Darwin	1988	Sample	Dredge	Dredge	D17	D17	-18.8567	-176.31	East Lau Basin
CD33	DARWIN 33	Charles Darwin	1988	Sample	Dredge	Dredge	D19	D19	-19.2847	-176.13	East Lau Basin
CD33	DARWIN 33	Charles Darwin	1988	Sample	Dredge	Dredge	D14	D14	-18.97	-176.533	East Lau Basin
CD33	DARWIN 33	Charles Darwin	1988	Sample	Dredge	Dredge	D41	D41	-19.275	-176.172	East Lau Basin
CD33	DARWIN 33	Charles Darwin	1988	Sediment	Sediment core	Gravity core	C37	C37	-19.3767	-176.007	East Lau Basin
CD33	DARWIN 33	Charles Darwin	1988	Sediment	Sediment core	Gravity core	C29	C29	-20.1333	-176.098	East Lau Basin
CD33	DARWIN 33	Charles Darwin	1988	Sample	Dredge	Dredge	D23	D23	-20.0583	-176.158	East Lau Basin
CD33	DARWIN 33	Charles Darwin	1988	Sample	Dredge	Dredge	D24	D24	-20.0717	-176.098	East Lau Basin
CD33	DARWIN 33	Charles Darwin	1988	Sediment	Sediment core	Gravity core	C36	C36	-19.5182	-175.888	East Lau Basin
CD33	DARWIN 33	Charles Darwin	1988	Sample	Dredge	Dredge	D21	D21	-19.455	-175.927	East Lau Basin
CD33	DARWIN 33	Charles Darwin	1988	Sediment	Sediment core	Gravity core	C26	C26	-20.5933	-176.09	East Lau Basin
CD33	DARWIN 33	Charles Darwin	1988	Sediment	Sediment core	Gravity core	C38	C38	-19.2833	-175.867	East Lau Basin
CD33	DARWIN 33	Charles Darwin	1988	Sediment	Sediment core	Gravity core	C45	C45	-21.3033	-176.267	East Lau Basin
CD33	DARWIN 33	Charles Darwin	1988	Sample	Dredge	Dredge	D22	D22	-19.675	-176.013	East Lau Basin
CD33	DARWIN 33	Charles Darwin	1988	Sample	Dredge	Dredge	D18	D18	-19.07	-176.217	East Lau Basin
CD33	DARWIN 33	Charles Darwin	1988	Sample	Dredge	Dredge	D25	D25	-20.5833	-176.143	East Lau Basin
CD33	DARWIN 33	Charles Darwin	1988	Sample	Dredge	Dredge	D20	D20	-19.475	-175.998	East Lau Basin
CD33	DARWIN 33	Charles Darwin	1988	Sample	Dredge	Dredge	D15	D15	-18.9033	-176.562	Central Lau Basin
CD33	DARWIN 33	Charles Darwin	1988	Sample	Dredge	Dredge	D13	D13	-18.9567	-176.568	Central Lau Basin
CD33	DARWIN 33	Charles Darwin	1988	Sediment	Sediment core	Gravity core	C30	C30	-20.1283	-175.965	East Lau Basin
CD33	DARWIN 33	Charles Darwin	1988	Sediment	Sediment core	Gravity core	C48	C48	-21.3217	-176.502	East Lau Basin
CD33	DARWIN 33	Charles Darwin	1988	Sediment	Sediment core	Gravity core	C50	C50	-21.5487	-176.573	East Lau Basin
CD33	DARWIN 33	Charles Darwin	1988	Sediment	Sediment core	Gravity core	C47	C47	-21.2533	-176.502	East Lau Basin
CD33	DARWIN 33	Charles Darwin	1988	Sediment	Sediment core	Gravity core	C32	C32	-19.8967	-175.955	East Lau Basin
CD33	DARWIN 33	Charles Darwin	1988	Sediment	Sediment core	Gravity core	C33	C33	-19.755	-176.107	East Lau Basin
CD33	DARWIN 33	Charles Darwin	1988	Sediment	Sediment core	Gravity core	C51	C51	-21.7395	-176.367	East Lau Basin
CD33	DARWIN 33	Charles Darwin	1988	Sediment	Sediment core	Gravity core	C49	C49	-21.4317	-176.297	East Lau Basin
CD33	DARWIN 33	Charles Darwin	1988	Sediment	Sediment core	Gravity core	C43	C43	-21.085	-176.2	East Lau Basin
CD33	DARWIN 33	Charles Darwin	1988	Sediment	Sediment core	Gravity core	C35	C35	-19.5808	-176.045	East Lau Basin
CD33	DARWIN 33	Charles Darwin	1988	Sediment	Sediment core	Gravity core	C42	C42	-20.9783	-176.31	East Lau Basin
CD33	DARWIN 33	Charles Darwin	1988	Sediment	Sediment core	Gravity core	C31	C31	-19.9775	-175.148	Tofua Arc
CD33	DARWIN 33	Charles Darwin	1988	Sediment	Sediment core	Gravity core	C46	C46	-21.2715	-176.411	East Lau Basin
CD33	DARWIN 33	Charles Darwin	1988	Sediment	Sediment core	Gravity core	C34	C34	-19.7083	-175.94	East Lau Basin
CHUBACARC	CHUBACARC	L'Atalante	2019	Observation	ROV observation	ROV Viktor 6000	Dive-720-1	Dive-720-1	-20.0549	-176.133	East Lau Basin
CHUBACARC	CHUBACARC	L'Atalante	2019	Observation	ROV observation	ROV Viktor 6000	Dive-721-2	Dive-721-2	-20.3161	-176.137	East Lau Basin
CHUBACARC	CHUBACARC	L'Atalante	2019	Observation	ROV observation	ROV Viktor 6000	Dive-722-3	Dive-722-3	-21.9878	-176.569	East Lau Basin
CHUBACARC	CHUBACARC	L'Atalante	2019	Observation	ROV observation	ROV Viktor 6000	Dive-723-4	Dive-723-4	-20.3177	-176.137	East Lau Basin
CHUBACARC	CHUBACARC	L'Atalante	2019	Observation	ROV observation	ROV Viktor 6000	Dive-725-6	Dive-725-6	-15.4188	-174.679	Mangatolu
CHUBACARC	CHUBACARC	L'Atalante	2019	Observation	ROV observation	ROV Viktor 6000	Dive-726-7	Dive-726-7	-15.4189	-174.657	Mangatolu
CHUBACARC	CHUBACARC	L'Atalante	2019	Observation	ROV observation	ROV Viktor 6000	Dive-727-8	Dive-727-8	-14.7516	-177.155	Southeast Futuna
CHUBACARC	CHUBACARC	L'Atalante	2019	Observation	ROV observation	ROV Viktor 6000	Dive-728-9	Dive-728-9	-14.7604	-177.187	Southeast Futuna
CHUBACARC	CHUBACARC	L'Atalante	2019	Observation	ROV observation	ROV Viktor 6000	Dive-729-10	Dive-729-10	-14.9398	-177.239	Southeast Futuna
CHUBACARC	CHUBACARC	L'Atalante	2019	Observation	ROV observation	ROV Viktor 6000	Dive-730-11	Dive-730-11	-20.3182	-176.14	East Lau Basin
CHUBACARC	CHUBACARC	L'Atalante	2019	Observation	ROV observation	ROV Viktor 6000	Dive-731-12	Dive-731-12	-20.7629	-176.193	East Lau Basin
CHUBACARC	CHUBACARC	L'Atalante	2019	Sample	ROV sample	Grande Boite de collecte	720-1	CHU-PL-01-GBT2	-20.0537	-176.134	East Lau Basin
CHUBACARC	CHUBACARC	L'Atalante	2019	Sample	ROV sample	Grande Boite de collecte	720-1	CHU-PL-01-GBT4	-20.0537	-176.134	East Lau Basin
CHUBACARC	CHUBACARC	L'Atalante	2019	Sample	ROV sample	Grande Boite de collecte	720-1	CHU-PL-01-GBT1	-20.0524	-176.134	East Lau Basin
CHUBACARC	CHUBACARC	L'Atalante	2019	Sample	ROV sample	Panier	720-1	CHU-PL-01-01	-20.053	-176.134	East Lau Basin
CHUBACARC	CHUBACARC	L'Atalante	2019	Sample	ROV sample	Panier	720-1	CHU-PL-01-02	-20.0525	-176.134	East Lau Basin
CHUBACARC	CHUBACARC	L'Atalante	2019	Sample	ROV sample	Grande Boite de collecte	721-2	CHU-PL-02-GBT3	-20.3166	-176.136	East Lau Basin
CHUBACARC	CHUBACARC	L'Atalante	2019	Sample	ROV sample	Panier	721-2	CHU-PL-02-01	-20.3166	-176.136	East Lau Basin
CHUBACARC	CHUBACARC	L'Atalante	2019	Sample	ROV sample	Grande Boite de collecte	721-2	CHU-PL-02-GBT4	-20.3166	-176.136	East Lau Basin
CHUBACARC	CHUBACARC	L'Atalante	2019	Sample	ROV sample	Panier	722-3	CHU-PL-03-01	-21.9896	-176.568	East Lau Basin
CHUBACARC	CHUBACARC	L'Atalante	2019	Sample	ROV sample	Grande Boite de collecte	722-3	CHU-PL-03-GBT4	-21.988	-176.568	East Lau Basin
CHUBACARC	CHUBACARC	L'Atalante	2019	Sample	ROV sample	Panier	722-3	CHU-PL-03-02	-21.9902	-176.569	East Lau Basin
CHUBACARC	CHUBACARC	L'Atalante	2019	Sample	ROV sample	Grande Boite de collecte	722-3	CHU-PL-03-GBT2	-21.9892	-176.568	East Lau Basin
CHUBACARC	CHUBACARC	L'Atalante	2019	Sample	ROV sample	Panier	722-3	CHU-PL-03-03	-21.9892	-176.568	East Lau Basin
CHUBACARC	CHUBACARC	L'Atalante	2019	Sample	ROV sample	Panier	722-3	CHU-PL-03-04	-21.9908	-176.569	East Lau Basin
CHUBACARC	CHUBACARC	L'Atalante	2019	Sample	ROV sample	Petite Boite de collecte	722-3	CHU-PL-03-PBT3	-21.9909	-176.569	East Lau Basin
CHUBACARC	CHUBACARC	L'Atalante	2019	Sample	ROV sample	Grande Boite de collecte	722-3	CHU-PL-03-GBT5	-21.9893	-176.568	East Lau Basin
CHUBACARC	CHUBACARC	L'Atalante	2019	Sample	ROV sample	Panier	722-3	CHU-PL-03-05	-21.9897	-176.568	East Lau Basin
CHUBACARC	CHUBACARC	L'Atalante	2019	Sample	ROV sample	Panier	722-3	CHU-PL-03-06	-21.9904	-176.568	East Lau Basin
CHUBACARC	CHUBACARC	L'Atalante	2019	Sample	ROV sample	Panier	722-3	CHU-PL-03-07	-21.9894	-176.569	East Lau Basin
CHUBACARC	CHUBACARC	L'Atalante	2019	Sample	ROV sample	Panier	722-3	CHU-PL-03-08	-21.9903	-176.568	East Lau Basin
CHUBACARC	CHUBACARC	L'Atalante	2019	Sample	ROV sample	Panier	723-4	CHU-PL-04-01	-20.3163	-176.137	East Lau Basin
CHUBACARC	CHUBACARC	L'Atalante	2019	Sample	ROV sample	Panier	723-4	CHU-PL-04-02	-20.3179	-176.137	East Lau Basin
CHUBACARC	CHUBACARC	L'Atalante	2019	Sample	ROV sample	Panier	723-4	CHU-PL-04-03	-20.3176	-176.137	East Lau Basin
CHUBACARC	CHUBACARC	L'Atalante	2019	Sample	ROV sample	Grande Boite de collecte	725-6	CHU-PL-06-GBT4	-15.4073	-174.663	Mangatolu
CHUBACARC	CHUBACARC	L'Atalante	2019	Sample	ROV sample	Panier	726-7	CHU-PL-07-01	-15.4161	-174.656	Mangatolu
CHUBACARC	CHUBACARC	L'Atalante	2019	Sample	ROV sample	Grande Boite de collecte	726-7	CHU-PL-07-GBT3	-15.4145	-174.653	Mangatolu
CHUBACARC	CHUBACARC	L'Atalante	2019	Sample	ROV sample	Panier	726-7	CHU-PL-07-02	-15.4145	-174.653	Mangatolu
CHUBACARC	CHUBACARC	L'Atalante	2019	Sample	ROV sample	Panier	726-7	CHU-PL-07-03	-15.416	-174.655	Mangatolu
CHUBACARC	CHUBACARC	L'Atalante	2019	Sample	ROV sample	Panier	726-7	CHU-PL-07-04	-15.4146	-174.653	Mangatolu
CHUBACARC	CHUBACARC	L'Atalante	2019	Sample	ROV sample	Grande Boite de collecte	726-7	CHU-PL-07-PBT3	-15.4146	-174.653	Mangatolu
CHUBACARC	CHUBACARC	L'Atalante	2019	Sample	ROV sample	Panier	727-8	CHU-PL-08-01	-14.7525	-177.154	Southeast Futuna
CHUBACARC	CHUBACARC	L'Atalante	2019	Sample	ROV sample	Carottier lame (BLADE CORE)	727-8	CHU-PL-08-CL6	-14.7517	-177.155	Southeast Futuna
CHUBACARC	CHUBACARC	L'Atalante	2019	Sample	ROV sample	Panier	727-8	CHU-PL-08-02	-14.752	-177.155	Southeast Futuna
CHUBACARC	CHUBACARC	L'Atalante	2019	Sample	ROV sample	Panier	727-8	CHU-PL-08-03	-14.752	-177.155	Southeast Futuna
CHUBACARC	CHUBACARC	L'Atalante	2019	Sample	ROV sample	Panier	727-8	CHU-PL-08-04	-14.752	-177.155	Southeast Futuna
CHUBACARC	CHUBACARC	L'Atalante	2019	Sample	ROV sample	Panier	727-8	CHU-PL-08-05	-14.7558	-177.156	Southeast Futuna
CHUBACARC	CHUBACARC	L'Atalante	2019	Sample	ROV sample	Panier	727-8	CHU-PL-08-06	-14.7558	-177.156	Southeast Futuna
CHUBACARC	CHUBACARC	L'Atalante	2019	Sample	ROV sample	Panier	727-8	CHU-PL-08-07	-14.7571	-177.156	Southeast Futuna
CHUBACARC	CHUBACARC	L'Atalante	2019	Sample	ROV sample	Grande Boite de collecte	727-8	CHU-PL-08-GBT5	-14.7374	-177.166	Southeast Futuna
CHUBACARC	CHUBACARC	L'Atalante	2019	Sample	ROV sample	Panier	727-8	CHU-PL-08-08	-14.7374	-177.166	Southeast Futuna
CHUBACARC	CHUBACARC	L'Atalante	2019	Sample	ROV sample	Grande Boite de collecte	727-8	CHU-PL-08-GBT6	-14.7372	-177.166	Southeast Futuna
CHUBACARC	CHUBACARC	L'Atalante	2019	Sample	ROV sample	Panier	727-8	CHU-PL-08-10	-14.7499	-177.151	Southeast Futuna
CHUBACARC	CHUBACARC	L'Atalante	2019	Sample	ROV sample	Panier	727-8	CHU-PL-08-09	-14.7519	-177.152	Southeast Futuna
CHUBACARC	CHUBACARC	L'Atalante	2019	Sample	ROV sample	Panier	728-9	CHU-PL-09-01	-14.7598	-177.184	Southeast Futuna
CHUBACARC	CHUBACARC	L'Atalante	2019	Sample	ROV sample	Panier	728-9	CHU-PL-09-02	-14.76	-177.185	Southeast Futuna
CHUBACARC	CHUBACARC	L'Atalante	2019	Sample	ROV sample	Petite Boite de collecte	728-9	CHU-PL-09-PBT7	-14.7653	-177.188	Southeast Futuna
CHUBACARC	CHUBACARC	L'Atalante	2019	Sample	ROV sample	Panier	728-9	CHU-PL-09-03	-14.7653	-177.188	Southeast Futuna
CHUBACARC	CHUBACARC	L'Atalante	2019	Sample	ROV sample	Panier	728-9	CHU-PL-09-04	-14.7583	-177.188	Southeast Futuna
CHUBACARC	CHUBACARC	L'Atalante	2019	Sample	ROV sample	Panier	728-9	CHU-PL-09-05	-14.7566	-177.184	Southeast Futuna
CHUBACARC	CHUBACARC	L'Atalante	2019	Sample	ROV sample	Petite Boite de collecte	728-9	CHU-PL-09-PBT4	-14.7598	-177.185	Southeast Futuna
CHUBACARC	CHUBACARC	L'Atalante	2019	Sample	ROV sample	Panier	728-9	CHU-PL-09-06	-14.76	-177.185	Southeast Futuna
CHUBACARC	CHUBACARC	L'Atalante	2019	Sample	ROV sample	Grande Boite de collecte	728-9	CHU-PL-09-GBT7	-14.7595	-177.183	Southeast Futuna
CHUBACARC	CHUBACARC	L'Atalante	2019	Sample	ROV sample	Panier	728-9	CHU-PL-09-07	-14.7595	-177.183	Southeast Futuna
CHUBACARC	CHUBACARC	L'Atalante	2019	Sample	ROV sample	Panier	729-10	CHU-PL-10-02	-14.9423	-177.25	Southeast Futuna
CHUBACARC	CHUBACARC	L'Atalante	2019	Sample	ROV sample	Panier	729-10	CHU-PL-10-03	-14.9458	-177.254	Southeast Futuna
CHUBACARC	CHUBACARC	L'Atalante	2019	Sample	ROV sample	Panier	729-10	CHU-PL-10-04	-14.9411	-177.259	Southeast Futuna
CHUBACARC	CHUBACARC	L'Atalante	2019	Sample	ROV sample	Panier	729-10	CHU-PL-10-05	-14.9398	-177.259	Southeast Futuna
CHUBACARC	CHUBACARC	L'Atalante	2019	Sample	ROV sample	Panier	729-10	CHU-PL-10-06	-14.9398	-177.259	Southeast Futuna
CHUBACARC	CHUBACARC	L'Atalante	2019	Sample	ROV sample	Grande Boite de collecte	729-10	CHU-PL-10-GBT4	-14.9159	-177.234	Southeast Futuna
CHUBACARC	CHUBACARC	L'Atalante	2019	Sample	ROV sample	Panier	729-10	CHU-PL-10-07	-14.9299	-177.22	Southeast Futuna
CHUBACARC	CHUBACARC	L'Atalante	2019	Sample	ROV sample	Panier	731-12	CHU-PL-12-01	-20.7611	-176.191	East Lau Basin
CHUBACARC	CHUBACARC	L'Atalante	2019	Sample	ROV sample	Panier	731-12	CHU-PL-12-02	-20.7631	-176.191	East Lau Basin
DSDP203	DSDP203	Glomar Challenger	1973	Drill_hole	DSDP	Drill hole	203	21-203	-22.1537	-177.546	West Lau Basin
DSDP204	DSDP204	Glomar Challenger	1973	Drill_hole	DSDP	Drill hole	204	21-204	-24.9545	-174.112	Pacific Seafloor
DSDP204	DSDP204	Glomar Challenger	1973	Drill_hole	DSDP	Drill hole	204A	21-204A	-24.9545	-174.112	Pacific Seafloor
DSDP205	DSDP205	Glomar Challenger	1973	Drill_hole	DSDP	Drill hole	205	21-205	-25.5165	177.899	South Fiji
FK160320	Virtual Vents: The Changing Face of Hydrothermalism Revealed	Falkor	2016	Observation	ROV observation	ROV ROPOS	R1916	R1916	-15.1649	-173.576	Tofua Arc
FK160320	Virtual Vents: The Changing Face of Hydrothermalism Revealed	Falkor	2016	Observation	ROV observation	ROV ROPOS	R1917	R1917	-15.1657	-173.576	Tofua Arc
FK160320	Virtual Vents: The Changing Face of Hydrothermalism Revealed	Falkor	2016	Observation	ROV observation	ROV ROPOS	R1918	R1918	-15.1629	-173.575	Tofua Arc
FK160320	Virtual Vents: The Changing Face of Hydrothermalism Revealed	Falkor	2016	Observation	ROV observation	ROV ROPOS	R1919	R1919	-15.1645	-173.574	Tofua Arc
FK160320	Virtual Vents: The Changing Face of Hydrothermalism Revealed	Falkor	2016	Observation	ROV observation	ROV ROPOS	R1920	R1920	-15.1657	-173.574	Tofua Arc
FK160320	Virtual Vents: The Changing Face of Hydrothermalism Revealed	Falkor	2016	Observation	ROV observation	ROV ROPOS	R1921	R1921	-15.1658	-173.577	Tofua Arc
FK160320	Virtual Vents: The Changing Face of Hydrothermalism Revealed	Falkor	2016	Sample	ROV sample	ROV ROPOS	R1918	D1918-R1	-15.1629	-173.575	Tofua Arc
FK160320	Virtual Vents: The Changing Face of Hydrothermalism Revealed	Falkor	2016	Sample	ROV sample	ROV ROPOS	R1918	D1918-R2	-15.1632	-173.575	Tofua Arc
FK160320	Virtual Vents: The Changing Face of Hydrothermalism Revealed	Falkor	2016	Sample	ROV sample	ROV ROPOS	R1918	D1918-R3	-15.1632	-173.575	Tofua Arc
FK160320	Virtual Vents: The Changing Face of Hydrothermalism Revealed	Falkor	2016	Sample	ROV sample	ROV ROPOS	R1918	D1918-R4	-15.1632	-173.575	Tofua Arc
FK160320	Virtual Vents: The Changing Face of Hydrothermalism Revealed	Falkor	2016	Sample	ROV sample	ROV ROPOS	R1918	D1918-R5	-15.1629	-173.575	Tofua Arc
FK160320	Virtual Vents: The Changing Face of Hydrothermalism Revealed	Falkor	2016	Sample	ROV sample	ROV ROPOS	R1918	D1918-R6	-15.1629	-173.575	Tofua Arc
FK160320	Virtual Vents: The Changing Face of Hydrothermalism Revealed	Falkor	2016	Sample	ROV sample	ROV ROPOS	R1918	D1918-R7	-15.1629	-173.575	Tofua Arc
FK160320	Virtual Vents: The Changing Face of Hydrothermalism Revealed	Falkor	2016	Sample	ROV sample	ROV ROPOS	R1918	D1918-R8	-15.1629	-173.575	Tofua Arc
FK160320	Virtual Vents: The Changing Face of Hydrothermalism Revealed	Falkor	2016	Sample	ROV sample	ROV ROPOS	R1918	D1918-R9	-15.1628	-173.575	Tofua Arc
FK160320	Virtual Vents: The Changing Face of Hydrothermalism Revealed	Falkor	2016	Sample	ROV sample	ROV ROPOS	R1918	D1918-R10	-15.1631	-173.575	Tofua Arc
FK160320	Virtual Vents: The Changing Face of Hydrothermalism Revealed	Falkor	2016	Sample	ROV sample	ROV ROPOS	R1918	D1918-R11	-15.1628	-173.575	Tofua Arc
FK160320	Virtual Vents: The Changing Face of Hydrothermalism Revealed	Falkor	2016	Sample	ROV sample	ROV ROPOS	R1918	D1918-R12	-15.1629	-173.575	Tofua Arc
FK160320	Virtual Vents: The Changing Face of Hydrothermalism Revealed	Falkor	2016	Sample	ROV sample	ROV ROPOS	R1918	D1918-R13	-15.1629	-173.575	Tofua Arc
FK160320	Virtual Vents: The Changing Face of Hydrothermalism Revealed	Falkor	2016	Sample	ROV sample	ROV ROPOS	R1919	D1919-R1	-15.1642	-173.574	Tofua Arc
FK160320	Virtual Vents: The Changing Face of Hydrothermalism Revealed	Falkor	2016	Sample	ROV sample	ROV ROPOS	R1919	D1919-R2	-15.1646	-173.574	Tofua Arc
FK160320	Virtual Vents: The Changing Face of Hydrothermalism Revealed	Falkor	2016	Sample	ROV sample	ROV ROPOS	R1919	D1919-R3	-15.1648	-173.574	Tofua Arc
FK160320	Virtual Vents: The Changing Face of Hydrothermalism Revealed	Falkor	2016	Sample	ROV sample	ROV ROPOS	R1919	D1919-R4	-15.1647	-173.574	Tofua Arc
FK160320	Virtual Vents: The Changing Face of Hydrothermalism Revealed	Falkor	2016	Sample	ROV sample	ROV ROPOS	R1919	D1919-R5	-15.1647	-173.574	Tofua Arc
FK160320	Virtual Vents: The Changing Face of Hydrothermalism Revealed	Falkor	2016	Sample	ROV sample	ROV ROPOS	R1919	D1919-R6	-15.1648	-173.574	Tofua Arc
FK160320	Virtual Vents: The Changing Face of Hydrothermalism Revealed	Falkor	2016	Sample	ROV sample	ROV ROPOS	R1920	D1920-R1	-15.1655	-173.574	Tofua Arc
FK160320	Virtual Vents: The Changing Face of Hydrothermalism Revealed	Falkor	2016	Sample	ROV sample	ROV ROPOS	R1920	D1920-R2	-15.1655	-173.574	Tofua Arc
FK160320	Virtual Vents: The Changing Face of Hydrothermalism Revealed	Falkor	2016	Sample	ROV sample	ROV ROPOS	R1920	D1920-R3	-15.1654	-173.574	Tofua Arc
FK160320	Virtual Vents: The Changing Face of Hydrothermalism Revealed	Falkor	2016	Sample	ROV sample	ROV ROPOS	R1920	D1920-R4	-15.1654	-173.574	Tofua Arc
FK160320	Virtual Vents: The Changing Face of Hydrothermalism Revealed	Falkor	2016	Sample	ROV sample	ROV ROPOS	R1920	D1920-R5	-15.1654	-173.574	Tofua Arc
FK160320	Virtual Vents: The Changing Face of Hydrothermalism Revealed	Falkor	2016	Sample	ROV sample	ROV ROPOS	R1920	D1920-R6	-15.1653	-173.574	Tofua Arc
FK160320	Virtual Vents: The Changing Face of Hydrothermalism Revealed	Falkor	2016	Sample	ROV sample	ROV ROPOS	R1920	D1920-R7	-15.1652	-173.575	Tofua Arc
FK160320	Virtual Vents: The Changing Face of Hydrothermalism Revealed	Falkor	2016	Sample	ROV sample	ROV ROPOS	R1920	D1920-R8	-15.1652	-173.575	Tofua Arc
FK160320	Virtual Vents: The Changing Face of Hydrothermalism Revealed	Falkor	2016	Sample	ROV sample	ROV ROPOS	R1920	D1920-Sed	-15.1652	-173.575	Tofua Arc
FK160320	Virtual Vents: The Changing Face of Hydrothermalism Revealed	Falkor	2016	Sample	ROV sample	ROV ROPOS	R1920	D1920-R9	-15.1649	-173.575	Tofua Arc
FK160320	Virtual Vents: The Changing Face of Hydrothermalism Revealed	Falkor	2016	Sample	ROV sample	ROV ROPOS	R1920	D1920-R10	-15.165	-173.575	Tofua Arc
FK160320	Virtual Vents: The Changing Face of Hydrothermalism Revealed	Falkor	2016	Sample	ROV sample	ROV ROPOS	R1920	D1920-R11	-15.1646	-173.575	Tofua Arc
FK160320	Virtual Vents: The Changing Face of Hydrothermalism Revealed	Falkor	2016	Sample	ROV sample	ROV ROPOS	R1920	D1920-R12	-15.1647	-173.575	Tofua Arc
FK160320	Virtual Vents: The Changing Face of Hydrothermalism Revealed	Falkor	2016	Sample	ROV sample	ROV ROPOS	R1920	D1920-R13	-15.1648	-173.574	Tofua Arc
FK160320	Virtual Vents: The Changing Face of Hydrothermalism Revealed	Falkor	2016	Sample	ROV sample	ROV ROPOS	R1920	D1920-R14	-15.1652	-173.573	Tofua Arc
FK160320	Virtual Vents: The Changing Face of Hydrothermalism Revealed	Falkor	2016	Sample	ROV sample	ROV ROPOS	R1920	D1920-R15	-15.1649	-173.573	Tofua Arc
FK160407	Ecosystem Dynamics of Hydrothermal Vent Communities	Falkor	2016	Observation	ROV observation	ROV ROPOS	R1924	R1924	-21.9897	-176.568	East Lau Basin
FK160407	Ecosystem Dynamics of Hydrothermal Vent Communities	Falkor	2016	Observation	ROV observation	ROV ROPOS	R1926	R1926	-21.9897	-176.568	East Lau Basin
FK160407	Ecosystem Dynamics of Hydrothermal Vent Communities	Falkor	2016	Observation	ROV observation	ROV ROPOS	R1928	R1928	-21.9897	-176.568	East Lau Basin
FK160407	Ecosystem Dynamics of Hydrothermal Vent Communities	Falkor	2016	Observation	ROV observation	ROV ROPOS	R1930	R1930	-21.9905	-176.569	East Lau Basin
FK160407	Ecosystem Dynamics of Hydrothermal Vent Communities	Falkor	2016	Observation	ROV observation	ROV ROPOS	R1933	R1933	-20.3167	-176.136	East Lau Basin
FK160407	Ecosystem Dynamics of Hydrothermal Vent Communities	Falkor	2016	Observation	ROV observation	ROV ROPOS	R1932	R1932	-20.6739	-176.18	East Lau Basin
FK160407	Ecosystem Dynamics of Hydrothermal Vent Communities	Falkor	2016	Observation	ROV observation	ROV ROPOS	R1934	R1934	-20.6815	-176.182	East Lau Basin
FK160407	Ecosystem Dynamics of Hydrothermal Vent Communities	Falkor	2016	Observation	ROV observation	ROV ROPOS	R1935	R1935	-20.6815	-176.182	East Lau Basin
FK160407	Ecosystem Dynamics of Hydrothermal Vent Communities	Falkor	2016	Observation	ROV observation	ROV ROPOS	R1929	R1929	-22.1804	-176.601	East Lau Basin
FK160407	Ecosystem Dynamics of Hydrothermal Vent Communities	Falkor	2016	Observation	ROV observation	ROV ROPOS	R1923	R1923	-21.9887	-176.567	East Lau Basin
FK160407	Ecosystem Dynamics of Hydrothermal Vent Communities	Falkor	2016	Observation	ROV observation	ROV ROPOS	R1925	R1925	-21.9887	-176.567	East Lau Basin
FK160407	Ecosystem Dynamics of Hydrothermal Vent Communities	Falkor	2016	Observation	ROV observation	ROV ROPOS	R1927	R1927	-21.9887	-176.567	East Lau Basin
FK160407	Ecosystem Dynamics of Hydrothermal Vent Communities	Falkor	2016	Observation	ROV observation	ROV ROPOS	R1922	R1922	-20.7664	-176.193	East Lau Basin
FK160407	Ecosystem Dynamics of Hydrothermal Vent Communities	Falkor	2016	Observation	ROV observation	ROV ROPOS	R1931	R1931	-20.7612	-176.191	East Lau Basin
FK171110	Underwater Fire	Falkor	2017	Sample	ROV sample	ROV grab	S103	S103-rock-01	-15.0883	-173.737	Tonga Forearc
FK171110	Underwater Fire	Falkor	2017	Sample	ROV sample	ROV grab	S103	S103-rock-04	-15.0879	-173.738	Tonga Forearc
FK171110	Underwater Fire	Falkor	2017	Sample	ROV sample	ROV grab	S103	S103-rock-05	-15.0885	-173.738	Tonga Forearc
FK171110	Underwater Fire	Falkor	2017	Sample	ROV sample	ROV grab	S103	S103-rock-07	-15.0886	-173.739	Tonga Forearc
FK171110	Underwater Fire	Falkor	2017	Sample	ROV sample	ROV grab	S103	S103-rock-11	-15.0892	-173.74	Tonga Forearc
FK171110	Underwater Fire	Falkor	2017	Sample	ROV sample	ROV grab	S103	S103-rock-12	-15.0899	-173.74	Tonga Forearc
FK171110	Underwater Fire	Falkor	2017	Sample	ROV sample	ROV grab	S103	S103-rock-13	-15.0898	-173.741	Tonga Forearc
FK171110	Underwater Fire	Falkor	2017	Sample	ROV sample	ROV grab	S103	S103-rock-15	-15.0881	-173.744	Tonga Forearc
FK171110	Underwater Fire	Falkor	2017	Sample	ROV sample	ROV grab	S103	S103-rock-16	-15.0889	-173.744	Tonga Forearc
FK171110	Underwater Fire	Falkor	2017	Sample	ROV sample	ROV grab	S103	S103-rock-17	-15.0899	-173.745	Tonga Forearc
FK171110	Underwater Fire	Falkor	2017	Sample	ROV sample	ROV grab	S103	S103-rock-18	-15.0909	-173.745	Tonga Forearc
FK171110	Underwater Fire	Falkor	2017	Sample	ROV sample	ROV grab	S103	S103-rock-20	-15.0918	-173.745	Tonga Forearc
FK171110	Underwater Fire	Falkor	2017	Sample	ROV sample	ROV grab	S103	S103-rock-22	-15.0929	-173.746	Tonga Forearc
FK171110	Underwater Fire	Falkor	2017	Sample	ROV sample	ROV grab	S103	S103-rock-24	-15.0933	-173.746	Tonga Forearc
FK171110	Underwater Fire	Falkor	2017	Sample	ROV sample	ROV grab	S86	S86-rock-01	-15.0902	-173.734	Tonga Forearc
FK171110	Underwater Fire	Falkor	2017	Sample	ROV sample	ROV grab	S86	S86-rock-02	-15.0899	-173.734	Tonga Forearc
FK171110	Underwater Fire	Falkor	2017	Sample	ROV sample	ROV grab	S86	S86-Rock-04	-15.0901	-173.737	Tonga Forearc
FK171110	Underwater Fire	Falkor	2017	Sample	ROV sample	ROV grab	S86	S86-Rock-05	-15.0884	-173.738	Tonga Forearc
FK171110	Underwater Fire	Falkor	2017	Sample	ROV sample	ROV grab	S86	S86-rock-06	-15.0895	-173.739	Tonga Forearc
FK171110	Underwater Fire	Falkor	2017	Sample	ROV sample	ROV grab	S86	S86-rock-07	-15.0897	-173.739	Tonga Forearc
FK171110	Underwater Fire	Falkor	2017	Sample	ROV sample	ROV grab	S86	S86-rock-09	-15.0894	-173.739	Tonga Forearc
FK171110	Underwater Fire	Falkor	2017	Sample	ROV sample	ROV grab	S86	S86-rock-10	-15.089	-173.739	Tonga Forearc
FK171110	Underwater Fire	Falkor	2017	Sample	ROV sample	ROV grab	S86	S86-rock-11	-15.0885	-173.739	Tonga Forearc
FK171110	Underwater Fire	Falkor	2017	Sample	ROV sample	ROV grab	S86	S86-rock-12	-15.0882	-173.739	Tonga Forearc
FK171110	Underwater Fire	Falkor	2017	Sample	ROV sample	ROV grab	S86	S86-rock-14	-15.0883	-173.739	Tonga Forearc
FK171110	Underwater Fire	Falkor	2017	Sample	ROV sample	ROV grab	S86	S86-rock-15	-15.0887	-173.74	Tonga Forearc
FK171110	Underwater Fire	Falkor	2017	Sample	ROV sample	ROV grab	S86	S86-rock-16	-15.0898	-173.74	Tonga Forearc
FK171110	Underwater Fire	Falkor	2017	Sample	ROV sample	ROV grab	S86	S86-rock-18	-15.0895	-173.741	Tonga Forearc
FK171110	Underwater Fire	Falkor	2017	Sediment	ROV sediment	ROV sediment	S103-sed-02	S103-sed-02	-15.0883	-173.737	Tonga Forearc
FK171110	Underwater Fire	Falkor	2017	Sediment	ROV sediment	ROV sediment	S103-sed-06	S103-sed-06	-15.0884	-173.738	Tonga Forearc
FK171110	Underwater Fire	Falkor	2017	Sediment	ROV sediment	ROV sediment	S103-sed-08	S103-sed-08	-15.0891	-173.739	Tonga Forearc
FK171110	Underwater Fire	Falkor	2017	Sediment	ROV sediment	ROV sediment	S103-sed-14	S103-sed-14	-15.0892	-173.742	Tonga Forearc
FK171110	Underwater Fire	Falkor	2017	Sediment	ROV sediment	ROV sediment	S103-sed-19	S103-sed-19	-15.091	-173.745	Tonga Forearc
FK171110	Underwater Fire	Falkor	2017	Sediment	ROV sediment	ROV sediment	S103-sed-21	S103-sed-21	-15.0921	-173.745	Tonga Forearc
FK171110	Underwater Fire	Falkor	2017	Sediment	ROV sediment	ROV sediment	S86-sed-03	S86-sed-03	-15.09	-173.736	Tonga Forearc
FK171110	Underwater Fire	Falkor	2017	Sediment	ROV sediment	ROV sediment	S86-sed-08	S86-sed-08	-15.0898	-173.74	Tonga Forearc
FK171110	Underwater Fire	Falkor	2017	Sample	ROV sample	ROV grab	S85	S85-Rock-01	-15.0982	-173.753	Tonga Forearc
FK171110	Underwater Fire	Falkor	2017	Sample	ROV sample	ROV grab	S85	S85-Rock-02	-15.0974	-173.753	Tonga Forearc
FK171110	Underwater Fire	Falkor	2017	Sample	ROV sample	ROV grab	S85	S85-Rock-03	-15.0972	-173.752	Tonga Forearc
FK171110	Underwater Fire	Falkor	2017	Sample	ROV sample	ROV grab	S85	S85-Rock-05	-15.0953	-173.75	Tonga Forearc
FK171110	Underwater Fire	Falkor	2017	Sample	ROV sample	ROV grab	S85	S85-rock-14	-15.0945	-173.747	Tonga Forearc
FK171110	Underwater Fire	Falkor	2017	Sample	ROV sample	ROV grab	S85	S85-rock-15	-15.0944	-173.747	Tonga Forearc
FK171110	Underwater Fire	Falkor	2017	Sample	ROV sample	ROV grab	S85	S85-rock-17	-15.0932	-173.747	Tonga Forearc
FK171110	Underwater Fire	Falkor	2017	Sample	ROV sample	ROV grab	S85	S85-rock-18	-15.0913	-173.746	Tonga Forearc
FK171110	Underwater Fire	Falkor	2017	Sample	ROV sample	ROV grab	S85	S85-rock-19	-15.09	-173.745	Tonga Forearc
FK171110	Underwater Fire	Falkor	2017	Sample	ROV sample	ROV grab	S85	S85-rock-20	-15.0903	-173.745	Tonga Forearc
FK171110	Underwater Fire	Falkor	2017	Sample	ROV sample	ROV grab	S85	S85-rock-21	-15.0904	-173.745	Tonga Forearc
FK171110	Underwater Fire	Falkor	2017	Sample	ROV sample	ROV grab	S85	S85-rock-22	-15.0902	-173.745	Tonga Forearc
FK171110	Underwater Fire	Falkor	2017	Sample	ROV sample	ROV grab	S87	S87-rock-01	-15.1021	-173.749	Tonga Forearc
FK171110	Underwater Fire	Falkor	2017	Sample	ROV sample	ROV grab	S87	S87-rock-03	-15.0983	-173.748	Tonga Forearc
FK171110	Underwater Fire	Falkor	2017	Sample	ROV sample	ROV grab	S87	S87-rock-04	-15.0965	-173.748	Tonga Forearc
FK171110	Underwater Fire	Falkor	2017	Sample	ROV sample	ROV grab	S87	S87-rock-05	-15.0948	-173.749	Tonga Forearc
FK171110	Underwater Fire	Falkor	2017	Sample	ROV sample	ROV grab	S87	S87-rock-13	-15.0942	-173.748	Tonga Forearc
FK171110	Underwater Fire	Falkor	2017	Sediment	ROV sediment	ROV sediment	S85-Sed-04	S85-Sed-04	-15.0969	-173.752	Tonga Forearc
FK171110	Underwater Fire	Falkor	2017	Sediment	ROV sediment	ROV sediment	S87-sed-14	S87-sed-14	-15.0949	-173.746	Tonga Forearc
FK171110	Underwater Fire	Falkor	2017	Sediment	ROV sediment	ROV sediment	S87-sed-18	S87-sed-18	-15.0946	-173.746	Tonga Forearc
FK171110	Underwater Fire	Falkor	2017	Sample	ROV sample	ROV grab	S88	S88-rock-01	-15.071	-173.706	Tonga Forearc
FK171110	Underwater Fire	Falkor	2017	Sample	ROV sample	ROV grab	S88	S88-rock-02	-15.0701	-173.709	Tonga Forearc
FK171110	Underwater Fire	Falkor	2017	Sample	ROV sample	ROV grab	S88	S88-rock-03	-15.0696	-173.709	Tonga Forearc
FK171110	Underwater Fire	Falkor	2017	Sample	ROV sample	ROV grab	S88	S88-rock-04	-15.0706	-173.71	Tonga Forearc
FK171110	Underwater Fire	Falkor	2017	Sample	ROV sample	ROV grab	S88	S88-rock-06	-15.0714	-173.713	Tonga Forearc
FK171110	Underwater Fire	Falkor	2017	Sample	ROV sample	ROV grab	S88	S88-rock-07	-15.0707	-173.712	Tonga Forearc
FK171110	Underwater Fire	Falkor	2017	Sample	ROV sample	ROV grab	S88	S88-rock-08	-15.0694	-173.711	Tonga Forearc
FK171110	Underwater Fire	Falkor	2017	Sample	ROV sample	ROV grab	S88	S88-rock-11	-15.067	-173.709	Tonga Forearc
FK171110	Underwater Fire	Falkor	2017	Sample	ROV sample	ROV grab	S88	S88-rock-12	-15.0663	-173.708	Tonga Forearc
FK171110	Underwater Fire	Falkor	2017	Sample	ROV sample	ROV grab	S88	S88-rock-13	-15.0661	-173.709	Tonga Forearc
FK171110	Underwater Fire	Falkor	2017	Sample	ROV sample	ROV grab	S88	S88-rock-15	-15.066	-173.71	Tonga Forearc
FK171110	Underwater Fire	Falkor	2017	Sample	ROV sample	ROV grab	S88	S88-rock-16	-15.0647	-173.711	Tonga Forearc
FK171110	Underwater Fire	Falkor	2017	Sample	ROV sample	ROV grab	S88	S88-rock-18	-15.0644	-173.711	Tonga Forearc
FK171110	Underwater Fire	Falkor	2017	Sample	ROV sample	ROV grab	S93	S93-rock-02	-15.0672	-173.73	Tonga Forearc
FK171110	Underwater Fire	Falkor	2017	Sample	ROV sample	ROV grab	S93	S93-rock-03	-15.068	-173.731	Tonga Forearc
FK171110	Underwater Fire	Falkor	2017	Sample	ROV sample	ROV grab	S93	S93-rock-05	-15.0684	-173.731	Tonga Forearc
FK171110	Underwater Fire	Falkor	2017	Sample	ROV sample	ROV grab	S93	S93-rock-06	-15.0695	-173.733	Tonga Forearc
FK171110	Underwater Fire	Falkor	2017	Sample	ROV sample	ROV grab	S93	S93-rock-07	-15.0706	-173.733	Tonga Forearc
FK171110	Underwater Fire	Falkor	2017	Sample	ROV sample	ROV grab	S93	S93-rock-08	-15.0704	-173.734	Tonga Forearc
FK171110	Underwater Fire	Falkor	2017	Sample	ROV sample	ROV grab	S93	S93-rock-09	-15.0705	-173.735	Tonga Forearc
FK171110	Underwater Fire	Falkor	2017	Sample	ROV sample	ROV grab	S93	S93-rock-10	-15.0721	-173.736	Tonga Forearc
FK171110	Underwater Fire	Falkor	2017	Sample	ROV sample	ROV grab	S93	S93-rock-13	-15.0719	-173.738	Tonga Forearc
FK171110	Underwater Fire	Falkor	2017	Sample	ROV sample	ROV grab	S93	S93-rock-14	-15.0738	-173.737	Tonga Forearc
FK171110	Underwater Fire	Falkor	2017	Sample	ROV sample	ROV grab	S93	S93-rock-15	-15.0739	-173.738	Tonga Forearc
FK171110	Underwater Fire	Falkor	2017	Sample	ROV sample	ROV grab	S93	S93-rock-17	-15.0746	-173.739	Tonga Forearc
FK171110	Underwater Fire	Falkor	2017	Sample	ROV sample	ROV grab	S93	S93-rock-18	-15.0747	-173.739	Tonga Forearc
FK171110	Underwater Fire	Falkor	2017	Sample	ROV sample	ROV grab	S93	S93-rock-19	-15.0748	-173.738	Tonga Forearc
FK171110	Underwater Fire	Falkor	2017	Sediment	ROV sediment	ROV sediment	S88-sed-05	S88-sed-05	-15.0712	-173.712	Tonga Forearc
FK171110	Underwater Fire	Falkor	2017	Sediment	ROV sediment	ROV sediment	S88-sed-09	S88-sed-09	-15.0689	-173.711	Tonga Forearc
FK171110	Underwater Fire	Falkor	2017	Sediment	ROV sediment	ROV sediment	S88-sed-10	S88-sed-10	-15.0689	-173.711	Tonga Forearc
FK171110	Underwater Fire	Falkor	2017	Sediment	ROV sediment	ROV sediment	S88-sed-14	S88-sed-14	-15.0661	-173.709	Tonga Forearc
FK171110	Underwater Fire	Falkor	2017	Sediment	ROV sediment	ROV sediment	S93-sed-04	S93-sed-04	-15.0683	-173.731	Tonga Forearc
FK171110	Underwater Fire	Falkor	2017	Sediment	ROV sediment	ROV sediment	S93-sed-11	S93-sed-11	-15.0722	-173.736	Tonga Forearc
FK171110	Underwater Fire	Falkor	2017	Sediment	ROV sediment	ROV sediment	S93-sed-12	S93-sed-12	-15.0719	-173.738	Tonga Forearc
FK171110	Underwater Fire	Falkor	2017	Sediment	ROV sediment	ROV sediment	S93-sed-16	S93-sed-16	-15.0745	-173.739	Tonga Forearc
FK171110	Underwater Fire	Falkor	2017	Sample	ROV sample	ROV grab	S95-rock-02	S95-rock-02	-15.1185	-173.801	Tonga Forearc
FK171110	Underwater Fire	Falkor	2017	Sample	ROV sample	ROV grab	S95-rock-03	S95-rock-03	-15.1198	-173.799	Tonga Forearc
FK171110	Underwater Fire	Falkor	2017	Sample	ROV sample	ROV grab	S95-rock-04	S95-rock-04	-15.1188	-173.801	Tonga Forearc
FK171110	Underwater Fire	Falkor	2017	Sample	ROV sample	ROV grab	S95-rock-05	S95-rock-05	-15.1186	-173.802	Tonga Forearc
FK171110	Underwater Fire	Falkor	2017	Sample	ROV sample	ROV grab	S95-rock-06	S95-rock-06	-15.118	-173.799	Tonga Forearc
FK171110	Underwater Fire	Falkor	2017	Sample	ROV sample	ROV grab	S95-rock-07	S95-rock-07	-15.1164	-173.794	Tonga Forearc
FK171110	Underwater Fire	Falkor	2017	Sample	ROV sample	ROV grab	S95-rock-08	S95-rock-08	-15.1186	-173.791	Tonga Forearc
FK171110	Underwater Fire	Falkor	2017	Sample	ROV sample	ROV grab	S95-rock-09	S95-rock-09	-15.1182	-173.789	Tonga Forearc
FK171110	Underwater Fire	Falkor	2017	Sample	ROV sample	ROV grab	S95-rock-11	S95-rock-11	-15.118	-173.789	Tonga Forearc
FK171110	Underwater Fire	Falkor	2017	Sample	ROV sample	ROV grab	S95-rock-12	S95-rock-12	-15.1177	-173.788	Tonga Forearc
FK171110	Underwater Fire	Falkor	2017	Sample	ROV sample	ROV grab	S95-rock-13	S95-rock-13	-15.1174	-173.787	Tonga Forearc
FK171110	Underwater Fire	Falkor	2017	Sample	ROV sample	ROV grab	S95-rock-15	S95-rock-15	-15.1172	-173.787	Tonga Forearc
FK171110	Underwater Fire	Falkor	2017	Sample	ROV sample	ROV grab	S95-rock-16	S95-rock-16	-15.1172	-173.786	Tonga Forearc
FK171110	Underwater Fire	Falkor	2017	Sample	ROV sample	ROV grab	S95-rock-17	S95-rock-17	-15.1171	-173.786	Tonga Forearc
FK171110	Underwater Fire	Falkor	2017	Sample	ROV sample	ROV grab	S95-rock-20	S95-rock-20	-15.1165	-173.785	Tonga Forearc
FK171110	Underwater Fire	Falkor	2017	Sample	ROV sample	ROV grab	S95-rock-21	S95-rock-21	-15.1158	-173.784	Tonga Forearc
FK171110	Underwater Fire	Falkor	2017	Sample	ROV sample	ROV grab	S95-rock-22	S95-rock-22	-15.1152	-173.782	Tonga Forearc
FK171110	Underwater Fire	Falkor	2017	Sediment	ROV sediment	ROV sediment	S95-sed-01	S95-sed-01	-15.1186	-173.801	Tonga Forearc
FK171110	Underwater Fire	Falkor	2017	Sediment	ROV sediment	ROV sediment	S95-sed-10	S95-sed-10	-15.1183	-173.789	Tonga Forearc
FK171110	Underwater Fire	Falkor	2017	Sediment	ROV sediment	ROV sediment	S95-sed-14	S95-sed-14	-15.1174	-173.787	Tonga Forearc
FK171110	Underwater Fire	Falkor	2017	Sample	ROV sample	ROV grab	S98-rock-03	S98-rock-03	-15.3832	-174.257	Northeast Lau
FK171110	Underwater Fire	Falkor	2017	Sample	ROV sample	ROV grab	S98-rock-04	S98-rock-04	-15.3837	-174.257	Northeast Lau
FK171110	Underwater Fire	Falkor	2017	Sample	ROV sample	ROV grab	S98-rock-05	S98-rock-05	-15.3838	-174.257	Northeast Lau
FK171110	Underwater Fire	Falkor	2017	Sample	ROV sample	ROV grab	S98-rock-07	S98-rock-07	-15.3843	-174.256	Northeast Lau
FK171110	Underwater Fire	Falkor	2017	Sample	ROV sample	ROV grab	S98-rock-08	S98-rock-08	-15.385	-174.255	Northeast Lau
FK171110	Underwater Fire	Falkor	2017	Sample	ROV sample	ROV grab	S98-rock-09	S98-rock-09	-15.3848	-174.252	Northeast Lau
FK171110	Underwater Fire	Falkor	2017	Sample	ROV sample	ROV grab	S98-rock-11	S98-rock-11	-15.3815	-174.253	Northeast Lau
FK171110	Underwater Fire	Falkor	2017	Sample	ROV sample	ROV grab	S98-rock-12	S98-rock-12	-15.381	-174.25	Northeast Lau
FK171110	Underwater Fire	Falkor	2017	Sample	ROV sample	ROV grab	s98-rock-14	s98-rock-14	-15.378	-174.249	Northeast Lau
FK171110	Underwater Fire	Falkor	2017	Sample	ROV sample	ROV grab	S98-rock-15	S98-rock-15	-15.3772	-174.248	Northeast Lau
FK171110	Underwater Fire	Falkor	2017	Sample	ROV sample	ROV grab	S98-rock-17	S98-rock-17	-15.3774	-174.247	Northeast Lau
FK171110	Underwater Fire	Falkor	2017	Sample	ROV sample	ROV grab	S98-rock-18	S98-rock-18	-15.3774	-174.248	Northeast Lau
FK171110	Underwater Fire	Falkor	2017	Sample	ROV sample	ROV grab	S98-rock-21	S98-rock-21	-15.3759	-174.246	Northeast Lau
FK171110	Underwater Fire	Falkor	2017	Sample	ROV sample	ROV grab	S98-rock-22	S98-rock-22	-15.3753	-174.245	Northeast Lau
FK171110	Underwater Fire	Falkor	2017	Sediment	ROV sediment	ROV sediment	S98-sed-01	S98-sed-01	-15.3817	-174.259	Northeast Lau
FK171110	Underwater Fire	Falkor	2017	Sediment	ROV sediment	ROV sediment	S98-sed-02	S98-sed-02	-15.3822	-174.258	Northeast Lau
FK171110	Underwater Fire	Falkor	2017	Sediment	ROV sediment	ROV sediment	S98-sed-06	S98-sed-06	-15.3844	-174.256	Northeast Lau
FK171110	Underwater Fire	Falkor	2017	Sediment	ROV sediment	ROV sediment	S98-sed-13	S98-sed-13	-15.3795	-174.249	Northeast Lau
FK171110	Underwater Fire	Falkor	2017	Sediment	ROV sediment	ROV sediment	S98-sed-16	S98-sed-16	-15.3775	-174.247	Northeast Lau
FK171110	Underwater Fire	Falkor	2017	Sample	ROV sample	ROV grab	S99-rock-01	S99-rock-01	-15.343	-174.225	Northeast Lau
FK171110	Underwater Fire	Falkor	2017	Sample	ROV sample	ROV grab	S99-rock-02	S99-rock-02	-15.3435	-174.225	Northeast Lau
FK171110	Underwater Fire	Falkor	2017	Sample	ROV sample	ROV grab	S99-rock-03	S99-rock-03	-15.3447	-174.226	Northeast Lau
FK171110	Underwater Fire	Falkor	2017	Sample	ROV sample	ROV grab	S99-rock-04	S99-rock-04	-15.3448	-174.226	Northeast Lau
FK171110	Underwater Fire	Falkor	2017	Sample	ROV sample	ROV grab	S99-rock-05	S99-rock-05	-15.3448	-174.227	Northeast Lau
FK171110	Underwater Fire	Falkor	2017	Sample	ROV sample	ROV grab	S99-rock-06	S99-rock-06	-15.3464	-174.227	Northeast Lau
FK171110	Underwater Fire	Falkor	2017	Sample	ROV sample	ROV grab	S99-rock-07	S99-rock-07	-15.3476	-174.227	Northeast Lau
FK171110	Underwater Fire	Falkor	2017	Sample	ROV sample	ROV grab	S99-rock-08	S99-rock-08	-15.3479	-174.228	Northeast Lau
FK171110	Underwater Fire	Falkor	2017	Sample	ROV sample	ROV grab	S99-rock-10	S99-rock-10	-15.3495	-174.228	Northeast Lau
FK171110	Underwater Fire	Falkor	2017	Sample	ROV sample	ROV grab	S99-rock-11	S99-rock-11	-15.351	-174.229	Northeast Lau
FK171110	Underwater Fire	Falkor	2017	Sample	ROV sample	ROV grab	S99-rock-12	S99-rock-12	-15.3516	-174.229	Northeast Lau
FK171110	Underwater Fire	Falkor	2017	Sample	ROV sample	ROV grab	S99-rock-13	S99-rock-13	-15.355	-174.231	Northeast Lau
FK171110	Underwater Fire	Falkor	2017	Sample	ROV sample	ROV grab	S99-rock-14	S99-rock-14	-15.3567	-174.232	Northeast Lau
FK171110	Underwater Fire	Falkor	2017	Sample	ROV sample	ROV grab	S99-rock-18	S99-rock-18	-15.3589	-174.233	Northeast Lau
FK171110	Underwater Fire	Falkor	2017	Sample	ROV sample	ROV grab	S99-rock-20	S99-rock-20	-15.3605	-174.234	Northeast Lau
FK171110	Underwater Fire	Falkor	2017	Sample	ROV sample	ROV grab	S99-rock-21	S99-rock-21	-15.3637	-174.237	Northeast Lau
FK171110	Underwater Fire	Falkor	2017	Sample	ROV sample	ROV grab	S99-rock-26	S99-rock-26	-15.3668	-174.239	Northeast Lau
FK171110	Underwater Fire	Falkor	2017	Sediment	ROV sediment	ROV sediment	S99-sed-09	S99-sed-09	-15.3488	-174.228	Northeast Lau
FK171110	Underwater Fire	Falkor	2017	Sediment	ROV sediment	ROV sediment	S99-sed-15	S99-sed-15	-15.3574	-174.232	Northeast Lau
FK171110	Underwater Fire	Falkor	2017	Sediment	ROV sediment	ROV sediment	S99-sed-25	S99-sed-25	-15.3668	-174.239	Northeast Lau
FK171110	Underwater Fire	Falkor	2017	Sample	ROV sample	ROV grab	S89	S89-rock-23	-15.0181	-173.782	Tonga Forearc
FK171110	Underwater Fire	Falkor	2017	Sediment	ROV sediment	ROV sediment	S89-sed-24	S89-sed-24	-15.0181	-173.782	Tonga Forearc
FK171110	Underwater Fire	Falkor	2017	Sample	ROV sample	ROV grab	S89	S89-rock-25	-15.0183	-173.781	Tonga Forearc
FK171110	Underwater Fire	Falkor	2017	Sample	ROV sample	ROV grab	S89	S89-rock-22	-15.0179	-173.784	Tonga Forearc
FK171110	Underwater Fire	Falkor	2017	Sample	ROV sample	ROV grab	S89	S89-rock-21	-15.0181	-173.785	Tonga Forearc
FK171110	Underwater Fire	Falkor	2017	Sample	ROV sample	ROV grab	S100	S100-rock-01	-15.0129	-173.78	Tonga Forearc
FK171110	Underwater Fire	Falkor	2017	Sample	ROV sample	ROV grab	S100	S100-rock-02	-15.013	-173.78	Tonga Forearc
FK171110	Underwater Fire	Falkor	2017	Sample	ROV sample	ROV grab	S100	S100-rock-03	-15.0131	-173.78	Tonga Forearc
FK171110	Underwater Fire	Falkor	2017	Sample	ROV sample	ROV grab	S100	S100-rock-04	-15.0134	-173.78	Tonga Forearc
FK171110	Underwater Fire	Falkor	2017	Sample	ROV sample	ROV grab	S100	S100-rock-05	-15.0136	-173.78	Tonga Forearc
FK171110	Underwater Fire	Falkor	2017	Sample	ROV sample	ROV grab	S100	S100-rock-06	-15.0143	-173.78	Tonga Forearc
FK171110	Underwater Fire	Falkor	2017	Sample	ROV sample	ROV grab	S100	S100-rock-08	-15.0132	-173.781	Tonga Forearc
FK171110	Underwater Fire	Falkor	2017	Sample	ROV sample	ROV grab	S89	S89-rock-01	-15.0163	-173.788	Tonga Forearc
FK171110	Underwater Fire	Falkor	2017	Sample	ROV sample	ROV grab	S89	S89-rock-02	-15.0163	-173.788	Tonga Forearc
FK171110	Underwater Fire	Falkor	2017	Sediment	ROV sediment	ROV sediment	S100-sed-07	S100-sed-07	-15.0148	-173.78	Tonga Forearc
FK171110	Underwater Fire	Falkor	2017	Sample	ROV sample	ROV grab	S91	S91-rock-01	-15.0074	-173.802	Tonga Forearc
FK171110	Underwater Fire	Falkor	2017	Sample	ROV sample	ROV grab	S91	S91-rock-02	-15.0065	-173.802	Tonga Forearc
FK171110	Underwater Fire	Falkor	2017	Sample	ROV sample	ROV grab	S91	S91-rock-04	-15.0057	-173.801	Tonga Forearc
FK171110	Underwater Fire	Falkor	2017	Sample	ROV sample	ROV grab	S91	S91-rock-05	-15.0047	-173.8	Tonga Forearc
FK171110	Underwater Fire	Falkor	2017	Sample	ROV sample	ROV grab	S91	S91-rock-06	-15.0045	-173.8	Tonga Forearc
FK171110	Underwater Fire	Falkor	2017	Sample	ROV sample	ROV grab	S91	S91-rock-07	-15.0042	-173.798	Tonga Forearc
FK171110	Underwater Fire	Falkor	2017	Sample	ROV sample	ROV grab	S91	S91-rock-09	-15.0051	-173.796	Tonga Forearc
FK171110	Underwater Fire	Falkor	2017	Sample	ROV sample	ROV grab	S94	S94-rock-01	-14.9998	-173.794	Tonga Forearc
FK171110	Underwater Fire	Falkor	2017	Sample	ROV sample	ROV grab	S94	S94-rock-02	-14.9999	-173.794	Tonga Forearc
FK171110	Underwater Fire	Falkor	2017	Sample	ROV sample	ROV grab	S94	S94-rock-03	-15.0021	-173.79	Tonga Forearc
FK171110	Underwater Fire	Falkor	2017	Sample	ROV sample	ROV grab	S94	S94-rock-04	-15.0025	-173.79	Tonga Forearc
FK171110	Underwater Fire	Falkor	2017	Sample	ROV sample	ROV grab	S94	S94-rock-05	-15.0035	-173.789	Tonga Forearc
FK171110	Underwater Fire	Falkor	2017	Sample	ROV sample	ROV grab	S94	S94-rock-06	-15.0044	-173.791	Tonga Forearc
FK171110	Underwater Fire	Falkor	2017	Sediment	ROV sediment	ROV sediment	S91-sed-08	S91-sed-08	-15.0048	-173.797	Tonga Forearc
FK171110	Underwater Fire	Falkor	2017	Sediment	ROV sediment	ROV sediment	S94-sed-07	S94-sed-07	-15.0045	-173.791	Tonga Forearc
FK171110	Underwater Fire	Falkor	2017	Sample	ROV sample	ROV grab	S91	S91-rock-10	-15.0051	-173.795	Tonga Forearc
FK171110	Underwater Fire	Falkor	2017	Sample	ROV sample	ROV grab	S104	S104-rock-01	-15.0349	-173.779	Tonga Forearc
FK171110	Underwater Fire	Falkor	2017	Sample	ROV sample	ROV grab	S104	S104-rock-03	-15.0355	-173.78	Tonga Forearc
FK171110	Underwater Fire	Falkor	2017	Sample	ROV sample	ROV grab	S104	S104-rock-04	-15.0362	-173.781	Tonga Forearc
FK171110	Underwater Fire	Falkor	2017	Sample	ROV sample	ROV grab	S104	S104-rock-05	-15.0359	-173.783	Tonga Forearc
FK171110	Underwater Fire	Falkor	2017	Sample	ROV sample	ROV grab	S104	S104-rock-06	-15.0363	-173.784	Tonga Forearc
FK171110	Underwater Fire	Falkor	2017	Sample	ROV sample	ROV grab	S104	S104-rock-08	-15.0377	-173.785	Tonga Forearc
FK171110	Underwater Fire	Falkor	2017	Sample	ROV sample	ROV grab	S104	S104-rock-10	-15.0373	-173.786	Tonga Forearc
FK171110	Underwater Fire	Falkor	2017	Sample	ROV sample	ROV grab	S104	S104-rock-11	-15.0381	-173.789	Tonga Forearc
FK171110	Underwater Fire	Falkor	2017	Sample	ROV sample	ROV grab	S104	S104-rock-12	-15.0383	-173.789	Tonga Forearc
FK171110	Underwater Fire	Falkor	2017	Sample	ROV sample	ROV grab	S104	S104-rock-16	-15.0404	-173.79	Tonga Forearc
FK171110	Underwater Fire	Falkor	2017	Sample	ROV sample	ROV grab	S104	S104-rock-17	-15.042	-173.791	Tonga Forearc
FK171110	Underwater Fire	Falkor	2017	Sample	ROV sample	ROV grab	S104	S104-rock-18	-15.0411	-173.789	Tonga Forearc
FK171110	Underwater Fire	Falkor	2017	Sample	ROV sample	ROV grab	S104	S104-rock-19	-15.0403	-173.86	Tonga Forearc
FK171110	Underwater Fire	Falkor	2017	Sample	ROV sample	ROV grab	S104	S104-rock-20	-15.0417	-173.785	Tonga Forearc
FK171110	Underwater Fire	Falkor	2017	Sample	ROV sample	ROV grab	S104	S104-rock-21	-15.0418	-173.786	Tonga Forearc
FK171110	Underwater Fire	Falkor	2017	Sediment	ROV sediment	ROV sediment	S104-sed-02	S104-sed-02	-15.0349	-173.779	Tonga Forearc
FK171110	Underwater Fire	Falkor	2017	Sediment	ROV sediment	ROV sediment	S104-sed-09	S104-sed-09	-15.0377	-173.785	Tonga Forearc
FK171110	Underwater Fire	Falkor	2017	Sample	ROV sample	ROV grab	S101	S101-rock-01	-14.9462	-173.8	Tonga Forearc
FK171110	Underwater Fire	Falkor	2017	Sample	ROV sample	ROV grab	S101	S101-rock-02	-14.9458	-173.799	Tonga Forearc
FK171110	Underwater Fire	Falkor	2017	Sample	ROV sample	ROV grab	S101	S101-rock-04	-14.9456	-173.799	Tonga Forearc
FK171110	Underwater Fire	Falkor	2017	Sample	ROV sample	ROV grab	S101	S101-rock-05	-14.945	-173.799	Tonga Forearc
FK171110	Underwater Fire	Falkor	2017	Sample	ROV sample	ROV grab	S101	S101-rock-06	-14.9439	-173.798	Tonga Forearc
FK171110	Underwater Fire	Falkor	2017	Sediment	ROV sediment	ROV sediment	S101-sed-03	S101-sed-03	-14.9456	-173.799	Tonga Forearc
FK171110	Underwater Fire	Falkor	2017	Sediment	ROV sediment	ROV sediment	S101-sed-07	S101-sed-07	-14.943	-173.799	Tonga Forearc
FK171110	Underwater Fire	Falkor	2017	Sample	ROV sample	ROV grab	S101	S101-rock-08	-14.9401	-173.795	Tonga Forearc
FK171110	Underwater Fire	Falkor	2017	Sample	ROV sample	ROV grab	S101	S101-rock-10	-14.9395	-173.793	Tonga Forearc
FK171110	Underwater Fire	Falkor	2017	Sample	ROV sample	ROV grab	S101	S101-rock-11	-14.9384	-173.794	Tonga Forearc
FK171110	Underwater Fire	Falkor	2017	Sample	ROV sample	ROV grab	S101	S101-rock-12	-14.9383	-173.796	Tonga Forearc
FK171110	Underwater Fire	Falkor	2017	Sample	ROV sample	ROV grab	S101	S101-rock-13	-14.9401	-173.798	Tonga Forearc
FK171110	Underwater Fire	Falkor	2017	Sample	ROV sample	ROV grab	S101	S101-rock-14	-14.9402	-173.798	Tonga Forearc
FK171110	Underwater Fire	Falkor	2017	Sample	ROV sample	ROV grab	S102	S102-rock-11	-14.9389	-173.8	Tonga Forearc
FK171110	Underwater Fire	Falkor	2017	Sediment	ROV sediment	ROV sediment	S101-sed-09	S101-sed-09	-14.9405	-173.794	Tonga Forearc
FK171110	Underwater Fire	Falkor	2017	Sample	ROV sample	ROV grab	S102	S102-rock-01	-14.944	-173.809	Tonga Forearc
FK171110	Underwater Fire	Falkor	2017	Sample	ROV sample	ROV grab	S102	S102-rock-03	-14.9431	-173.808	Tonga Forearc
FK171110	Underwater Fire	Falkor	2017	Sample	ROV sample	ROV grab	S102	S102-rock-04	-14.9428	-173.808	Tonga Forearc
FK171110	Underwater Fire	Falkor	2017	Sample	ROV sample	ROV grab	S102	S102-rock-05	-14.9427	-173.807	Tonga Forearc
FK171110	Underwater Fire	Falkor	2017	Sediment	ROV sediment	ROV sediment	S102-sed-02	S102-sed-02	-14.9433	-173.808	Tonga Forearc
FK171110	Underwater Fire	Falkor	2017	Sample	ROV sample	ROV grab	S102	S102-rock-06	-14.9414	-173.805	Tonga Forearc
FK171110	Underwater Fire	Falkor	2017	Sample	ROV sample	ROV grab	S102	S102-rock-08	-14.9418	-173.804	Tonga Forearc
FK171110	Underwater Fire	Falkor	2017	Sample	ROV sample	ROV grab	S102	S102-rock-09	-14.9417	-173.804	Tonga Forearc
FK171110	Underwater Fire	Falkor	2017	Sample	ROV sample	ROV grab	S102	S102-rock-10	-14.9414	-173.802	Tonga Forearc
FK171110	Underwater Fire	Falkor	2017	Sediment	ROV sediment	ROV sediment	S102-sed-07	S102-sed-07	-14.9413	-173.804	Tonga Forearc
FK171110	Underwater Fire	Falkor	2017	Sample	ROV sample	ROV grab	S90	S90-rock-01	-14.9162	-173.799	Tonga Forearc
FK171110	Underwater Fire	Falkor	2017	Sample	ROV sample	ROV grab	S90	S90-rock-02	-14.9165	-173.799	Tonga Forearc
FK171110	Underwater Fire	Falkor	2017	Sample	ROV sample	ROV grab	S90	S90-rock-03	-14.9177	-173.797	Tonga Forearc
FK171110	Underwater Fire	Falkor	2017	Sample	ROV sample	ROV grab	S90	S90-rock-04	-14.9189	-173.795	Tonga Forearc
FK171110	Underwater Fire	Falkor	2017	Sample	ROV sample	ROV grab	S90	S90-rock-05	-14.9151	-173.793	Tonga Forearc
FK171110	Underwater Fire	Falkor	2017	Sample	ROV sample	ROV grab	S90	S90-rock-06	-14.9141	-173.793	Tonga Forearc
FK171110	Underwater Fire	Falkor	2017	Sample	ROV sample	ROV grab	S90	S90-rock-07	-14.9131	-173.794	Tonga Forearc
FK171110	Underwater Fire	Falkor	2017	Sample	ROV sample	ROV grab	S90	S90-rock-08	-14.9122	-173.794	Tonga Forearc
FK171110	Underwater Fire	Falkor	2017	Sample	ROV sample	ROV grab	S90	S90-rock-09	-14.912	-173.79	Tonga Forearc
FK171110	Underwater Fire	Falkor	2017	Sample	ROV sample	ROV grab	S90	S90-rock-10	-14.9113	-173.788	Tonga Forearc
FK171110	Underwater Fire	Falkor	2017	Sample	ROV sample	ROV grab	S90	S90-rock-12	-14.9096	-173.788	Tonga Forearc
FK171110	Underwater Fire	Falkor	2017	Sample	ROV sample	ROV grab	S90	S90-rock-13	-14.907	-173.788	Tonga Forearc
FK171110	Underwater Fire	Falkor	2017	Sample	ROV sample	ROV grab	S90	S90-rock-14	-14.9069	-173.789	Tonga Forearc
FK171110	Underwater Fire	Falkor	2017	Sample	ROV sample	ROV grab	S90	S90-rock-15	-14.9064	-173.789	Tonga Forearc
FK171110	Underwater Fire	Falkor	2017	Sample	ROV sample	ROV grab	S90	S90-rock-16	-14.9049	-173.79	Tonga Forearc
FK171110	Underwater Fire	Falkor	2017	Sample	ROV sample	ROV grab	S90	S90-rock-17	-14.9041	-173.789	Tonga Forearc
FK171110	Underwater Fire	Falkor	2017	Sediment	ROV sediment	ROV sediment	S90-sed-11	S90-sed-11	-14.9096	-173.788	Tonga Forearc
FK171110	Underwater Fire	Falkor	2017	Sample	ROV sample	ROV grab	S97-rock-07	S97-rock-07	-14.9168	-173.775	Tonga Forearc
FK171110	Underwater Fire	Falkor	2017	Sample	ROV sample	ROV grab	S97-rock-12	S97-rock-12	-14.9145	-173.777	Tonga Forearc
FK171110	Underwater Fire	Falkor	2017	Sediment	ROV sediment	ROV sediment	S97-sed-01	S97-sed-01	-14.9159	-173.773	Tonga Forearc
FK171110	Underwater Fire	Falkor	2017	Sample	ROV sample	ROV grab	S96-rock-01	S96-rock-01	-14.9923	-173.814	Tonga Forearc
FK171110	Underwater Fire	Falkor	2017	Sample	ROV sample	ROV grab	S96-rock-02	S96-rock-02	-14.9926	-173.814	Tonga Forearc
FK171110	Underwater Fire	Falkor	2017	Sample	ROV sample	ROV grab	S96-rock-04	S96-rock-04	-14.9925	-173.813	Tonga Forearc
FK171110	Underwater Fire	Falkor	2017	Sample	ROV sample	ROV grab	S96-rock-05	S96-rock-05	-14.9913	-173.808	Tonga Forearc
FK171110	Underwater Fire	Falkor	2017	Sample	ROV sample	ROV grab	S96-rock-06	S96-rock-06	-14.9905	-173.807	Tonga Forearc
FK171110	Underwater Fire	Falkor	2017	Sediment	ROV sediment	ROV sediment	S96-sed-03	S96-sed-03	-14.9926	-173.814	Tonga Forearc
FK171110	Underwater Fire	Falkor	2017	Sample	ROV sample	ROV grab	S96-rock-07	S96-rock-07	-14.9889	-173.805	Tonga Forearc
FK171110	Underwater Fire	Falkor	2017	Sample	ROV sample	ROV grab	S96-rock-08	S96-rock-08	-14.9892	-173.803	Tonga Forearc
FK171110	Underwater Fire	Falkor	2017	Sample	ROV sample	ROV grab	S96-rock-09	S96-rock-09	-14.9899	-173.802	Tonga Forearc
FK171110	Underwater Fire	Falkor	2017	Sample	ROV sample	ROV grab	S96-rock-10	S96-rock-10	-14.9902	-173.801	Tonga Forearc
FK171110	Underwater Fire	Falkor	2017	Sample	ROV sample	ROV grab	S96-rock-15	S96-rock-15	-14.9895	-173.8	Tonga Forearc
FK171110	Underwater Fire	Falkor	2017	Sediment	ROV sediment	ROV sediment	S96-sed-14	S96-sed-14	-14.9895	-173.8	Tonga Forearc
FK171110	Underwater Fire	Falkor	2017	Sample	ROV sample	ROV grab	S96-rock-12	S96-rock-12	-14.992	-173.801	Tonga Forearc
FK171110	Underwater Fire	Falkor	2017	Sample	ROV sample	ROV grab	S96-rock-13	S96-rock-13	-14.993	-173.801	Tonga Forearc
FK171110	Underwater Fire	Falkor	2017	Sample	ROV sample	ROV grab	S96-rock-19	S96-rock-19	-14.9879	-173.796	Tonga Forearc
FK171110	Underwater Fire	Falkor	2017	Sample	ROV sample	ROV grab	S96-rock-20	S96-rock-20	-14.9869	-173.794	Tonga Forearc
FK171110	Underwater Fire	Falkor	2017	Sediment	ROV sediment	ROV sediment	S96-sed-17	S96-sed-17	-14.9882	-173.797	Tonga Forearc
FK171110	Underwater Fire	Falkor	2017	Sample	ROV sample	ROV grab	S105	S105-rock-01	-14.8872	-173.946	Northeast Lau
FK171110	Underwater Fire	Falkor	2017	Sample	ROV sample	ROV grab	S105	S105-rock-02	-14.888	-173.944	Northeast Lau
FK171110	Underwater Fire	Falkor	2017	Sample	ROV sample	ROV grab	S105	S105-rock-03	-14.8891	-173.944	Northeast Lau
FK171110	Underwater Fire	Falkor	2017	Sample	ROV sample	ROV grab	S105	S105-rock-04	-14.8891	-173.944	Northeast Lau
FK171110	Underwater Fire	Falkor	2017	Sample	ROV sample	ROV grab	S105	S105-rock-06	-14.8896	-173.943	Northeast Lau
FK171110	Underwater Fire	Falkor	2017	Sample	ROV sample	ROV grab	S105	S105-rock-10	-14.8932	-173.945	Northeast Lau
FK171110	Underwater Fire	Falkor	2017	Sample	ROV sample	ROV grab	S105	S105-rock-11	-14.8961	-173.945	Northeast Lau
FK171110	Underwater Fire	Falkor	2017	Sample	ROV sample	ROV grab	S105	S105-rock-12	-14.8961	-173.945	Northeast Lau
FK171110	Underwater Fire	Falkor	2017	Sample	ROV sample	ROV grab	S105	S105-rock-13	-14.8963	-173.944	Northeast Lau
FK171110	Underwater Fire	Falkor	2017	Sample	ROV sample	ROV grab	S105	S105-rock-15	-14.8994	-173.942	Northeast Lau
FK171110	Underwater Fire	Falkor	2017	Sample	ROV sample	ROV grab	S105	S105-rock-17	-14.9006	-173.939	Northeast Lau
FK171110	Underwater Fire	Falkor	2017	Sample	ROV sample	ROV grab	S105	S105-rock-18	-14.9006	-173.939	Northeast Lau
FK171110	Underwater Fire	Falkor	2017	Sediment	ROV sediment	ROV sediment	S105-sed-05	S105-sed-05	-14.8893	-173.943	Northeast Lau
FK171110	Underwater Fire	Falkor	2017	Sediment	ROV sediment	ROV sediment	S105-sed-07	S105-sed-07	-14.8903	-173.943	Northeast Lau
FK171110	Underwater Fire	Falkor	2017	Sediment	ROV sediment	ROV sediment	S105-sed-08	S105-sed-08	-14.8913	-173.944	Northeast Lau
FK171110	Underwater Fire	Falkor	2017	Sediment	ROV sediment	ROV sediment	S105-sed-09	S105-sed-09	-14.8919	-173.944	Northeast Lau
FK171110	Underwater Fire	Falkor	2017	Sediment	ROV sediment	ROV sediment	S105-sed-16	S105-sed-16	-14.8994	-173.942	Northeast Lau
FK171110	Underwater Fire	Falkor	2017	Sample	ROV sample	ROV grab	S92	S92-rock-01	-15.1814	-173.905	Northeast Lau
FK171110	Underwater Fire	Falkor	2017	Sample	ROV sample	ROV grab	S92	S92-rock-02	-15.182	-173.906	Northeast Lau
FK171110	Underwater Fire	Falkor	2017	Sample	ROV sample	ROV grab	S92	S92-rock-03	-15.1821	-173.906	Northeast Lau
FK171110	Underwater Fire	Falkor	2017	Sample	ROV sample	ROV grab	S92	S92-rock-05	-15.1838	-173.909	Northeast Lau
FK171110	Underwater Fire	Falkor	2017	Sample	ROV sample	ROV grab	S92	S92-rock-06	-15.1837	-173.909	Northeast Lau
FK171110	Underwater Fire	Falkor	2017	Sample	ROV sample	ROV grab	S92	S92-rock-08	-15.1841	-173.909	Northeast Lau
FK171110	Underwater Fire	Falkor	2017	Sample	ROV sample	ROV grab	S92	S92-rock-09	-15.1868	-173.913	Northeast Lau
FK171110	Underwater Fire	Falkor	2017	Sample	ROV sample	ROV grab	S92	S92-rock-11	-15.1894	-173.916	Northeast Lau
FK171110	Underwater Fire	Falkor	2017	Sample	ROV sample	ROV grab	S92	S92-rock-13	-15.1905	-173.917	Northeast Lau
FK171110	Underwater Fire	Falkor	2017	Sample	ROV sample	ROV grab	S92	S92-rock-16	-15.1917	-173.918	Northeast Lau
FK171110	Underwater Fire	Falkor	2017	Sample	ROV sample	ROV grab	S92	S92-rock-17	-15.193	-173.919	Northeast Lau
FK171110	Underwater Fire	Falkor	2017	Sample	ROV sample	ROV grab	S92	S92-rock-18	-15.1942	-173.921	Northeast Lau
FK171110	Underwater Fire	Falkor	2017	Sample	ROV sample	ROV grab	S92	S92-rock-20	-15.1969	-173.924	Northeast Lau
FK171110	Underwater Fire	Falkor	2017	Sample	ROV sample	ROV grab	S92	S92-rock-21	-15.1974	-173.924	Northeast Lau
FK171110	Underwater Fire	Falkor	2017	Sample	ROV sample	ROV grab	S92	S92-rock-22	-15.1981	-173.924	Northeast Lau
FK171110	Underwater Fire	Falkor	2017	Sediment	ROV sediment	ROV sediment	S92-sed-04	S92-sed-04	-15.1827	-173.907	Northeast Lau
FK171110	Underwater Fire	Falkor	2017	Sediment	ROV sediment	ROV sediment	S92-sed-10	S92-sed-10	-15.1885	-173.915	Northeast Lau
FK171110	Underwater Fire	Falkor	2017	Sediment	ROV sediment	ROV sediment	S92-sed-14	S92-sed-14	-15.1911	-173.917	Northeast Lau
FK171110	Underwater Fire	Falkor	2017	Sediment	ROV sediment	ROV sediment	S92-sed-19	S92-sed-19	-15.195	-173.923	Northeast Lau
FK171110	Underwater Fire	Falkor	2017	Sediment	ROV sediment	ROV sediment	S92-sed-23	S92-sed-23	-15.1983	-173.924	Northeast Lau
FK171110	Underwater Fire	Falkor	2017	Sediment	ROV sediment	ROV sediment	S93-sed-01	S93-sed-01	-15.0648	-173.728	Tonga Forearc
FK171110	Underwater Fire	Falkor	2017	Observation	AUV	AUV Sentry	ST-457	ST-457	-15.1009	-173.731	Tonga Forearc
FK171110	Underwater Fire	Falkor	2017	Observation	AUV	AUV Sentry	ST-458	ST-458	-15.0869	-173.705	Tonga Forearc
FK171110	Underwater Fire	Falkor	2017	Observation	AUV	AUV Sentry	ST-459	ST-459	-15.0967	-173.71	Tonga Forearc
FK171110	Underwater Fire	Falkor	2017	Observation	AUV	AUV Sentry	ST-460	ST-460	-15.1035	-173.713	Tonga Forearc
FK171110	Underwater Fire	Falkor	2017	Observation	AUV	AUV Sentry	ST-461	ST-461	-14.906	-173.785	Tonga Forearc
FK171110	Underwater Fire	Falkor	2017	Observation	AUV	AUV Sentry	ST-462	ST-462	-15.007	-173.774	Tonga Forearc
FK171110	Underwater Fire	Falkor	2017	Observation	AUV	AUV Sentry	ST-463	ST-463	-15.1114	-173.799	Tonga Forearc
FK171110	Underwater Fire	Falkor	2017	Sample	ROV sulfide	ROV sulfide	S100-sulfide09	S100-sulfide09	-15.0163	-173.787	Tonga Forearc
FK171110	Underwater Fire	Falkor	2017	Sample	ROV sulfide	ROV sulfide	S100-sulfide15	S100-sulfide15	-15.0167	-173.787	Tonga Forearc
FK171110	Underwater Fire	Falkor	2017	Sample	ROV sulfide	ROV sulfide	S100-sulfide16	S100-sulfide16	-15.0167	-173.787	Tonga Forearc
FK171110	Underwater Fire	Falkor	2017	Sample	ROV sulfide	ROV sulfide	S100-sulfide17	S100-sulfide17	-15.0168	-173.787	Tonga Forearc
FK171110	Underwater Fire	Falkor	2017	Sample	ROV sulfide	ROV sulfide	S100-sulfide21	S100-sulfide21	-15.0168	-173.786	Tonga Forearc
FK171110	Underwater Fire	Falkor	2017	Sample	ROV sulfide	ROV sulfide	S100-sulfide26	S100-sulfide26	-15.0168	-173.786	Tonga Forearc
FK171110	Underwater Fire	Falkor	2017	Sample	ROV sulfide	ROV sulfide	S101-sulfide17	S101-sulfide17	-14.9406	-173.8	Tonga Forearc
FK171110	Underwater Fire	Falkor	2017	Sample	ROV sulfide	ROV sulfide	S101-sulfide19	S101-sulfide19	-14.9406	-173.8	Tonga Forearc
FK171110	Underwater Fire	Falkor	2017	Sample	ROV sulfide	ROV sulfide	S102-sulfide17	S102-sulfide17	-14.9405	-173.799	Tonga Forearc
FK171110	Underwater Fire	Falkor	2017	Sample	ROV sulfide	ROV sulfide	S102-sulfide22	S102-sulfide22	-14.9406	-173.8	Tonga Forearc
FK171110	Underwater Fire	Falkor	2017	Sample	ROV sulfide	ROV sulfide	S102-sulfide25	S102-sulfide25	-14.9406	-173.8	Tonga Forearc
FK171110	Underwater Fire	Falkor	2017	Sample	ROV sulfide	ROV sulfide	S104-sulfide13	S104-sulfide13	-15.0391	-173.79	Tonga Forearc
FK171110	Underwater Fire	Falkor	2017	Sample	ROV sulfide	ROV sulfide	S104-sulfide15	S104-sulfide15	-15.0402	-173.791	Tonga Forearc
FK171110	Underwater Fire	Falkor	2017	Sample	ROV sulfide	ROV sulfide	S89-sulfide-03	S89-sulfide-03	-15.0168	-173.788	Tonga Forearc
FK171110	Underwater Fire	Falkor	2017	Sample	ROV sulfide	ROV sulfide	S89-sulfide-11	S89-sulfide-11	-15.0166	-173.788	Tonga Forearc
FK171110	Underwater Fire	Falkor	2017	Sample	ROV sulfide	ROV sulfide	S89-sulfide-14	S89-sulfide-14	-15.0173	-173.788	Tonga Forearc
FK171110	Underwater Fire	Falkor	2017	Sample	ROV sulfide	ROV sulfide	S91-sulfide-11	S91-sulfide-11	-15.0046	-173.793	Tonga Forearc
FK171110	Underwater Fire	Falkor	2017	Sample	ROV sulfide	ROV sulfide	S91-sulfide-12	S91-sulfide-12	-15.0048	-173.794	Tonga Forearc
FK171110	Underwater Fire	Falkor	2017	Sample	ROV sulfide	ROV sulfide	S91-sulfide-16	S91-sulfide-16	-15.0046	-173.794	Tonga Forearc
FK171110	Underwater Fire	Falkor	2017	Sample	ROV sulfide	ROV sulfide	S94-sulfide-09	S94-sulfide-09	-15.0046	-173.794	Tonga Forearc
FK171110	Underwater Fire	Falkor	2017	Sample	ROV sulfide	ROV sulfide	S94-sulfide-16	S94-sulfide-16	-15.0049	-173.794	Tonga Forearc
FK171110	Underwater Fire	Falkor	2017	Sample	ROV sulfide	ROV sulfide	S94-sulfide-20	S94-sulfide-20	-15.0047	-173.794	Tonga Forearc
FK171110	Underwater Fire	Falkor	2017	Sample	ROV sulfide	ROV sulfide	S94-sulfide-25	S94-sulfide-25	-15.0045	-173.794	Tonga Forearc
FK171110	Underwater Fire	Falkor	2017	Sample	ROV sulfide	ROV sulfide	S97-sulfide-02	S97-sulfide-02	-14.9156	-173.773	Tonga Forearc
FK171110	Underwater Fire	Falkor	2017	Sample	ROV sulfide	ROV sulfide	S97-sulfide-03	S97-sulfide-03	-14.9154	-173.774	Tonga Forearc
FK171110	Underwater Fire	Falkor	2017	Sample	ROV sulfide	ROV sulfide	S97-sulfide-09	S97-sulfide-09	-14.9163	-173.775	Tonga Forearc
FK171110	Underwater Fire	Falkor	2017	Sample	ROV sulfide	ROV sulfide	S97-sulfide-10	S97-sulfide-10	-14.9158	-173.776	Tonga Forearc
FK171110	Underwater Fire	Falkor	2017	Sample	ROV sulfide	ROV sulfide	S97-sulfide-11	S97-sulfide-11	-14.9158	-173.776	Tonga Forearc
FK171110	Underwater Fire	Falkor	2017	Sample	ROV sulfide	ROV sulfide	S97-sulfide-17	S97-sulfide-17	-14.9136	-173.779	Tonga Forearc
FK171110	Underwater Fire	Falkor	2017	Sample	ROV sulfide	ROV sulfide	S97-sulfide-22	S97-sulfide-22	-14.9134	-173.779	Tonga Forearc
Kall 82	Kall 82	Kallisto	1982	Sample	Dredge	Dredge	28	16-28	-15.0368	-173.87	Tonga Forearc
Kall 82	Kall 82	Kallisto	1982	Sample	Dredge	Dredge	94	16-94	-14.9517	-172.462	Pacific Seafloor
Kall 82	Kall 82	Kallisto	1982	Sample	Dredge	Dredge	95	16-95	-14.948	-172.413	Pacific Seafloor
Kall 82	Kall 82	Kallisto	1982	Sample	Dredge	Dredge	96	16-96	-14.9613	-172.369	Pacific Seafloor
Kall 82	Kall 82	Kallisto	1982	Sample	Dredge	Dredge	97	16-97	-14.945	-172.33	Pacific Seafloor
Kall 82	Kall 82	Kallisto	1982	Sample	Dredge	Dredge	98	16-98	-14.9702	-172.242	Pacific Seafloor
Kall 82	Kall 82	Kallisto	1982	Sample	Dredge	Dredge	99	16-99	-15.176	-172.319	Pacific Seafloor
Kall 82	Kall 82	Kallisto	1982	Sample	Dredge	Dredge	100	16-100	-15.1559	-172.265	Pacific Seafloor
Kall 82	Kall 82	Kallisto	1982	Sample	Dredge	Dredge	N/A	N/A	-14.9163	-174.262	Northeast Lau
Kall 82	Kall 82	Kallisto	1982	Sample	Dredge	Dredge	7	16-7	-14.093	-173.76	Pacific Seafloor
Kall 82	Kall 82	Kallisto	1982	Sample	Dredge	Dredge	N/A	N/A	-14.9084	-173.968	Northeast Lau
Kall 82	Kall 82	Kallisto	1982	Sample	Dredge	Dredge	N/A	N/A	-14.4591	-174.407	North Lau Forearc
Kall 82	Kall 82	Kallisto	1982	Sample	Dredge	Dredge	N/A	N/A	-14.4974	-174.404	North Lau Forearc
Kall 82	Kall 82	Kallisto	1982	Sample	Dredge	Dredge	N/A	N/A	-14.4875	-174.45	North Lau Forearc
Kall 82	Kall 82	Kallisto	1982	Sample	Dredge	Dredge	N/A	N/A	-14.5196	-174.457	North Lau Forearc
Kall 82	Kall 82	Kallisto	1982	Sample	Dredge	Dredge	N/A	N/A	-14.5517	-174.46	North Lau Forearc
Kall 82	Kall 82	Kallisto	1982	Sample	Dredge	Dredge	68	16-68	-15.1665	-173.015	Tonga Forearc
Kall 82	Kall 82	Kallisto	1982	Sample	Dredge	Dredge	66	16-66	-15.2045	-173.028	Tonga Forearc
Kall 82	Kall 82	Kallisto	1982	Sample	Dredge	Dredge	63	16-63	-15.2479	-172.943	Tonga Forearc
Kall 82	Kall 82	Kallisto	1982	Sample	Dredge	Dredge	67	16-67	-15.2322	-172.905	Tonga Forearc
Kall 82	Kall 82	Kallisto	1982	Sample	Dredge	Dredge	74	16-74	-15.1688	-172.927	Tonga Forearc
Kall 82	Kall 82	Kallisto	1982	Sample	Dredge	Dredge	73	16-73	-15.2041	-172.86	Tonga Forearc
Kall 82	Kall 82	Kallisto	1982	Sample	Dredge	Dredge	70	16-70	-15.2436	-172.863	Tonga Forearc
Kall 82	Kall 82	Kallisto	1982	Sample	Dredge	Dredge	72	16-72	-15.1711	-172.837	Tonga Forearc
Kall 82	Kall 82	Kallisto	1982	Sample	Dredge	Dredge	45	16-45	-14.8145	-173.35	Tonga Forearc
Kall 82	Kall 82	Kallisto	1982	Sample	Dredge	Dredge	50	16-50	-14.8208	-173.396	Tonga Forearc
Kall 82	Kall 82	Kallisto	1982	Sample	Dredge	Dredge	46	16-46	-14.7975	-173.425	North Lau Forearc
Kall 82	Kall 82	Kallisto	1982	Sample	Dredge	Dredge	48	16-48	-14.8783	-173.396	Tonga Forearc
Kall 82	Kall 82	Kallisto	1982	Sample	Dredge	Dredge	53	16-53	-14.9162	-173.331	Tonga Forearc
Kall 82	Kall 82	Kallisto	1982	Sample	Dredge	Dredge	49	16-49	-14.9054	-173.384	Tonga Forearc
Kall 82	Kall 82	Kallisto	1982	Sample	Dredge	Dredge	51	16-51	-14.9548	-173.432	Tonga Forearc
Kall 82	Kall 82	Kallisto	1982	Sample	Dredge	Dredge	55	16-55	-14.9069	-173.427	Tonga Forearc
Kall 82	Kall 82	Kallisto	1982	Sample	Dredge	Dredge	54	16-54	-14.9195	-173.449	Tonga Forearc
Kall 82	Kall 82	Kallisto	1982	Sample	Dredge	Dredge	52	16-52	-14.9381	-173.449	Tonga Forearc
Kall 82	Kall 82	Kallisto	1982	Sample	Dredge	Dredge	47	16-47	-14.8124	-173.418	Tonga Forearc
Kall 82	Kall 82	Kallisto	1982	Sample	Dredge	Dredge	10	16-10	-14.4011	-174.46	North Lau Forearc
Kall 82	Kall 82	Kallisto	1982	Sample	Dredge	Dredge	9	16-9	-14.4122	-174.474	North Lau Forearc
Kall 82	Kall 82	Kallisto	1982	Sample	Dredge	Dredge	26	16-26	-14.8937	-173.776	Tonga Forearc
Keldysh/Mir 90	Keldysh/Mir 90	Keldysh	1990	Sample	Manned submersible	Mir Dive	M-2212	M-2212-1	-15.6615	-174.842	Mangatolu
Keldysh/Mir 90	Keldysh/Mir 90	Keldysh	1990	Sample	Manned submersible	Mir Dive	M-2212	M-2212-2	-15.6615	-174.842	Mangatolu
Keldysh/Mir 90	Keldysh/Mir 90	Keldysh	1990	Sample	Manned submersible	Mir Dive	M-2212	M-2212-5	-15.659	-174.852	Fonualei
Keldysh/Mir 90	Keldysh/Mir 90	Keldysh	1990	Sample	Manned submersible	Mir Dive	M-2212	M-2212-6	-15.659	-174.852	Fonualei
Keldysh/Mir 90	Keldysh/Mir 90	Keldysh	1990	Sample	Manned submersible	Mir Dive	M-2212	M-2212-8	-15.6537	-174.893	Fonualei
Keldysh/Mir 90	Keldysh/Mir 90	Keldysh	1990	Sample	Manned submersible	Mir Dive	M-2212	M-2212-10	-15.6512	-174.895	Fonualei
Keldysh/Mir 90	Keldysh/Mir 90	Keldysh	1990	Sample	Manned submersible	Mir Dive	M-2212	M-2212-11	-15.6463	-174.893	Fonualei
Keldysh/Mir 90	Keldysh/Mir 90	Keldysh	1990	Sample	Manned submersible	Mir Dive	M-2218	M-2218-1	-15.627	-174.818	Mangatolu
Keldysh/Mir 90	Keldysh/Mir 90	Keldysh	1990	Sample	Manned submersible	Mir Dive	M-2218	M-2218-2	-15.6265	-174.817	Mangatolu
Keldysh/Mir 90	Keldysh/Mir 90	Keldysh	1990	Sample	Manned submersible	Mir Dive	M-2218	M-2218-3	-15.6533	-174.817	Mangatolu
Keldysh/Mir 90	Keldysh/Mir 90	Keldysh	1990	Sample	Manned submersible	Mir Dive	M-2218	M-2218-4	-15.6533	-174.817	Mangatolu
Keldysh/Mir 90	Keldysh/Mir 90	Keldysh	1990	Sample	Manned submersible	Mir Dive	M-2218	M-2218-5	-15.6192	-174.817	Mangatolu
Keldysh/Mir 90	Keldysh/Mir 90	Keldysh	1990	Sample	Manned submersible	Mir Dive	M-2218	M-2218-7	-15.615	-174.817	Mangatolu
Keldysh/Mir 90	Keldysh/Mir 90	Keldysh	1990	Sample	Manned submersible	Mir Dive	M-2218	M-2218-8	-15.6138	-174.817	Mangatolu
Keldysh/Mir 90	Keldysh/Mir 90	Keldysh	1990	Sample	Manned submersible	Mir Dive	M-2218	M-2218-9	-15.6117	-174.817	Mangatolu
Keldysh/Mir 90	Keldysh/Mir 90	Keldysh	1990	Sample	Manned submersible	Mir Dive	M-2218	M-2218-10	-15.6092	-174.817	Mangatolu
Keldysh/Mir 90	Keldysh/Mir 90	Keldysh	1990	Sample	Manned submersible	Mir Dive	M-2218	M-2218-11	-15.6083	-174.817	Mangatolu
Keldysh/Mir 90	Keldysh/Mir 90	Keldysh	1990	Sample	Manned submersible	Mir Dive	M-2218	M-2218-12	-15.5993	-174.82	Mangatolu
Keldysh/Mir 90	Keldysh/Mir 90	Keldysh	1990	Sample	Manned submersible	Mir Dive	M-2218	M-2218-13	-15.5817	-174.857	North Fonualei
Keldysh/Mir 90	Keldysh/Mir 90	Keldysh	1990	Sample	Manned submersible	Mir Dive	M-2226	M-2226-1a	-15.3883	-174.667	Mangatolu
Keldysh/Mir 90	Keldysh/Mir 90	Keldysh	1990	Sample	Manned submersible	Mir Dive	M-2226	M-2226-14	-15.3933	-174.671	Mangatolu
Keldysh/Mir 90	Keldysh/Mir 90	Keldysh	1990	Sample	Manned submersible	Mir Dive	M-2231	M-2231-1	-18.6197	-176.425	Central Lau Basin
Keldysh/Mir 90	Keldysh/Mir 90	Keldysh	1990	Sample	Manned submersible	Mir Dive	M-2231	M-2231-2	-18.6213	-176.431	Central Lau Basin
Keldysh/Mir 90	Keldysh/Mir 90	Keldysh	1990	Sample	Manned submersible	Mir Dive	M-2231	M-2231-3	-18.6225	-176.435	Central Lau Basin
Keldysh/Mir 90	Keldysh/Mir 90	Keldysh	1990	Sample	Manned submersible	Mir Dive	M-2231	M-2231-5	-18.6118	-176.421	Central Lau Basin
Keldysh/Mir 90	Keldysh/Mir 90	Keldysh	1990	Sample	Manned submersible	Mir Dive	M-2231	M-2231-6	-18.6097	-176.426	Central Lau Basin
Keldysh/Mir 90	Keldysh/Mir 90	Keldysh	1990	Sample	Manned submersible	Mir Dive	M-2231	M-2231-7	-18.607	-176.443	Central Lau Basin
Keldysh/Mir 90	Keldysh/Mir 90	Keldysh	1990	Sample	Manned submersible	Mir Dive	M-2231	M-2231-8	-18.607	-176.443	Central Lau Basin
Keldysh/Mir 90	Keldysh/Mir 90	Keldysh	1990	Sample	Manned submersible	Mir Dive	M-2231	M-2231-13	-18.6072	-176.443	Central Lau Basin
Keldysh/Mir 90	Keldysh/Mir 90	Keldysh	1990	Sample	Manned submersible	Mir Dive	M-2239	M-2239-1	-19.5148	-175.961	East Lau Basin
Keldysh/Mir 90	Keldysh/Mir 90	Keldysh	1990	Sample	Manned submersible	Mir Dive	M-2239	M-2239-2	-19.514	-175.961	East Lau Basin
KK820316	ANZUS CCOP/SOPAC Leg 2 (L5-82-SP)	Kana Keoki	1982	Sample	Dredge	Dredge	RD4	KK820316-RD4	-13.085	-176.21	Melanesian Borderland
KK820316	ANZUS CCOP/SOPAC Leg 2 (L5-82-SP)	Kana Keoki	1982	Sample	Dredge	Dredge	RD5	KK820316-RD5	-15.6583	-178.495	South Futuna
KK820316	ANZUS CCOP/SOPAC Leg 2 (L5-82-SP)	Kana Keoki	1982	Sample	Dredge	Dredge	RD13	KK820316-RD13	-14.48	-177.687	North Futuna
KK820316	ANZUS CCOP/SOPAC Leg 2 (L5-82-SP)	Kana Keoki	1982	Sample	Dredge	Dredge	RD10	KK820316-RD10	-13.3683	-179.275	South Vitiaz
KK820316	ANZUS CCOP/SOPAC Leg 2 (L5-82-SP)	Kana Keoki	1982	Sample	Dredge	Dredge	RD2	KK820316-RD2	-13.0417	-175.638	Melanesian Borderland
KK820316	ANZUS CCOP/SOPAC Leg 2 (L5-82-SP)	Kana Keoki	1982	Sample	Dredge	Dredge	RD3	KK820316-RD3	-12.985	-175.635	Melanesian Borderland
KK820316	ANZUS CCOP/SOPAC Leg 2 (L5-82-SP)	Kana Keoki	1982	Sample	Dredge	Dredge	RD6	KK820316-RD6	-14.4017	-177.875	North Futuna
KK820316	ANZUS CCOP/SOPAC Leg 2 (L5-82-SP)	Kana Keoki	1982	Sample	Dredge	Dredge	RD7	KK820316-RD7	-12.7017	-177.685	Melanesian Borderland
KM0417	Hydrothermal and petrological studies of ELSC	Kilo Moana	2004	Observation	Towcam	Towcam	CT02	CT02-1	-20.3273	-176.148	East Lau Basin
KM0417	Hydrothermal and petrological studies of ELSC	Kilo Moana	2004	Observation	Towcam	Towcam	CT02	CT02-2	-20.3269	-176.147	East Lau Basin
KM0417	Hydrothermal and petrological studies of ELSC	Kilo Moana	2004	Observation	Towcam	Towcam	CT02	CT02-3	-20.3235	-176.143	East Lau Basin
KM0417	Hydrothermal and petrological studies of ELSC	Kilo Moana	2004	Observation	Towcam	Towcam	CT02	CT02-4	-20.3215	-176.139	East Lau Basin
KM0417	Hydrothermal and petrological studies of ELSC	Kilo Moana	2004	Observation	Towcam	Towcam	CT02	CT02-5	-20.3207	-176.139	East Lau Basin
KM0417	Hydrothermal and petrological studies of ELSC	Kilo Moana	2004	Observation	Towcam	Towcam	CT02	CT02-6	-20.32	-176.138	East Lau Basin
KM0417	Hydrothermal and petrological studies of ELSC	Kilo Moana	2004	Observation	Towcam	Towcam	CT02	CT02-7	-20.3168	-176.137	East Lau Basin
KM0417	Hydrothermal and petrological studies of ELSC	Kilo Moana	2004	Observation	Towcam	Towcam	CT02	CT02-8	-20.3157	-176.136	East Lau Basin
KM0417	Hydrothermal and petrological studies of ELSC	Kilo Moana	2004	Observation	Towcam	Towcam	CT07	CT07-1	-20.3381	-176.144	East Lau Basin
KM0417	Hydrothermal and petrological studies of ELSC	Kilo Moana	2004	Observation	Towcam	Towcam	CT07	CT07-2	-20.3351	-176.143	East Lau Basin
KM0417	Hydrothermal and petrological studies of ELSC	Kilo Moana	2004	Observation	Towcam	Towcam	CT07	CT07-3	-20.3323	-176.143	East Lau Basin
KM0417	Hydrothermal and petrological studies of ELSC	Kilo Moana	2004	Observation	Towcam	Towcam	CT07	CT07-4	-20.3289	-176.141	East Lau Basin
KM0417	Hydrothermal and petrological studies of ELSC	Kilo Moana	2004	Observation	Towcam	Towcam	CT07	CT07-5	-20.3274	-176.141	East Lau Basin
KM0417	Hydrothermal and petrological studies of ELSC	Kilo Moana	2004	Observation	Towcam	Towcam	CT07	CT07-6	-20.3259	-176.14	East Lau Basin
KM0417	Hydrothermal and petrological studies of ELSC	Kilo Moana	2004	Observation	Towcam	Towcam	CT07	CT07-7	-20.3237	-176.139	East Lau Basin
KM0417	Hydrothermal and petrological studies of ELSC	Kilo Moana	2004	Observation	Towcam	Towcam	CT07	CT07-8	-20.3233	-176.139	East Lau Basin
KM0417	Hydrothermal and petrological studies of ELSC	Kilo Moana	2004	Observation	Towcam	Towcam	CT01	CT01-1	-20.063	-176.131	East Lau Basin
KM0417	Hydrothermal and petrological studies of ELSC	Kilo Moana	2004	Observation	Towcam	Towcam	CT01	CT01-2	-20.0579	-176.128	East Lau Basin
KM0417	Hydrothermal and petrological studies of ELSC	Kilo Moana	2004	Observation	Towcam	Towcam	CT01	CT01-3	-20.0652	-176.131	East Lau Basin
KM0417	Hydrothermal and petrological studies of ELSC	Kilo Moana	2004	Observation	Towcam	Towcam	CT01	CT01-4	-20.0681	-176.131	East Lau Basin
KM0417	Hydrothermal and petrological studies of ELSC	Kilo Moana	2004	Observation	Towcam	Towcam	CT01	CT01-5	-20.0683	-176.132	East Lau Basin
KM0417	Hydrothermal and petrological studies of ELSC	Kilo Moana	2004	Observation	Towcam	Towcam	CT01	CT01-6	-20.07	-176.132	East Lau Basin
KM0417	Hydrothermal and petrological studies of ELSC	Kilo Moana	2004	Observation	Towcam	Towcam	CT01	CT01-7	-20.0784	-176.138	East Lau Basin
KM0417	Hydrothermal and petrological studies of ELSC	Kilo Moana	2004	Observation	Towcam	Towcam	CT01	CT01-8	-20.0834	-176.141	East Lau Basin
KM0417	Hydrothermal and petrological studies of ELSC	Kilo Moana	2004	Observation	Towcam	Towcam	CT10	CT10-1	-20.053	-176.132	East Lau Basin
KM0417	Hydrothermal and petrological studies of ELSC	Kilo Moana	2004	Observation	Towcam	Towcam	CT10	CT10-2	-20.0552	-176.134	East Lau Basin
KM0417	Hydrothermal and petrological studies of ELSC	Kilo Moana	2004	Observation	Towcam	Towcam	CT10	CT10-3	-20.0532	-176.133	East Lau Basin
KM0417	Hydrothermal and petrological studies of ELSC	Kilo Moana	2004	Observation	Towcam	Towcam	CT10	CT10-4	-19.55	-175.971	East Lau Basin
KM0417	Hydrothermal and petrological studies of ELSC	Kilo Moana	2004	Observation	Towcam	Towcam	CT10	CT10-5	-20.0533	-176.133	East Lau Basin
KM0417	Hydrothermal and petrological studies of ELSC	Kilo Moana	2004	Observation	Towcam	Towcam	CT10	CT10-6	-20.07	-176.132	East Lau Basin
KM0417	Hydrothermal and petrological studies of ELSC	Kilo Moana	2004	Observation	Towcam	Towcam	CT10	CT10-7	-20.0557	-176.133	East Lau Basin
KM0417	Hydrothermal and petrological studies of ELSC	Kilo Moana	2004	Observation	Towcam	Towcam	CT10	CT10-8	-19.911	-176.106	East Lau Basin
KM0417	Hydrothermal and petrological studies of ELSC	Kilo Moana	2004	Sample	Dredge	Dredge	DR02	DR02	-20.0584	-176.128	East Lau Basin
KM0417	Hydrothermal and petrological studies of ELSC	Kilo Moana	2004	Sample	Dredge	Dredge	DR03	DR03	-19.0788	-175.068	Tofua Arc
KM0417	Hydrothermal and petrological studies of ELSC	Kilo Moana	2004	Sample	Dredge	Dredge	DR04	DR04	-19.62	-175.986	East Lau Basin
KM0417	Hydrothermal and petrological studies of ELSC	Kilo Moana	2004	Sample	Dredge	Dredge	DR05	DR05	-19.4413	-175.959	East Lau Basin
KM0417	Hydrothermal and petrological studies of ELSC	Kilo Moana	2004	Sample	Dredge	Dredge	DR06	DR06	-20.1115	-176.064	East Lau Basin
KM0417	Hydrothermal and petrological studies of ELSC	Kilo Moana	2004	Sample	Dredge	Dredge	DR07	DR07	-21.1025	-176.287	East Lau Basin
KM0417	Hydrothermal and petrological studies of ELSC	Kilo Moana	2004	Sample	Dredge	Dredge	DR08	DR08	-19.9597	-176.092	East Lau Basin
KM0417	Hydrothermal and petrological studies of ELSC	Kilo Moana	2004	Sample	Dredge	Dredge	DR09	DR09	-22.3198	-176.597	East Lau Basin
KM0417	Hydrothermal and petrological studies of ELSC	Kilo Moana	2004	Sample	Dredge	Dredge	DR10	DR10	-20.3823	-176.161	East Lau Basin
KM0417	Hydrothermal and petrological studies of ELSC	Kilo Moana	2004	Sample	Dredge	Dredge	DR11	DR11	-20.3165	-176.143	East Lau Basin
KM0417	Hydrothermal and petrological studies of ELSC	Kilo Moana	2004	Sample	Dredge	Dredge	DR12	DR12	-22.135	-176.598	East Lau Basin
KM0417	Hydrothermal and petrological studies of ELSC	Kilo Moana	2004	Sample	Dredge	Dredge	DR13	DR13	-21.7489	-176.404	East Lau Basin
KM0417	Hydrothermal and petrological studies of ELSC	Kilo Moana	2004	Sample	Dredge	Dredge	DR14	DR14	-21.086	-176.282	East Lau Basin
KM0417	Hydrothermal and petrological studies of ELSC	Kilo Moana	2004	Sample	Dredge	Dredge	DR15	DR15	-21.7433	-176.29	East Lau Basin
KM0417	Hydrothermal and petrological studies of ELSC	Kilo Moana	2004	Sample	Dredge	Dredge	DR16	DR16	-22.1959	-176.626	East Lau Basin
KM0417	Hydrothermal and petrological studies of ELSC	Kilo Moana	2004	Sample	Dredge	Dredge	DR17	DR17	-22.1203	-176.542	East Lau Basin
KM0417	Hydrothermal and petrological studies of ELSC	Kilo Moana	2004	Sample	Dredge	Dredge	DR18	DR18	-21.7921	-176.475	East Lau Basin
KM0417	Hydrothermal and petrological studies of ELSC	Kilo Moana	2004	Sample	Dredge	Dredge	DR19	DR19	-22.1553	-176.578	East Lau Basin
KM0417	Hydrothermal and petrological studies of ELSC	Kilo Moana	2004	Sample	Dredge	Dredge	DR20	DR20	-22.076	-176.509	East Lau Basin
KM0417	Hydrothermal and petrological studies of ELSC	Kilo Moana	2004	Sample	Dredge	Dredge	DR21	DR21	-22.1568	-176.602	East Lau Basin
KM0417	Hydrothermal and petrological studies of ELSC	Kilo Moana	2004	Sample	Dredge	Dredge	DR22	DR22	-21.8076	-176.383	East Lau Basin
KM0417	Hydrothermal and petrological studies of ELSC	Kilo Moana	2004	Sample	Dredge	Dredge	DR23	DR23	-21.5683	-176.317	East Lau Basin
KM0417	Hydrothermal and petrological studies of ELSC	Kilo Moana	2004	Sample	Dredge	Dredge	DR24	DR24	-21.7473	-176.359	East Lau Basin
KM0417	Hydrothermal and petrological studies of ELSC	Kilo Moana	2004	Sample	Dredge	Dredge	DR25	DR25	-21.4702	-176.28	East Lau Basin
KM0417	Hydrothermal and petrological studies of ELSC	Kilo Moana	2004	Sample	Dredge	Dredge	DR26	DR26	-21.4015	-176.38	East Lau Basin
KM0417	Hydrothermal and petrological studies of ELSC	Kilo Moana	2004	Sample	Dredge	Dredge	DR27	DR27	-21.2918	-176.225	East Lau Basin
KM0417	Hydrothermal and petrological studies of ELSC	Kilo Moana	2004	Sample	Dredge	Dredge	DR28	DR28	-21.015	-176.091	East Lau Basin
KM0417	Hydrothermal and petrological studies of ELSC	Kilo Moana	2004	Sample	Dredge	Dredge	DR29	DR29	-20.9005	-176.099	East Lau Basin
KM0417	Hydrothermal and petrological studies of ELSC	Kilo Moana	2004	Sample	Dredge	Dredge	DR30	DR30	-20.5346	-176.154	East Lau Basin
KM0417	Hydrothermal and petrological studies of ELSC	Kilo Moana	2004	Sample	Dredge	Dredge	DR31	DR31	-20.5196	-176.204	East Lau Basin
KM0417	Hydrothermal and petrological studies of ELSC	Kilo Moana	2004	Sample	Dredge	Dredge	DR32	DR32	-20.6172	-176.176	East Lau Basin
KM0417	Hydrothermal and petrological studies of ELSC	Kilo Moana	2004	Sample	Dredge	Dredge	DR33	DR33	-20.6596	-175.997	East Lau Basin
KM0417	Hydrothermal and petrological studies of ELSC	Kilo Moana	2004	Sample	Dredge	Dredge	DR34	DR34	-20.5913	-175.999	East Lau Basin
KM0417	Hydrothermal and petrological studies of ELSC	Kilo Moana	2004	Sample	Dredge	Dredge	DR35	DR35	-20.4045	-175.938	East Lau Basin
KM0417	Hydrothermal and petrological studies of ELSC	Kilo Moana	2004	Sample	Dredge	Dredge	DR36	DR36	-20.2919	-176	East Lau Basin
KM0417	Hydrothermal and petrological studies of ELSC	Kilo Moana	2004	Sample	Dredge	Dredge	DR37	DR37	-19.8956	-176.087	East Lau Basin
KM0417	Hydrothermal and petrological studies of ELSC	Kilo Moana	2004	Sample	Dredge	Dredge	DR38	DR38	-20.1733	-175.999	East Lau Basin
KM0417	Hydrothermal and petrological studies of ELSC	Kilo Moana	2004	Sample	Dredge	Dredge	DR39	DR39	-20.423	-176.05	East Lau Basin
KM0417	Hydrothermal and petrological studies of ELSC	Kilo Moana	2004	Sample	Dredge	Dredge	DR40	DR40	-20.7618	-176.191	East Lau Basin
KM0417	Hydrothermal and petrological studies of ELSC	Kilo Moana	2004	Sample	Dredge	Dredge	DR41	DR41	-20.7621	-176.19	East Lau Basin
KM0417	Hydrothermal and petrological studies of ELSC	Kilo Moana	2004	Sample	Dredge	Dredge	DR42	DR42	-20.0501	-176.134	East Lau Basin
KM0417	Hydrothermal and petrological studies of ELSC	Kilo Moana	2004	Sample	Dredge	Dredge	DR43	DR43	-20.32	-176.139	East Lau Basin
KM0417	Hydrothermal and petrological studies of ELSC	Kilo Moana	2004	Sample	Dredge	Dredge	DR44	DR44	-19.7508	-175.76	East Lau Basin
KM0417	Hydrothermal and petrological studies of ELSC	Kilo Moana	2004	Sample	Dredge	Dredge	DR45	DR45	-19.494	-175.669	East Lau Basin
KM0417	Hydrothermal and petrological studies of ELSC	Kilo Moana	2004	Sample	Dredge	Dredge	DR46	DR46	-19.4636	-175.761	East Lau Basin
KM0417	Hydrothermal and petrological studies of ELSC	Kilo Moana	2004	Sample	Dredge	Dredge	DR47	DR47	-17.8221	-174.532	Fonualei
KM0417	Hydrothermal and petrological studies of ELSC	Kilo Moana	2004	Sample	Dredge	Dredge	DR48	DR48	-17.3896	-174.588	Fonualei
KM0417	Hydrothermal and petrological studies of ELSC	Kilo Moana	2004	Sample	Dredge	Dredge	DR49	DR49	-16.4915	-174.545	Fonualei
KM0417	Hydrothermal and petrological studies of ELSC	Kilo Moana	2004	Sample	Dredge	Dredge	DR50	DR50	-15.9332	-174.604	Fonualei
KM0417	Hydrothermal and petrological studies of ELSC	Kilo Moana	2004	Sample	Dredge	Dredge	DR51	DR51	-14.8918	-174.012	Northeast Lau
KM0417	Hydrothermal and petrological studies of ELSC	Kilo Moana	2004	Sample	Dredge	Dredge	DR52	DR52	-15.183	-174.165	Northeast Lau
KM0417	Hydrothermal and petrological studies of ELSC	Kilo Moana	2004	Sample	Dredge	Dredge	DR53	DR53	-19.1667	-176.142	East Lau Basin
KM0417	Hydrothermal and petrological studies of ELSC	Kilo Moana	2004	Sample	Dredge	Dredge	DR54	DR54	-19.2367	-176.143	East Lau Basin
KM0417	Hydrothermal and petrological studies of ELSC	Kilo Moana	2004	Sample	Dredge	Dredge	DR55	DR55	-19.38	-175.958	East Lau Basin
KM0417	Hydrothermal and petrological studies of ELSC	Kilo Moana	2004	Sample	Dredge	Dredge	DR56	DR56	-19.3965	-175.96	East Lau Basin
KM0417	Hydrothermal and petrological studies of ELSC	Kilo Moana	2004	Sample	Dredge	Dredge	DR57	DR57	-19.55	-175.971	East Lau Basin
KM0417	Hydrothermal and petrological studies of ELSC	Kilo Moana	2004	Sample	Dredge	Dredge	DR58	DR58	-19.5851	-175.976	East Lau Basin
KM0417	Hydrothermal and petrological studies of ELSC	Kilo Moana	2004	Sample	Dredge	Dredge	DR59	DR59	-19.6518	-175.993	East Lau Basin
KM0417	Hydrothermal and petrological studies of ELSC	Kilo Moana	2004	Sample	Dredge	Dredge	DR60	DR60	-19.7333	-176.017	East Lau Basin
KM0417	Hydrothermal and petrological studies of ELSC	Kilo Moana	2004	Sample	Dredge	Dredge	DR61	DR61	-19.8499	-176.05	East Lau Basin
KM0417	Hydrothermal and petrological studies of ELSC	Kilo Moana	2004	Sample	Dredge	Dredge	DR62	DR62	-19.8998	-176.067	East Lau Basin
KM0417	Hydrothermal and petrological studies of ELSC	Kilo Moana	2004	Sample	Rock core	Rock core	RC002	RC002	-20.0633	-176.13	East Lau Basin
KM0417	Hydrothermal and petrological studies of ELSC	Kilo Moana	2004	Sample	Rock core	Rock core	RC003	RC003	-19.1667	-176.142	East Lau Basin
KM0417	Hydrothermal and petrological studies of ELSC	Kilo Moana	2004	Sample	Rock core	Rock core	RC004	RC004	-19.2367	-176.143	East Lau Basin
KM0417	Hydrothermal and petrological studies of ELSC	Kilo Moana	2004	Sample	Rock core	Rock core	RC005	RC005	-19.38	-175.958	East Lau Basin
KM0417	Hydrothermal and petrological studies of ELSC	Kilo Moana	2004	Sample	Rock core	Rock core	RC006	RC006	-19.3965	-175.96	East Lau Basin
KM0417	Hydrothermal and petrological studies of ELSC	Kilo Moana	2004	Sample	Rock core	Rock core	RC007	RC007	-19.55	-175.971	East Lau Basin
KM0417	Hydrothermal and petrological studies of ELSC	Kilo Moana	2004	Sample	Rock core	Rock core	RC008	RC008	-19.5851	-175.976	East Lau Basin
KM0417	Hydrothermal and petrological studies of ELSC	Kilo Moana	2004	Sample	Rock core	Rock core	RC009	RC009	-19.6518	-175.993	East Lau Basin
KM0417	Hydrothermal and petrological studies of ELSC	Kilo Moana	2004	Sample	Rock core	Rock core	RC010	RC010	-19.7333	-176.017	East Lau Basin
KM0417	Hydrothermal and petrological studies of ELSC	Kilo Moana	2004	Sample	Rock core	Rock core	RC011	RC011	-19.8499	-176.05	East Lau Basin
KM0417	Hydrothermal and petrological studies of ELSC	Kilo Moana	2004	Sample	Rock core	Rock core	RC012	RC012	-19.8998	-176.067	East Lau Basin
KM0417	Hydrothermal and petrological studies of ELSC	Kilo Moana	2004	Sample	Rock core	Rock core	RC013	RC013	-20.1545	-176.145	East Lau Basin
KM0417	Hydrothermal and petrological studies of ELSC	Kilo Moana	2004	Sample	Rock core	Rock core	RC014	RC014	-20.1402	-176.144	East Lau Basin
KM0417	Hydrothermal and petrological studies of ELSC	Kilo Moana	2004	Sample	Rock core	Rock core	RC015	RC015	-20.1035	-176.14	East Lau Basin
KM0417	Hydrothermal and petrological studies of ELSC	Kilo Moana	2004	Sample	Rock core	Rock core	RC016	RC016	-20.0832	-176.136	East Lau Basin
KM0417	Hydrothermal and petrological studies of ELSC	Kilo Moana	2004	Sample	Rock core	Rock core	RC017	RC017	-20.0847	-176.142	East Lau Basin
KM0417	Hydrothermal and petrological studies of ELSC	Kilo Moana	2004	Sample	Rock core	Rock core	RC018	RC018	-20.0593	-176.133	East Lau Basin
KM0417	Hydrothermal and petrological studies of ELSC	Kilo Moana	2004	Sample	Rock core	Rock core	RC019	RC019	-20.0705	-176.132	East Lau Basin
KM0417	Hydrothermal and petrological studies of ELSC	Kilo Moana	2004	Sample	Rock core	Rock core	RC020	RC020	-20.0636	-176.136	East Lau Basin
KM0417	Hydrothermal and petrological studies of ELSC	Kilo Moana	2004	Sample	Rock core	Rock core	RC021	RC021	-20.0633	-176.131	East Lau Basin
KM0417	Hydrothermal and petrological studies of ELSC	Kilo Moana	2004	Sample	Rock core	Rock core	RC022	RC022	-20.0447	-176.124	East Lau Basin
KM0417	Hydrothermal and petrological studies of ELSC	Kilo Moana	2004	Sample	Rock core	Rock core	RC023	RC023	-20.0713	-176.138	East Lau Basin
KM0417	Hydrothermal and petrological studies of ELSC	Kilo Moana	2004	Sample	Rock core	Rock core	RC024	RC024	-20.3333	-176.143	East Lau Basin
KM0417	Hydrothermal and petrological studies of ELSC	Kilo Moana	2004	Sample	Rock core	Rock core	RC025	RC025	-20.3298	-176.143	East Lau Basin
KM0417	Hydrothermal and petrological studies of ELSC	Kilo Moana	2004	Sample	Rock core	Rock core	RC026	RC026	-20.3248	-176.142	East Lau Basin
KM0417	Hydrothermal and petrological studies of ELSC	Kilo Moana	2004	Sample	Rock core	Rock core	RC027	RC027	-20.3381	-176.145	East Lau Basin
KM0417	Hydrothermal and petrological studies of ELSC	Kilo Moana	2004	Sample	Rock core	Rock core	RC028	RC028	-20.3495	-176.149	East Lau Basin
KM0417	Hydrothermal and petrological studies of ELSC	Kilo Moana	2004	Sample	Rock core	Rock core	RC029	RC029	-20.3404	-176.148	East Lau Basin
KM0417	Hydrothermal and petrological studies of ELSC	Kilo Moana	2004	Sample	Rock core	Rock core	RC030	RC030	-20.2019	-176.099	East Lau Basin
KM0417	Hydrothermal and petrological studies of ELSC	Kilo Moana	2004	Sample	Rock core	Rock core	RC031	RC031	-20.2465	-176.111	East Lau Basin
KM0417	Hydrothermal and petrological studies of ELSC	Kilo Moana	2004	Sample	Rock core	Rock core	RC032	RC032	-20.5818	-176.16	East Lau Basin
KM0417	Hydrothermal and petrological studies of ELSC	Kilo Moana	2004	Sample	Rock core	Rock core	RC033	RC033	-20.7341	-176.184	East Lau Basin
KM0417	Hydrothermal and petrological studies of ELSC	Kilo Moana	2004	Sample	Rock core	Rock core	RC034	RC034	-20.7523	-176.186	East Lau Basin
KM0417	Hydrothermal and petrological studies of ELSC	Kilo Moana	2004	Sample	Rock core	Rock core	RC035	RC035	-20.7532	-176.187	East Lau Basin
KM0417	Hydrothermal and petrological studies of ELSC	Kilo Moana	2004	Sample	Rock core	Rock core	RC036	RC036	-20.9334	-176.236	East Lau Basin
KM0417	Hydrothermal and petrological studies of ELSC	Kilo Moana	2004	Sample	Rock core	Rock core	RC037	RC037	-20.8716	-176.218	East Lau Basin
KM0417	Hydrothermal and petrological studies of ELSC	Kilo Moana	2004	Sample	Rock core	Rock core	RC038	RC038	-20.8333	-176.208	East Lau Basin
KM0417	Hydrothermal and petrological studies of ELSC	Kilo Moana	2004	Sample	Rock core	Rock core	RC039	RC039	-21.1086	-176.292	East Lau Basin
KM0417	Hydrothermal and petrological studies of ELSC	Kilo Moana	2004	Sample	Rock core	Rock core	RC040	RC040	-21.0989	-176.286	East Lau Basin
KM0417	Hydrothermal and petrological studies of ELSC	Kilo Moana	2004	Sample	Rock core	Rock core	RC041	RC041	-21.0957	-176.286	East Lau Basin
KM0417	Hydrothermal and petrological studies of ELSC	Kilo Moana	2004	Sample	Rock core	Rock core	RC042	RC042	-21.1038	-176.29	East Lau Basin
KM0417	Hydrothermal and petrological studies of ELSC	Kilo Moana	2004	Sample	Rock core	Rock core	RC043	RC043	-21.0671	-176.067	East Lau Basin
KM0417	Hydrothermal and petrological studies of ELSC	Kilo Moana	2004	Sample	Rock core	Rock core	RC044	RC044	-20.9952	-176.253	East Lau Basin
KM0417	Hydrothermal and petrological studies of ELSC	Kilo Moana	2004	Sample	Rock core	Rock core	RC045	RC045	-21.0319	-176.264	East Lau Basin
KM0417	Hydrothermal and petrological studies of ELSC	Kilo Moana	2004	Sample	Rock core	Rock core	RC046	RC046	-21.2499	-176.339	East Lau Basin
KM0417	Hydrothermal and petrological studies of ELSC	Kilo Moana	2004	Sample	Rock core	Rock core	RC047	RC047	-21.1967	-176.326	East Lau Basin
KM0417	Hydrothermal and petrological studies of ELSC	Kilo Moana	2004	Sample	Rock core	Rock core	RC048	RC048	-21.1565	-176.312	East Lau Basin
KM0417	Hydrothermal and petrological studies of ELSC	Kilo Moana	2004	Sample	Rock core	Rock core	RC049	RC049	-21.1499	-176.309	East Lau Basin
KM0417	Hydrothermal and petrological studies of ELSC	Kilo Moana	2004	Sample	Rock core	Rock core	RC050	RC050	-21.1425	-176.307	East Lau Basin
KM0417	Hydrothermal and petrological studies of ELSC	Kilo Moana	2004	Sample	Rock core	Rock core	RC051	RC051	-21.3404	-176.365	East Lau Basin
KM0417	Hydrothermal and petrological studies of ELSC	Kilo Moana	2004	Sample	Rock core	Rock core	RC052	RC052	-21.4998	-176.388	East Lau Basin
KM0417	Hydrothermal and petrological studies of ELSC	Kilo Moana	2004	Sample	Rock core	Rock core	RC053	RC053	-21.6613	-176.429	East Lau Basin
KM0417	Hydrothermal and petrological studies of ELSC	Kilo Moana	2004	Sample	Rock core	Rock core	RC054	RC054	-21.8335	-176.487	East Lau Basin
KM0417	Hydrothermal and petrological studies of ELSC	Kilo Moana	2004	Sample	Rock core	Rock core	RC055	RC055	-22.1438	-176.598	East Lau Basin
KM0417	Hydrothermal and petrological studies of ELSC	Kilo Moana	2004	Sample	Rock core	Rock core	RC056	RC056	-22.1498	-176.591	East Lau Basin
KM0417	Hydrothermal and petrological studies of ELSC	Kilo Moana	2004	Sample	Rock core	Rock core	RC057	RC057	-22.1333	-176.612	East Lau Basin
KM0417	Hydrothermal and petrological studies of ELSC	Kilo Moana	2004	Sample	Rock core	Rock core	RC058	RC058	-22.1192	-176.608	East Lau Basin
KM0417	Hydrothermal and petrological studies of ELSC	Kilo Moana	2004	Sample	Rock core	Rock core	RC059	RC059	-22.1037	-176.604	East Lau Basin
KM0417	Hydrothermal and petrological studies of ELSC	Kilo Moana	2004	Sample	Rock core	Rock core	RC060	RC060	-22.0002	-176.567	East Lau Basin
KM0417	Hydrothermal and petrological studies of ELSC	Kilo Moana	2004	Sample	Rock core	Rock core	RC061	RC061	-22.0666	-176.591	East Lau Basin
KM0417	Hydrothermal and petrological studies of ELSC	Kilo Moana	2004	Sample	Rock core	Rock core	RC062	RC062	-22.093	-176.592	East Lau Basin
KM0417	Hydrothermal and petrological studies of ELSC	Kilo Moana	2004	Sample	Rock core	Rock core	RC063	RC063	-22.1432	-176.612	East Lau Basin
KM0417	Hydrothermal and petrological studies of ELSC	Kilo Moana	2004	Sample	Rock core	Rock core	RC064	RC064	-22.1333	-176.598	East Lau Basin
KM0417	Hydrothermal and petrological studies of ELSC	Kilo Moana	2004	Sample	Rock core	Rock core	RC065	RC065	-22.1207	-176.623	East Lau Basin
KM0417	Hydrothermal and petrological studies of ELSC	Kilo Moana	2004	Sample	Rock core	Rock core	RC066	RC066	-21.8081	-176.482	East Lau Basin
KM0417	Hydrothermal and petrological studies of ELSC	Kilo Moana	2004	Sample	Rock core	Rock core	RC067	RC067	-21.8667	-176.506	East Lau Basin
KM0417	Hydrothermal and petrological studies of ELSC	Kilo Moana	2004	Sample	Rock core	Rock core	RC068	RC068	-21.9136	-176.526	East Lau Basin
KM0417	Hydrothermal and petrological studies of ELSC	Kilo Moana	2004	Sample	Rock core	Rock core	RC069	RC069	-21.9416	-176.54	East Lau Basin
KM0417	Hydrothermal and petrological studies of ELSC	Kilo Moana	2004	Sample	Rock core	Rock core	RC070	RC070	-21.7416	-176.459	East Lau Basin
KM0417	Hydrothermal and petrological studies of ELSC	Kilo Moana	2004	Sample	Rock core	Rock core	RC071	RC071	-21.6939	-176.441	East Lau Basin
KM0417	Hydrothermal and petrological studies of ELSC	Kilo Moana	2004	Sample	Rock core	Rock core	RC072	RC072	-21.6	-176.412	East Lau Basin
KM0417	Hydrothermal and petrological studies of ELSC	Kilo Moana	2004	Sample	Rock core	Rock core	RC073	RC073	-21.4576	-176.375	East Lau Basin
KM0417	Hydrothermal and petrological studies of ELSC	Kilo Moana	2004	Sample	Rock core	Rock core	RC074	RC074	-21.2852	-176.353	East Lau Basin
KM0417	Hydrothermal and petrological studies of ELSC	Kilo Moana	2004	Sample	Rock core	Rock core	RC075	RC075	-20.3	-176.132	East Lau Basin
KM0417	Hydrothermal and petrological studies of ELSC	Kilo Moana	2004	Sample	Rock core	Rock core	RC076	RC076	-20.3575	-176.151	East Lau Basin
KM0417	Hydrothermal and petrological studies of ELSC	Kilo Moana	2004	Sample	Rock core	Rock core	RC077	RC077	-20.3638	-176.155	East Lau Basin
KM0417	Hydrothermal and petrological studies of ELSC	Kilo Moana	2004	Sample	Rock core	Rock core	RC078	RC078	-20.3333	-176.149	East Lau Basin
KM0417	Hydrothermal and petrological studies of ELSC	Kilo Moana	2004	Sample	Rock core	Rock core	RC079	RC079	-20.4831	-176.189	East Lau Basin
KM0417	Hydrothermal and petrological studies of ELSC	Kilo Moana	2004	Sample	Rock core	Rock core	RC080	RC080	-20.5926	-176.163	East Lau Basin
KM0417	Hydrothermal and petrological studies of ELSC	Kilo Moana	2004	Sample	Rock core	Rock core	RC081	RC081	-20.6167	-176.164	East Lau Basin
KM0417	Hydrothermal and petrological studies of ELSC	Kilo Moana	2004	Sample	Rock core	Rock core	RC082	RC082	-20.6998	-176.175	East Lau Basin
KM0417	Hydrothermal and petrological studies of ELSC	Kilo Moana	2004	Sample	Rock core	Rock core	RC083	RC083	-20.7681	-176.192	East Lau Basin
KM0417	Hydrothermal and petrological studies of ELSC	Kilo Moana	2004	Sample	Rock core	Rock core	RC084	RC084	-20.6983	-176.186	East Lau Basin
KM0417	Hydrothermal and petrological studies of ELSC	Kilo Moana	2004	Sample	Rock core	Rock core	RC085	RC085	-20.7175	-176.193	East Lau Basin
KM0417	Hydrothermal and petrological studies of ELSC	Kilo Moana	2004	Sample	Rock core	Rock core	RC086	RC086	-20.7583	-176.19	East Lau Basin
KM0417	Hydrothermal and petrological studies of ELSC	Kilo Moana	2004	Sample	Rock core	Rock core	RC087	RC087	-20.6336	-176.169	East Lau Basin
KM0417	Hydrothermal and petrological studies of ELSC	Kilo Moana	2004	Sample	Rock core	Rock core	RC088	RC088	-20.7115	-176.176	East Lau Basin
KM0417	Hydrothermal and petrological studies of ELSC	Kilo Moana	2004	Sample	Rock core	Rock core	RC089	RC089	-20.7262	-176.179	East Lau Basin
KM0417	Hydrothermal and petrological studies of ELSC	Kilo Moana	2004	Sample	Rock core	Rock core	RC090	RC090	-20.0461	-176.122	East Lau Basin
KM0417	Hydrothermal and petrological studies of ELSC	Kilo Moana	2004	Sample	Rock core	Rock core	RC091	RC091	-20.0532	-176.132	East Lau Basin
KM0417	Hydrothermal and petrological studies of ELSC	Kilo Moana	2004	Sample	Rock core	Rock core	RC092	RC092	-20.0591	-176.133	East Lau Basin
KM0417	Hydrothermal and petrological studies of ELSC	Kilo Moana	2004	Sample	Rock core	Rock core	RC093	RC093	-20.0331	-176.126	East Lau Basin
KM0417	Hydrothermal and petrological studies of ELSC	Kilo Moana	2004	Sample	Rock core	Rock core	RC094	RC094	-20.019	-176.121	East Lau Basin
KM0417	Hydrothermal and petrological studies of ELSC	Kilo Moana	2004	Sample	Rock core	Rock core	RC095	RC095	-20.2666	-176.122	East Lau Basin
KM0417	Hydrothermal and petrological studies of ELSC	Kilo Moana	2004	Sample	Rock core	Rock core	RC096	RC096	-20.2916	-176.126	East Lau Basin
KM0417	Hydrothermal and petrological studies of ELSC	Kilo Moana	2004	Sample	Rock core	Rock core	RC097	RC097	-20.3166	-176.137	East Lau Basin
KM0417	Hydrothermal and petrological studies of ELSC	Kilo Moana	2004	Sample	Rock core	Rock core	RC098	RC098	-20.4162	-176.167	East Lau Basin
KM0417	Hydrothermal and petrological studies of ELSC	Kilo Moana	2004	Sample	Rock core	Rock core	RC099	RC099	-20.4304	-176.172	East Lau Basin
KM0417	Hydrothermal and petrological studies of ELSC	Kilo Moana	2004	Sample	Rock core	Rock core	RC100	RC100	-20.4446	-176.175	East Lau Basin
KM0417	Hydrothermal and petrological studies of ELSC	Kilo Moana	2004	Sample	Rock core	Rock core	RC101	RC101	-20.5124	-176.196	East Lau Basin
KM0417	Hydrothermal and petrological studies of ELSC	Kilo Moana	2004	Sample	Rock core	Rock core	RC102	RC102	-20.5131	-176.155	East Lau Basin
KM0417	Hydrothermal and petrological studies of ELSC	Kilo Moana	2004	Sample	Rock core	Rock core	RC103	RC103	-20.493	-176.15	East Lau Basin
KM0417	Hydrothermal and petrological studies of ELSC	Kilo Moana	2004	Sample	Rock core	Rock core	RC104	RC104	-20.48	-176.145	East Lau Basin
KM0417	Hydrothermal and petrological studies of ELSC	Kilo Moana	2004	Sample	Rock core	Rock core	RC105	RC105	-20.4588	-176.141	East Lau Basin
KM0417	Hydrothermal and petrological studies of ELSC	Kilo Moana	2004	Sample	Rock core	Rock core	RC106	RC106	-20.4275	-176.153	East Lau Basin
KM0417	Hydrothermal and petrological studies of ELSC	Kilo Moana	2004	Sample	Rock core	Rock core	RC107	RC107	-20.2846	-176.118	East Lau Basin
KM0417	Hydrothermal and petrological studies of ELSC	Kilo Moana	2004	Sample	Rock core	Rock core	RC108	RC108	-20.7624	-176.19	East Lau Basin
KM0417	Hydrothermal and petrological studies of ELSC	Kilo Moana	2004	Sample	Rock core	Rock core	RC109	RC109	-20.7557	-176.187	East Lau Basin
KM0417	Hydrothermal and petrological studies of ELSC	Kilo Moana	2004	Sample	Rock core	Rock core	RC110	RC110	-20.7742	-176.194	East Lau Basin
KM0417	Hydrothermal and petrological studies of ELSC	Kilo Moana	2004	Sample	Rock core	Rock core	RC111	RC111	-20.7764	-176.191	East Lau Basin
KM0417	Hydrothermal and petrological studies of ELSC	Kilo Moana	2004	Sample	Rock core	Rock core	RC112	RC112	-20.7683	-176.193	East Lau Basin
KM0417	Hydrothermal and petrological studies of ELSC	Kilo Moana	2004	Sample	Rock core	Rock core	RC113	RC113	-20.7688	-176.19	East Lau Basin
KM0417	Hydrothermal and petrological studies of ELSC	Kilo Moana	2004	Sample	Rock core	Rock core	RC114	RC114	-20.0333	-176.117	East Lau Basin
KM0417	Hydrothermal and petrological studies of ELSC	Kilo Moana	2004	Sample	Rock core	Rock core	RC115	RC115	-20.1815	-176.153	East Lau Basin
KM0417	Hydrothermal and petrological studies of ELSC	Kilo Moana	2004	Sample	Rock core	Rock core	RC116	RC116	-20.0524	-176.131	East Lau Basin
KM0417	Hydrothermal and petrological studies of ELSC	Kilo Moana	2004	Sample	Rock core	Rock core	RC117	RC117	-20.0414	-176.129	East Lau Basin
KM0417	Hydrothermal and petrological studies of ELSC	Kilo Moana	2004	Sample	Rock core	Rock core	RC118	RC118	-20.0367	-176.122	East Lau Basin
KM0417	Hydrothermal and petrological studies of ELSC	Kilo Moana	2004	Sample	Rock core	Rock core	RC119	RC119	-20.0175	-176.114	East Lau Basin
KM0417	Hydrothermal and petrological studies of ELSC	Kilo Moana	2004	Sample	Rock core	Rock core	RC120	RC120	-20.0012	-176.108	East Lau Basin
KM0417	Hydrothermal and petrological studies of ELSC	Kilo Moana	2004	Sample	Rock core	Rock core	RC121	RC121	-19.9949	-176.106	East Lau Basin
KM0417	Hydrothermal and petrological studies of ELSC	Kilo Moana	2004	Sample	Rock core	Rock core	RC122	RC122	-19.9852	-176.105	East Lau Basin
KM0417	Hydrothermal and petrological studies of ELSC	Kilo Moana	2004	Sample	Rock core	Rock core	RC123	RC123	-19.977	-176.099	East Lau Basin
KM0417	Hydrothermal and petrological studies of ELSC	Kilo Moana	2004	Sample	Rock core	Rock core	RC124	RC124	-19.9572	-176.134	East Lau Basin
KM0417	Hydrothermal and petrological studies of ELSC	Kilo Moana	2004	Sample	Rock core	Rock core	RC125	RC125	-17.6564	-174.577	Fonualei
KM0417	Hydrothermal and petrological studies of ELSC	Kilo Moana	2004	Sample	Rock core	Rock core	RC126	RC126	-17.6878	-174.566	Fonualei
KM0417	Hydrothermal and petrological studies of ELSC	Kilo Moana	2004	Sample	Rock core	Rock core	RC127	RC127	-17.5833	-174.583	Fonualei
KM0417	Hydrothermal and petrological studies of ELSC	Kilo Moana	2004	Sample	Rock core	Rock core	RC128	RC128	-17.1866	-174.55	Fonualei
KM0417	Hydrothermal and petrological studies of ELSC	Kilo Moana	2004	Sample	Rock core	Rock core	RC129	RC129	-17.025	-174.502	Fonualei
KM0417	Hydrothermal and petrological studies of ELSC	Kilo Moana	2004	Sample	Rock core	Rock core	RC130	RC130	-16.9635	-174.537	Fonualei
KM0417	Hydrothermal and petrological studies of ELSC	Kilo Moana	2004	Sample	Rock core	Rock core	RC131	RC131	-16.8464	-174.529	Fonualei
KM0417	Hydrothermal and petrological studies of ELSC	Kilo Moana	2004	Sample	Rock core	Rock core	RC132	RC132	-16.7415	-174.52	Fonualei
KM0417	Hydrothermal and petrological studies of ELSC	Kilo Moana	2004	Sample	Rock core	Rock core	RC133	RC133	-16.6081	-174.509	Fonualei
KM0417	Hydrothermal and petrological studies of ELSC	Kilo Moana	2004	Sample	Rock core	Rock core	RC134	RC134	-16.358	-174.575	Fonualei
KM0417	Hydrothermal and petrological studies of ELSC	Kilo Moana	2004	Sample	Rock core	Rock core	RC135	RC135	-16.2662	-174.55	Fonualei
KM0417	Hydrothermal and petrological studies of ELSC	Kilo Moana	2004	Sample	Rock core	Rock core	RC136	RC136	-16.1334	-174.575	Fonualei
KM0417	Hydrothermal and petrological studies of ELSC	Kilo Moana	2004	Sample	Rock core	Rock core	RC137	RC137	-16.0531	-174.583	Fonualei
KM0417	Hydrothermal and petrological studies of ELSC	Kilo Moana	2004	Sample	Rock core	Rock core	RC138	RC138	-14.9639	-174.047	Northeast Lau
KM0417	Hydrothermal and petrological studies of ELSC	Kilo Moana	2004	Sample	Rock core	Rock core	RC139	RC139	-15.0006	-174.067	Northeast Lau
KM0417	Hydrothermal and petrological studies of ELSC	Kilo Moana	2004	Sample	Rock core	Rock core	RC140	RC140	-15.0531	-174.087	Northeast Lau
KM0417	Hydrothermal and petrological studies of ELSC	Kilo Moana	2004	Sample	Rock core	Rock core	RC141	RC141	-15.1086	-174.123	Northeast Lau
KM0417	Hydrothermal and petrological studies of ELSC	Kilo Moana	2004	Sample	Rock core	Rock core	RC142	RC142	-15.3672	-174.24	Northeast Lau
KM0417	Hydrothermal and petrological studies of ELSC	Kilo Moana	2004	Sample	Rock core	Rock core	RC143	RC143	-15.3928	-174.42	Northeast Lau
KM0417	Hydrothermal and petrological studies of ELSC	Kilo Moana	2004	Sample	Rock core	Rock core	RC144	RC144	-15.422	-174.287	Northeast Lau
KM0417	Hydrothermal and petrological studies of ELSC	Kilo Moana	2004	Sample	Rock core	Rock core	RC145	RC145	-15.4937	-174.349	Northeast Lau
KM0417	Hydrothermal and petrological studies of ELSC	Kilo Moana	2004	Observation	Towcam	Towcam	CT04	CT04-1	-22.1556	-176.6	East Lau Basin
KM0417	Hydrothermal and petrological studies of ELSC	Kilo Moana	2004	Observation	Towcam	Towcam	CT04	CT04-2	-22.1584	-176.601	East Lau Basin
KM0417	Hydrothermal and petrological studies of ELSC	Kilo Moana	2004	Observation	Towcam	Towcam	CT04	CT04-3	-22.1613	-176.602	East Lau Basin
KM0417	Hydrothermal and petrological studies of ELSC	Kilo Moana	2004	Observation	Towcam	Towcam	CT04	CT04-4	-22.1675	-176.604	East Lau Basin
KM0417	Hydrothermal and petrological studies of ELSC	Kilo Moana	2004	Observation	Towcam	Towcam	CT04	CT04-5	-22.1564	-176.599	East Lau Basin
KM0417	Hydrothermal and petrological studies of ELSC	Kilo Moana	2004	Observation	Towcam	Towcam	CT04	CT04-6	-22.1583	-176.598	East Lau Basin
KM0417	Hydrothermal and petrological studies of ELSC	Kilo Moana	2004	Observation	Towcam	Towcam	CT04	CT04-7	-22.1607	-176.599	East Lau Basin
KM0417	Hydrothermal and petrological studies of ELSC	Kilo Moana	2004	Observation	Towcam	Towcam	CT05	CT05-1	-22.1117	-176.605	East Lau Basin
KM0417	Hydrothermal and petrological studies of ELSC	Kilo Moana	2004	Observation	Towcam	Towcam	CT05	CT05-2	-22.1121	-176.608	East Lau Basin
KM0417	Hydrothermal and petrological studies of ELSC	Kilo Moana	2004	Observation	Towcam	Towcam	CT05	CT05-3	-22.1113	-176.607	East Lau Basin
KM0417	Hydrothermal and petrological studies of ELSC	Kilo Moana	2004	Observation	Towcam	Towcam	CT05	CT05-4	-22.1138	-176.608	East Lau Basin
KM0417	Hydrothermal and petrological studies of ELSC	Kilo Moana	2004	Observation	Towcam	Towcam	CT05	CT05-5	-22.1153	-176.608	East Lau Basin
KM0417	Hydrothermal and petrological studies of ELSC	Kilo Moana	2004	Observation	Towcam	Towcam	CT05	CT05-6	-22.1179	-176.609	East Lau Basin
KM0417	Hydrothermal and petrological studies of ELSC	Kilo Moana	2004	Observation	Towcam	Towcam	CT05	CT05-7	-22.12	-176.609	East Lau Basin
KM0417	Hydrothermal and petrological studies of ELSC	Kilo Moana	2004	Observation	Towcam	Towcam	CT05	CT05-8	-22.1223	-176.61	East Lau Basin
KM0417	Hydrothermal and petrological studies of ELSC	Kilo Moana	2004	Observation	Towcam	Towcam	CT08	CT08-1	-20.3681	-176.153	East Lau Basin
KM0417	Hydrothermal and petrological studies of ELSC	Kilo Moana	2004	Observation	Towcam	Towcam	CT08	CT08-2	-20.3724	-176.155	East Lau Basin
KM0417	Hydrothermal and petrological studies of ELSC	Kilo Moana	2004	Observation	Towcam	Towcam	CT08	CT08-3	-20.3772	-176.156	East Lau Basin
KM0417	Hydrothermal and petrological studies of ELSC	Kilo Moana	2004	Observation	Towcam	Towcam	CT08	CT08-4	-20.3818	-176.158	East Lau Basin
KM0417	Hydrothermal and petrological studies of ELSC	Kilo Moana	2004	Observation	Towcam	Towcam	CT08	CT08-5	-20.3856	-176.159	East Lau Basin
KM0417	Hydrothermal and petrological studies of ELSC	Kilo Moana	2004	Observation	Towcam	Towcam	CT08	CT08-6	-20.3912	-176.159	East Lau Basin
KM0417	Hydrothermal and petrological studies of ELSC	Kilo Moana	2004	Observation	Towcam	Towcam	CT08	CT08-7	-20.3956	-176.159	East Lau Basin
KM0417	Hydrothermal and petrological studies of ELSC	Kilo Moana	2004	Observation	Towcam	Towcam	CT08	CT08-8	-20.3976	-176.158	East Lau Basin
KM0417	Hydrothermal and petrological studies of ELSC	Kilo Moana	2004	Observation	Towcam	Towcam	CT03	CT03-1	-20.7476	-176.185	East Lau Basin
KM0417	Hydrothermal and petrological studies of ELSC	Kilo Moana	2004	Observation	Towcam	Towcam	CT03	CT03-2	-20.7559	-176.187	East Lau Basin
KM0417	Hydrothermal and petrological studies of ELSC	Kilo Moana	2004	Observation	Towcam	Towcam	CT03	CT03-3	-20.7618	-176.188	East Lau Basin
KM0417	Hydrothermal and petrological studies of ELSC	Kilo Moana	2004	Observation	Towcam	Towcam	CT03	CT03-4	-20.7735	-176.192	East Lau Basin
KM0417	Hydrothermal and petrological studies of ELSC	Kilo Moana	2004	Observation	Towcam	Towcam	CT03	CT03-5	-20.7781	-176.193	East Lau Basin
KM0417	Hydrothermal and petrological studies of ELSC	Kilo Moana	2004	Observation	Towcam	Towcam	CT03	CT03-6	-20.7808	-176.195	East Lau Basin
KM0417	Hydrothermal and petrological studies of ELSC	Kilo Moana	2004	Observation	Towcam	Towcam	CT03	CT03-7	-20.7828	-176.197	East Lau Basin
KM0417	Hydrothermal and petrological studies of ELSC	Kilo Moana	2004	Observation	Towcam	Towcam	CT03	CT03-8	-20.7841	-176.199	East Lau Basin
KM0417	Hydrothermal and petrological studies of ELSC	Kilo Moana	2004	Observation	Towcam	Towcam	CT09	CT09-1	-20.7693	-176.194	East Lau Basin
KM0417	Hydrothermal and petrological studies of ELSC	Kilo Moana	2004	Observation	Towcam	Towcam	CT09	CT09-2	-20.7658	-176.193	East Lau Basin
KM0417	Hydrothermal and petrological studies of ELSC	Kilo Moana	2004	Observation	Towcam	Towcam	CT09	CT09-3	-20.763	-176.194	East Lau Basin
KM0417	Hydrothermal and petrological studies of ELSC	Kilo Moana	2004	Observation	Towcam	Towcam	CT09	CT09-4	-20.7622	-176.193	East Lau Basin
KM0417	Hydrothermal and petrological studies of ELSC	Kilo Moana	2004	Observation	Towcam	Towcam	CT09	CT09-5	-20.7606	-176.192	East Lau Basin
KM0417	Hydrothermal and petrological studies of ELSC	Kilo Moana	2004	Observation	Towcam	Towcam	CT09	CT09-6	-20.7588	-176.191	East Lau Basin
KM0417	Hydrothermal and petrological studies of ELSC	Kilo Moana	2004	Observation	Towcam	Towcam	CT09	CT09-7	-20.7588	-176.191	East Lau Basin
KM0417	Hydrothermal and petrological studies of ELSC	Kilo Moana	2004	Observation	Towcam	Towcam	CT09	CT09-8	-20.7604	-176.191	East Lau Basin
KM0417	Hydrothermal and petrological studies of ELSC	Kilo Moana	2004	Observation	Towcam	Towcam	CT11	CT11-1	-20.7584	-176.189	East Lau Basin
KM0417	Hydrothermal and petrological studies of ELSC	Kilo Moana	2004	Observation	Towcam	Towcam	CT11	CT11-2	-20.7601	-176.191	East Lau Basin
KM0417	Hydrothermal and petrological studies of ELSC	Kilo Moana	2004	Observation	Towcam	Towcam	CT11	CT11-3	-20.7647	-176.192	East Lau Basin
KM0417	Hydrothermal and petrological studies of ELSC	Kilo Moana	2004	Observation	Towcam	Towcam	CT11	CT11-4	-20.7668	-176.192	East Lau Basin
KM0417	Hydrothermal and petrological studies of ELSC	Kilo Moana	2004	Observation	Towcam	Towcam	CT11	CT11-5	-20.7682	-176.193	East Lau Basin
KM0417	Hydrothermal and petrological studies of ELSC	Kilo Moana	2004	Observation	Towcam	Towcam	CT11	CT11-6	-20.7687	-176.193	East Lau Basin
KM0417	Hydrothermal and petrological studies of ELSC	Kilo Moana	2004	Observation	Towcam	Towcam	CT11	CT11-7	-20.7703	-176.195	East Lau Basin
KM0417	Hydrothermal and petrological studies of ELSC	Kilo Moana	2004	Observation	Towcam	Towcam	CT11	CT11-8	-20.772	-176.196	East Lau Basin
KM1008	Lau autonomous underwater hydrophone network	Kilo Moana	2010	Observation	Towcam	Towcam	CT08	CT08-1	-15.3767	-174.001	Northeast Lau
KM1008	Lau autonomous underwater hydrophone network	Kilo Moana	2010	Observation	Towcam	Towcam	CT08	CT08-2	-15.3767	-174.001	Northeast Lau
KM1008	Lau autonomous underwater hydrophone network	Kilo Moana	2010	Observation	Towcam	Towcam	CT08	CT08-3	-17.5437	-174.577	Fonualei
KM1008	Lau autonomous underwater hydrophone network	Kilo Moana	2010	Observation	Towcam	Towcam	CT08	CT08-4	-17.5435	-174.577	Fonualei
KM1008	Lau autonomous underwater hydrophone network	Kilo Moana	2010	Observation	Towcam	Towcam	CT08	CT08-5	-15.3763	-174.002	Northeast Lau
KM1008	Lau autonomous underwater hydrophone network	Kilo Moana	2010	Observation	Towcam	Towcam	CT08	CT08-6	-15.3759	-174.003	Northeast Lau
KM1008	Lau autonomous underwater hydrophone network	Kilo Moana	2010	Observation	Towcam	Towcam	CT08	CT08-7	-15.3757	-174.003	Northeast Lau
KM1008	Lau autonomous underwater hydrophone network	Kilo Moana	2010	Observation	Towcam	Towcam	CT07	CT07-1	-15.492	-174.738	Mangatolu
KM1008	Lau autonomous underwater hydrophone network	Kilo Moana	2010	Observation	Towcam	Towcam	CT09	CT09-1	-15.376	-174.002	Northeast Lau
KM1008	Lau autonomous underwater hydrophone network	Kilo Moana	2010	Observation	Towcam	Towcam	CT03	CT03-1	-15.862	-174.852	Mangatolu
KM1008	Lau autonomous underwater hydrophone network	Kilo Moana	2010	Observation	Towcam	Towcam	CT05	CT05-1	-15.613	-174.812	Mangatolu
KM1024	NE Lau Basin Rock Dredging Expedition	Kilo Moana	2010	Sample	Dredge	Dredge	D01	KM1024_D01	-15.3533	-174.23	Northeast Lau
KM1024	NE Lau Basin Rock Dredging Expedition	Kilo Moana	2010	Sample	Dredge	Dredge	D02	KM1024_D02	-15.3533	-174.229	Northeast Lau
KM1024	NE Lau Basin Rock Dredging Expedition	Kilo Moana	2010	Sample	Dredge	Dredge	D03	KM1024_D03	-15.2688	-174.031	Northeast Lau
KM1024	NE Lau Basin Rock Dredging Expedition	Kilo Moana	2010	Sample	Dredge	Dredge	D04	KM1024_D04	-15.1175	-173.999	Northeast Lau
KM1024	NE Lau Basin Rock Dredging Expedition	Kilo Moana	2010	Sample	Dredge	Dredge	D05	KM1024_D05	-15.0782	-173.956	Northeast Lau
KM1024	NE Lau Basin Rock Dredging Expedition	Kilo Moana	2010	Sample	Dredge	Dredge	D06	KM1024_D06	-15.1539	-173.914	Northeast Lau
KM1024	NE Lau Basin Rock Dredging Expedition	Kilo Moana	2010	Sample	Dredge	Dredge	D07	KM1024_D07	-15.1794	-173.887	Northeast Lau
KM1024	NE Lau Basin Rock Dredging Expedition	Kilo Moana	2010	Sample	Dredge	Dredge	D08	KM1024_D08	-15.1622	-173.86	Northeast Lau
KM1024	NE Lau Basin Rock Dredging Expedition	Kilo Moana	2010	Sample	Dredge	Dredge	D09	KM1024_D09	-15.2211	-173.884	Northeast Lau
KM1024	NE Lau Basin Rock Dredging Expedition	Kilo Moana	2010	Sample	Dredge	Dredge	D10	KM1024_D10	-15.2164	-173.809	Northeast Lau
KM1024	NE Lau Basin Rock Dredging Expedition	Kilo Moana	2010	Sample	Dredge	Dredge	D11	KM1024_D11	-15.1725	-173.8	Tonga Forearc
KM1024	NE Lau Basin Rock Dredging Expedition	Kilo Moana	2010	Sample	Dredge	Dredge	D12	KM1024_D12	-15.1083	-173.766	Tonga Forearc
KM1024	NE Lau Basin Rock Dredging Expedition	Kilo Moana	2010	Sample	Dredge	Dredge	D13	KM1024_D13	-15.0725	-173.697	Tonga Forearc
KM1024	NE Lau Basin Rock Dredging Expedition	Kilo Moana	2010	Sample	Dredge	Dredge	D14	KM1024_D14	-15.1139	-173.707	Tonga Forearc
KM1024	NE Lau Basin Rock Dredging Expedition	Kilo Moana	2010	Sample	Dredge	Dredge	D15	KM1024_D15	-15.1134	-173.747	Tonga Forearc
KM1024	NE Lau Basin Rock Dredging Expedition	Kilo Moana	2010	Sample	Dredge	Dredge	D16	KM1024_D16	-15.0404	-173.785	Tonga Forearc
KM1024	NE Lau Basin Rock Dredging Expedition	Kilo Moana	2010	Sample	Dredge	Dredge	D17	KM1024_D17	-15.0225	-173.786	Tonga Forearc
KM1024	NE Lau Basin Rock Dredging Expedition	Kilo Moana	2010	Sample	Dredge	Dredge	D18	KM1024_D18	-15.0184	-173.783	Tonga Forearc
KM1024	NE Lau Basin Rock Dredging Expedition	Kilo Moana	2010	Sample	Dredge	Dredge	D19	KM1024_D19	-15.0048	-173.717	Tonga Forearc
KM1024	NE Lau Basin Rock Dredging Expedition	Kilo Moana	2010	Sample	Dredge	Dredge	D20	KM1024_D20	-15.006	-173.795	Tonga Forearc
KM1024	NE Lau Basin Rock Dredging Expedition	Kilo Moana	2010	Sample	Dredge	Dredge	D21	KM1024_D21	-14.9932	-173.798	Tonga Forearc
KM1024	NE Lau Basin Rock Dredging Expedition	Kilo Moana	2010	Sample	Dredge	Dredge	D22	KM1024_D22	-14.9414	-173.801	Tonga Forearc
KM1024	NE Lau Basin Rock Dredging Expedition	Kilo Moana	2010	Sample	Dredge	Dredge	D23	KM1024_D23	-14.9096	-173.793	Tonga Forearc
KM1024	NE Lau Basin Rock Dredging Expedition	Kilo Moana	2010	Sample	Dredge	Dredge	D24	KM1024_D24	-14.8901	-173.942	Northeast Lau
KM1024	NE Lau Basin Rock Dredging Expedition	Kilo Moana	2010	Sample	Dredge	Dredge	D25	KM1024_D25	-14.9793	-173.994	Northeast Lau
KM1129A	Lau Basin Bottom Mapping	Kilo Moana	2011	Sample	Dredge	Dredge	D27	KM1129a-D27	-15.4715	-174.279	Northeast Lau
KM1129A	Lau Basin Bottom Mapping	Kilo Moana	2011	Sample	Dredge	Dredge	D28	KM1129a-D28	-15.3923	-174.127	Northeast Lau
KM1129A	Lau Basin Bottom Mapping	Kilo Moana	2011	Sample	Dredge	Dredge	D13	KM1129a-D13	-15.432	-174.04	Northeast Lau
KM1129A	Lau Basin Bottom Mapping	Kilo Moana	2011	Sample	Dredge	Dredge	D26	KM1129a-D26	-15.3774	-173.978	Northeast Lau
KM1129A	Lau Basin Bottom Mapping	Kilo Moana	2011	Sample	Dredge	Dredge	D15	KM1129a-D15	-15.2778	-174.011	Northeast Lau
KM1129A	Lau Basin Bottom Mapping	Kilo Moana	2011	Sample	Dredge	Dredge	D11	KM1129a-D11	-15.3996	-174.034	Northeast Lau
KM1129A	Lau Basin Bottom Mapping	Kilo Moana	2011	Sample	Dredge	Dredge	D12	KM1129a-D12	-15.398	-174.033	Northeast Lau
KM1129A	Lau Basin Bottom Mapping	Kilo Moana	2011	Sample	Dredge	Dredge	D14	KM1129a-D14	-15.3496	-173.981	Northeast Lau
KM1129A	Lau Basin Bottom Mapping	Kilo Moana	2011	Sample	Dredge	Dredge	D05	KM1129a-D05	-15.0831	-173.557	Tofua Arc
KM1129A	Lau Basin Bottom Mapping	Kilo Moana	2011	Sample	Dredge	Dredge	D06	KM1129a-D06	-15.1103	-173.575	Tofua Arc
KM1129A	Lau Basin Bottom Mapping	Kilo Moana	2011	Sample	Dredge	Dredge	D04	KM1129a-D04	-15.155	-173.595	Tofua Arc
KM1129A	Lau Basin Bottom Mapping	Kilo Moana	2011	Sample	Dredge	Dredge	D23	KM1129a-D23	-15.1793	-174.213	Northeast Lau
KM1129A	Lau Basin Bottom Mapping	Kilo Moana	2011	Sample	Dredge	Dredge	D24	KM1129a-D24	-15.1672	-174.192	Northeast Lau
KM1129A	Lau Basin Bottom Mapping	Kilo Moana	2011	Sample	Dredge	Dredge	D25	KM1129a-D25	-15.4084	-174.687	Mangatolu
KM1129A	Lau Basin Bottom Mapping	Kilo Moana	2011	Sample	Dredge	Dredge	D10	KM1129a-D10	-15.0189	-173.791	Tonga Forearc
KM1129A	Lau Basin Bottom Mapping	Kilo Moana	2011	Sample	Dredge	Dredge	D07	KM1129a-D07	-15.011	-173.785	Tonga Forearc
KM1129A	Lau Basin Bottom Mapping	Kilo Moana	2011	Sample	Dredge	Dredge	D08	KM1129a-D08	-15.0029	-173.797	Tonga Forearc
KM1129A	Lau Basin Bottom Mapping	Kilo Moana	2011	Sample	Dredge	Dredge	D09	KM1129a-D09	-15.0075	-173.807	Tonga Forearc
KM1129A	Lau Basin Bottom Mapping	Kilo Moana	2011	Sample	Dredge	Dredge	D21	KM1129a-D21	-16.0921	-174.58	Fonualei
KM1129A	Lau Basin Bottom Mapping	Kilo Moana	2011	Sample	Dredge	Dredge	D22	KM1129a-D22	-16.3105	-174.555	Fonualei
KM1129A	Lau Basin Bottom Mapping	Kilo Moana	2011	Sample	Dredge	Dredge	D16	KM1129a-D16	-16.6974	-174.525	Fonualei
KM1129A	Lau Basin Bottom Mapping	Kilo Moana	2011	Sample	Dredge	Dredge	D17	KM1129a-D17	-16.647	-174.545	Fonualei
KM1129A	Lau Basin Bottom Mapping	Kilo Moana	2011	Sample	Dredge	Dredge	D18	KM1129a-D18	-16.646	-174.526	Fonualei
KM1129A	Lau Basin Bottom Mapping	Kilo Moana	2011	Sample	Dredge	Dredge	D19	KM1129a-D19	-16.6381	-174.516	Fonualei
KM1129A	Lau Basin Bottom Mapping	Kilo Moana	2011	Sample	Dredge	Dredge	D20	KM1129a-D20	-16.9721	-174.543	Fonualei
KM1129A	Lau Basin Bottom Mapping	Kilo Moana	2011	Sample	Dredge	Dredge	D01	KM1129a-D01	-15.0857	-173.632	Tonga Forearc
KM1129A	Lau Basin Bottom Mapping	Kilo Moana	2011	Sample	Dredge	Dredge	D02	KM1129a-D02	-15.1026	-173.381	Tonga Forearc
KM1129A	Lau Basin Bottom Mapping	Kilo Moana	2011	Sample	Dredge	Dredge	D03	KM1129a-D03	-15.1023	-173.673	Tonga Forearc
KODOS H06	KODOS H06	Onnuri	2006	Sample	Dredge	Dredge	DG26	H06DG26	-15.395	-174.124	Northeast Lau
KODOS H06	KODOS H06	Onnuri	2006	Sample	Dredge	Dredge	DG22	H06DG22	-15.3633	-173.932	Northeast Lau
KODOS H06	KODOS H06	Onnuri	2006	Sample	Dredge	Dredge	DG23	H06DG23	-15.3751	-173.952	Northeast Lau
KODOS H06	KODOS H06	Onnuri	2006	Sample	Dredge	Dredge	DG24	H06DG24	-15.3933	-174.055	Northeast Lau
KODOS H06	KODOS H06	Onnuri	2006	Sample	Dredge	Dredge	DG17	H06DG17	-15.4002	-174.006	Northeast Lau
KODOS H06	KODOS H06	Onnuri	2006	Sample	Dredge	Dredge	DG16	H06DG16	-15.4219	-174.012	Northeast Lau
KODOS H06	KODOS H06	Onnuri	2006	Sample	Dredge	Dredge	DG12	H06DG12	-15.4195	-174.284	Northeast Lau
KODOS H06	KODOS H06	Onnuri	2006	Sample	Dredge	Dredge	DG18	H06DG18	-15.3712	-173.997	Northeast Lau
KODOS H06	KODOS H06	Onnuri	2006	Sample	Dredge	Dredge	DG20	H06DG20	-15.3333	-173.995	Northeast Lau
KODOS H06	KODOS H06	Onnuri	2006	Sample	Dredge	Dredge	DG04	H06DG04	-16.6598	-174.527	Fonualei
MGLN07MV	MAGELLAN Leg 7	Melville	2006	Observation	ROV observation	ROV Jason II	J2-232	J2-232	-21.9894	-176.568	East Lau Basin
MGLN07MV	MAGELLAN Leg 7	Melville	2006	Observation	ROV observation	ROV Jason II	J2-239	J2-239	-21.988	-176.568	East Lau Basin
MGLN07MV	MAGELLAN Leg 7	Melville	2006	Observation	ROV observation	ROV Jason II	J2-238	J2-238	-22.1815	-176.602	East Lau Basin
MGLN07MV	MAGELLAN Leg 7	Melville	2006	Observation	ROV observation	ROV Jason II	J2-233	J2-233	-20.3161	-176.136	East Lau Basin
MGLN07MV	MAGELLAN Leg 7	Melville	2006	Observation	ROV observation	ROV Jason II	J2-240	J2-240	-20.3164	-176.137	East Lau Basin
MGLN07MV	MAGELLAN Leg 7	Melville	2006	Observation	ROV observation	ROV Jason II	J2-230	J2-230	-20.053	-176.134	East Lau Basin
MGLN07MV	MAGELLAN Leg 7	Melville	2006	Observation	ROV observation	ROV Jason II	J2-235	J2-235	-20.054	-176.133	East Lau Basin
MGLN07MV	MAGELLAN Leg 7	Melville	2006	Observation	ROV observation	ROV Jason II	J2-231	J2-231	-20.761	-176.191	East Lau Basin
MGLN07MV	MAGELLAN Leg 7	Melville	2006	Observation	ROV observation	ROV Jason II	J2-234	J2-234	-20.7665	-176.192	East Lau Basin
MGLN07MV	MAGELLAN Leg 7	Melville	2006	Observation	ROV observation	ROV Jason II	J2-236	J2-236	-20.7628	-176.192	East Lau Basin
MGLN07MV	MAGELLAN Leg 7	Melville	2006	Observation	ROV observation	ROV Jason II	J2-237	J2-237	-20.7611	-176.191	East Lau Basin
MGLN08MV	MAGELLAN Leg 8	Melville	2006	Sample	Dredge	Dredge	D5	MGLN08MV-005D	-16.0323	-177.158	Zephyr
MGLN08MV	MAGELLAN Leg 8	Melville	2006	Sample	Dredge	Dredge	D6	MGLN08MV-006D	-15.975	-177.233	NW Lau
MGLN08MV	MAGELLAN Leg 8	Melville	2006	Sample	Dredge	Dredge	D7	MGLN08MV-007D	-15.2165	-176.265	Rochambeau
MGLN08MV	MAGELLAN Leg 8	Melville	2006	Sample	Dredge	Dredge	D8	MGLN08MV-008D	-15.4363	-176.27	Rochambeau
MGLN08MV	MAGELLAN Leg 8	Melville	2006	Sample	Dredge	Dredge	D9	MGLN08MV-009D	-15.2328	-176.584	Southeast Futuna
MGLN08MV	MAGELLAN Leg 8	Melville	2006	Sample	Dredge	Dredge	D10	MGLN08MV-010D	-15.159	-176.449	Rochambeau
MGLN08MV	MAGELLAN Leg 8	Melville	2006	Sample	Dredge	Dredge	D11	MGLN08MV-011D	-14.9365	-176.785	Southeast Futuna
MGLN08MV	MAGELLAN Leg 8	Melville	2006	Sample	Dredge	Dredge	D12	MGLN08MV-012D	-14.8235	-176.792	Southeast Futuna
MGLN08MV	MAGELLAN Leg 8	Melville	2006	Sample	Dredge	Dredge	D13	MGLN08MV-013D	-14.8363	-176.535	Southeast Futuna
MGLN08MV	MAGELLAN Leg 8	Melville	2006	Sample	Dredge	Dredge	D14	MGLN08MV-014D	-15.035	-175.986	Rochambeau
MGLN08MV	MAGELLAN Leg 8	Melville	2006	Sample	Dredge	Dredge	D15	MGLN08MV-015D	-14.8585	-175.906	Rochambeau
MGLN08MV	MAGELLAN Leg 8	Melville	2006	Sample	Dredge	Dredge	D16	MGLN08MV-016D	-14.8633	-175.573	North Fonualei
MGLN08MV	MAGELLAN Leg 8	Melville	2006	Sample	Dredge	Dredge	D17	MGLN08MV-017D	-14.4833	-176.017	North Lau Forearc
N84-TNG	Natsushima 84	Natsushima	1984	Sample	Dredge	Dredge	D1 (ST15)	N84-TNG D1	-17.6267	-172.673	Tonga Forearc
N84-TNG	Natsushima 84	Natsushima	1984	Sample	Dredge	Dredge	D8	N84-TNG D8	-15.9033	-172.757	Tonga Forearc
N84-TNG	Natsushima 84	Natsushima	1984	Sample	Dredge	Dredge	D9	N84-TNG D9	-15.8817	-173.162	Tofua Arc
N84-TNG	Natsushima 84	Natsushima	1984	Sample	Dredge	Dredge	St-31	N84-TNG St-31	-17.3533	-176.778	Central Lau Basin
N84-TNG	Natsushima 84	Natsushima	1984	Sample	Dredge	Dredge	D5 (ST23)	N84-TNG D5	-15.3267	-173.397	Tofua Arc
N84-TNG	Natsushima 84	Natsushima	1984	Sample	Dredge	Dredge	D6 (ST24)	N84-TNG D6	-14.8917	-173.73	Tonga Forearc
N84-TNG	Natsushima 84	Natsushima	1984	Sample	Dredge	Dredge	D7 (ST25)	N84-TNG D7	-14.9933	-173.76	Tonga Forearc
N84-TNG	Natsushima 84	Natsushima	1984	Sample	Dredge	Dredge	D3 (ST21)	N84-TNG D3	-14.9663	-173.39	Tonga Forearc
N84-TNG	Natsushima 84	Natsushima	1984	Sample	Dredge	Dredge	D4 (ST22)	N84-TNG D4	-14.8133	-173.382	Tonga Forearc
NAUTILAU	NAUTILAU	Le Nadir	1989	Observation	Manned submersible	Nautile Dive	Dive-368-1	Dive-368-1	-21.4563	-176.366	East Lau Basin
NAUTILAU	NAUTILAU	Le Nadir	1989	Observation	Manned submersible	Nautile Dive	Dive-369-2	Dive-369-2	-21.4658	-176.324	East Lau Basin
NAUTILAU	NAUTILAU	Le Nadir	1989	Observation	Manned submersible	Nautile Dive	Dive-370-3	Dive-370-3	-21.4453	-176.311	East Lau Basin
NAUTILAU	NAUTILAU	Le Nadir	1989	Observation	Manned submersible	Nautile Dive	Dive-371-4	Dive-371-4	-21.4783	-176.285	East Lau Basin
NAUTILAU	NAUTILAU	Le Nadir	1989	Observation	Manned submersible	Nautile Dive	Dive-372-5	Dive-372-5	0	0	East Lau Basin
NAUTILAU	NAUTILAU	Le Nadir	1989	Observation	Manned submersible	Nautile Dive	Dive-373-6	Dive-373-6	-21.8512	-176.496	East Lau Basin
NAUTILAU	NAUTILAU	Le Nadir	1989	Observation	Manned submersible	Nautile Dive	Dive-374-7	Dive-374-7	-21.8717	-176.511	East Lau Basin
NAUTILAU	NAUTILAU	Le Nadir	1989	Observation	Manned submersible	Nautile Dive	Dive-375-8	Dive-375-8	-21.9338	-176.545	East Lau Basin
NAUTILAU	NAUTILAU	Le Nadir	1989	Observation	Manned submersible	Nautile Dive	Dive-376-9	Dive-376-9	-21.9367	-176.553	East Lau Basin
NAUTILAU	NAUTILAU	Le Nadir	1989	Observation	Manned submersible	Nautile Dive	Dive-377-10	Dive-377-10	-21.8535	-176.495	East Lau Basin
NAUTILAU	NAUTILAU	Le Nadir	1989	Observation	Manned submersible	Nautile Dive	Dive-378-11	Dive-378-11	-21.5317	-176.71	West Lau Basin
NAUTILAU	NAUTILAU	Le Nadir	1989	Observation	Manned submersible	Nautile Dive	Dive-379-12	Dive-379-12	-22.5353	-176.717	East Lau Basin
NAUTILAU	NAUTILAU	Le Nadir	1989	Observation	Manned submersible	Nautile Dive	Dive-380-13	Dive-380-13	-22.5925	-176.732	East Lau Basin
NAUTILAU	NAUTILAU	Le Nadir	1989	Observation	Manned submersible	Nautile Dive	Dive-381-14	Dive-381-14	-22.5325	-176.718	East Lau Basin
NAUTILAU	NAUTILAU	Le Nadir	1989	Observation	Manned submersible	Nautile Dive	Dive-382-15	Dive-382-15	-22.5608	-176.692	East Lau Basin
NAUTILAU	NAUTILAU	Le Nadir	1989	Observation	Manned submersible	Nautile Dive	Dive-383-16	Dive-383-16	-22.5357	-176.716	East Lau Basin
NAUTILAU	NAUTILAU	Le Nadir	1989	Observation	Manned submersible	Nautile Dive	Dive-384-17	Dive-384-17	-22.306	-176.59	East Lau Basin
NAUTILAU	NAUTILAU	Le Nadir	1989	Observation	Manned submersible	Nautile Dive	Dive-385-18	Dive-385-18	-22.2363	-176.607	East Lau Basin
NAUTILAU	NAUTILAU	Le Nadir	1989	Observation	Manned submersible	Nautile Dive	Dive-386-19	Dive-386-19	-22.1795	-176.609	East Lau Basin
NAUTILAU	NAUTILAU	Le Nadir	1989	Observation	Manned submersible	Nautile Dive	Dive-387-20	Dive-387-20	-22.2167	-176.609	East Lau Basin
NAUTILAU	NAUTILAU	Le Nadir	1989	Observation	Manned submersible	Nautile Dive	Dive-388-21	Dive-388-21	-22.222	-176.62	East Lau Basin
NAUTILAU	NAUTILAU	Le Nadir	1989	Observation	Manned submersible	Nautile Dive	Dive-389-22	Dive-389-22	-22.2155	-176.61	East Lau Basin
NAUTILAU	NAUTILAU	Le Nadir	1989	Sample	ROV sample	ROV grab	Dive-368-1	NL-PL-01-01	-21.4563	-176.366	East Lau Basin
NAUTILAU	NAUTILAU	Le Nadir	1989	Sample	ROV sample	ROV grab	Dive-368-1	NL-PL-01-02	-21.4565	-176.371	East Lau Basin
NAUTILAU	NAUTILAU	Le Nadir	1989	Sample	ROV sample	ROV grab	Dive-368-1	NL-PL-01-03	-21.4572	-176.375	East Lau Basin
NAUTILAU	NAUTILAU	Le Nadir	1989	Sample	ROV sample	ROV grab	Dive-368-1	NL-PL-01-04	-21.4647	-176.378	East Lau Basin
NAUTILAU	NAUTILAU	Le Nadir	1989	Sample	ROV sample	ROV grab	Dive-369-2	NL-PL-02-01	-21.4658	-176.324	East Lau Basin
NAUTILAU	NAUTILAU	Le Nadir	1989	Sample	ROV sample	ROV grab	Dive-369-2	NL-PL-02-02	-21.4664	-176.333	East Lau Basin
NAUTILAU	NAUTILAU	Le Nadir	1989	Sample	ROV sample	ROV grab	Dive-369-2	NL-PL-02-03	-21.462	-176.329	East Lau Basin
NAUTILAU	NAUTILAU	Le Nadir	1989	Sample	ROV sample	ROV grab	Dive-369-2	NL-PL-02-04	-21.4597	-176.323	East Lau Basin
NAUTILAU	NAUTILAU	Le Nadir	1989	Sample	ROV sample	ROV grab	Dive-370-3	NL-PL-03-01	-21.4453	-176.311	East Lau Basin
NAUTILAU	NAUTILAU	Le Nadir	1989	Sample	ROV sample	ROV grab	Dive-370-3	NL-PL-03-02	-21.4417	-176.283	East Lau Basin
NAUTILAU	NAUTILAU	Le Nadir	1989	Sample	ROV sample	ROV grab	Dive-371-4	NL-PL-04-01	-21.4783	-176.285	East Lau Basin
NAUTILAU	NAUTILAU	Le Nadir	1989	Sample	ROV sample	ROV grab	Dive-371-4	NL-PL-04-02	-21.4783	-176.287	East Lau Basin
NAUTILAU	NAUTILAU	Le Nadir	1989	Sample	ROV sample	ROV grab	Dive-371-4	NL-PL-04-03	-21.4783	-176.287	East Lau Basin
NAUTILAU	NAUTILAU	Le Nadir	1989	Sample	ROV sample	ROV grab	Dive-371-4	NL-PL-04-04	-21.4783	-176.287	East Lau Basin
NAUTILAU	NAUTILAU	Le Nadir	1989	Sample	ROV sample	ROV grab	Dive-371-4	NL-PL-04-05	-21.4783	-176.287	East Lau Basin
NAUTILAU	NAUTILAU	Le Nadir	1989	Sample	ROV sample	ROV grab	Dive-371-4	NL-PL-04-06	-21.4783	-176.287	East Lau Basin
NAUTILAU	NAUTILAU	Le Nadir	1989	Sample	ROV sample	ROV grab	Dive-371-4	NL-PL-04-07	-21.4783	-176.287	East Lau Basin
NAUTILAU	NAUTILAU	Le Nadir	1989	Sample	ROV sample	ROV grab	Dive-371-4	NL-PL-04-08	-21.47	-176.305	East Lau Basin
NAUTILAU	NAUTILAU	Le Nadir	1989	Sample	ROV sample	ROV grab	Dive-371-4	NL-PL-04-09	-21.47	-176.305	East Lau Basin
NAUTILAU	NAUTILAU	Le Nadir	1989	Sample	ROV sample	ROV grab	Dive-371-4	NL-PL-04-10	-21.475	-176.303	East Lau Basin
NAUTILAU	NAUTILAU	Le Nadir	1989	Sample	ROV sample	ROV grab	Dive-371-4	NL-PL-04-11	-21.4767	-176.3	East Lau Basin
NAUTILAU	NAUTILAU	Le Nadir	1989	Sample	ROV sample	ROV grab	Dive-371-4	NL-PL-04-12	-21.4783	-176.287	East Lau Basin
NAUTILAU	NAUTILAU	Le Nadir	1989	Sample	ROV sample	ROV grab	Dive-371-4	NL-PL-04-13	-21.47	-176.305	East Lau Basin
NAUTILAU	NAUTILAU	Le Nadir	1989	Sample	ROV sample	ROV grab	Dive-373-6	NL-PL-06-01	-21.8502	-176.496	East Lau Basin
NAUTILAU	NAUTILAU	Le Nadir	1989	Sample	ROV sample	ROV grab	Dive-373-6	NL-PL-06-02	-21.8502	-176.496	East Lau Basin
NAUTILAU	NAUTILAU	Le Nadir	1989	Sample	ROV sample	ROV grab	Dive-373-6	NL-PL-06-03	-21.8502	-176.512	East Lau Basin
NAUTILAU	NAUTILAU	Le Nadir	1989	Sample	ROV sample	ROV grab	Dive-373-6	NL-PL-06-04	-21.8642	-176.512	East Lau Basin
NAUTILAU	NAUTILAU	Le Nadir	1989	Sample	ROV sample	ROV grab	Dive-374-7	NL-PL-07-01	-21.8717	-176.511	East Lau Basin
NAUTILAU	NAUTILAU	Le Nadir	1989	Sample	ROV sample	ROV grab	Dive-374-7	NL-PL-07-02	-21.877	-176.514	East Lau Basin
NAUTILAU	NAUTILAU	Le Nadir	1989	Sample	ROV sample	ROV grab	Dive-374-7	NL-PL-07-03	-21.8818	-176.517	East Lau Basin
NAUTILAU	NAUTILAU	Le Nadir	1989	Sample	ROV sample	ROV grab	Dive-374-7	NL-PL-07-04	-21.8822	-176.517	East Lau Basin
NAUTILAU	NAUTILAU	Le Nadir	1989	Sample	ROV sample	ROV grab	Dive-374-7	NL-PL-07-05	-21.8838	-176.52	East Lau Basin
NAUTILAU	NAUTILAU	Le Nadir	1989	Sample	ROV sample	ROV grab	Dive-374-7	NL-PL-07-06	-21.8853	-176.52	East Lau Basin
NAUTILAU	NAUTILAU	Le Nadir	1989	Sample	ROV sample	ROV grab	Dive-374-7	NL-PL-07-07	-21.8853	-176.52	East Lau Basin
NAUTILAU	NAUTILAU	Le Nadir	1989	Sample	ROV sample	ROV grab	Dive-374-7	NL-PL-07-08	-21.8852	-176.52	East Lau Basin
NAUTILAU	NAUTILAU	Le Nadir	1989	Sample	ROV sample	ROV grab	Dive-375-8	NL-PL-08-01	-21.9338	-176.545	East Lau Basin
NAUTILAU	NAUTILAU	Le Nadir	1989	Sample	ROV sample	ROV grab	Dive-375-8	NL-PL-08-02	-21.9383	-176.543	East Lau Basin
NAUTILAU	NAUTILAU	Le Nadir	1989	Sample	ROV sample	ROV grab	Dive-375-8	NL-PL-08-03	-21.9453	-176.546	East Lau Basin
NAUTILAU	NAUTILAU	Le Nadir	1989	Sample	ROV sample	ROV grab	Dive-375-8	NL-PL-08-04	-21.9455	-176.545	East Lau Basin
NAUTILAU	NAUTILAU	Le Nadir	1989	Sample	ROV sample	ROV grab	Dive-375-8	NL-PL-08-05	-21.9462	-176.54	East Lau Basin
NAUTILAU	NAUTILAU	Le Nadir	1989	Sample	ROV sample	ROV grab	Dive-375-8	NL-PL-08-06	-21.9475	-176.543	East Lau Basin
NAUTILAU	NAUTILAU	Le Nadir	1989	Sample	ROV sample	ROV grab	Dive-375-8	NL-PL-08-07	-21.9475	-176.543	East Lau Basin
NAUTILAU	NAUTILAU	Le Nadir	1989	Sample	ROV sample	ROV grab	Dive-376-9	NL-PL-09-01	-21.9367	-176.553	East Lau Basin
NAUTILAU	NAUTILAU	Le Nadir	1989	Sample	ROV sample	ROV grab	Dive-376-9	NL-PL-09-02	-21.9372	-176.55	East Lau Basin
NAUTILAU	NAUTILAU	Le Nadir	1989	Sample	ROV sample	ROV grab	Dive-376-9	NL-PL-09-03	-21.9417	-176.54	East Lau Basin
NAUTILAU	NAUTILAU	Le Nadir	1989	Sample	ROV sample	ROV grab	Dive-376-9	NL-PL-09-04	-21.9403	-176.543	East Lau Basin
NAUTILAU	NAUTILAU	Le Nadir	1989	Sample	ROV sample	ROV grab	Dive-376-9	NL-PL-09-05	-21.9392	-176.547	East Lau Basin
NAUTILAU	NAUTILAU	Le Nadir	1989	Sample	ROV sample	ROV grab	Dive-376-9	NL-PL-09-06	-21.9497	-176.665	East Lau Basin
NAUTILAU	NAUTILAU	Le Nadir	1989	Sample	ROV sample	ROV grab	Dive-376-9	NL-PL-09-07	-21.9497	-176.665	East Lau Basin
NAUTILAU	NAUTILAU	Le Nadir	1989	Sample	ROV sample	ROV grab	Dive-377-10	NL-PL-10-01	-21.8535	-176.495	East Lau Basin
NAUTILAU	NAUTILAU	Le Nadir	1989	Sample	ROV sample	ROV grab	Dive-377-10	NL-PL-10-02	-21.8535	-176.495	East Lau Basin
NAUTILAU	NAUTILAU	Le Nadir	1989	Sample	ROV sample	ROV grab	Dive-377-10	NL-PL-10-03	-21.8535	-176.495	East Lau Basin
NAUTILAU	NAUTILAU	Le Nadir	1989	Sample	ROV sample	ROV grab	Dive-377-10	NL-PL-10-04	-21.8535	-176.495	East Lau Basin
NAUTILAU	NAUTILAU	Le Nadir	1989	Sample	ROV sample	ROV grab	Dive-377-10	NL-PL-10-05	-21.8535	-176.495	East Lau Basin
NAUTILAU	NAUTILAU	Le Nadir	1989	Sample	ROV sample	ROV grab	Dive-377-10	NL-PL-10-06	-21.8535	-176.495	East Lau Basin
NAUTILAU	NAUTILAU	Le Nadir	1989	Sample	ROV sample	ROV grab	Dive-377-10	NL-PL-10-07	-21.8535	-176.495	East Lau Basin
NAUTILAU	NAUTILAU	Le Nadir	1989	Sample	ROV sample	ROV grab	Dive-377-10	NL-PL-10-08	-21.8512	-176.493	East Lau Basin
NAUTILAU	NAUTILAU	Le Nadir	1989	Sample	ROV sample	ROV grab	Dive-377-10	NL-PL-10-09	-21.8517	-176.496	East Lau Basin
NAUTILAU	NAUTILAU	Le Nadir	1989	Sample	ROV sample	ROV grab	Dive-377-10	NL-PL-10-10	-21.8543	-176.497	East Lau Basin
NAUTILAU	NAUTILAU	Le Nadir	1989	Sample	ROV sample	ROV grab	Dive-378-11	NL-PL-11-01A	-22.5317	-176.71	East Lau Basin
NAUTILAU	NAUTILAU	Le Nadir	1989	Sample	ROV sample	ROV grab	Dive-378-11	NL-PL-11-01B	-22.5318	-176.71	East Lau Basin
NAUTILAU	NAUTILAU	Le Nadir	1989	Sample	ROV sample	ROV grab	Dive-378-11	NL-PL-11-02A	-22.5317	-176.715	East Lau Basin
NAUTILAU	NAUTILAU	Le Nadir	1989	Sample	ROV sample	ROV grab	Dive-378-11	NL-PL-11-02B	-22.5317	-176.715	East Lau Basin
NAUTILAU	NAUTILAU	Le Nadir	1989	Sample	ROV sample	ROV grab	Dive-378-11	NL-PL-11-03	-22.5333	-176.717	East Lau Basin
NAUTILAU	NAUTILAU	Le Nadir	1989	Sample	ROV sample	ROV grab	Dive-378-11	NL-PL-11-04	-22.5335	-176.717	East Lau Basin
NAUTILAU	NAUTILAU	Le Nadir	1989	Sample	ROV sample	ROV grab	Dive-378-11	NL-PL-11-05	-22.5333	-176.718	East Lau Basin
NAUTILAU	NAUTILAU	Le Nadir	1989	Sample	ROV sample	ROV grab	Dive-378-11	NL-PL-11-06	-22.5342	-176.719	East Lau Basin
NAUTILAU	NAUTILAU	Le Nadir	1989	Sample	ROV sample	ROV grab	Dive-379-12	NL-PL-12-01	-22.5353	-176.717	East Lau Basin
NAUTILAU	NAUTILAU	Le Nadir	1989	Sample	ROV sample	ROV grab	Dive-379-12	NL-PL-12-02	-22.5458	-176.717	East Lau Basin
NAUTILAU	NAUTILAU	Le Nadir	1989	Sample	ROV sample	ROV grab	Dive-379-12	NL-PL-12-03	-22.547	-176.717	East Lau Basin
NAUTILAU	NAUTILAU	Le Nadir	1989	Sample	ROV sample	ROV grab	Dive-379-12	NL-PL-12-04	-22.548	-176.717	East Lau Basin
NAUTILAU	NAUTILAU	Le Nadir	1989	Sample	ROV sample	ROV grab	Dive-379-12	NL-PL-12-05	-22.5583	-176.717	East Lau Basin
NAUTILAU	NAUTILAU	Le Nadir	1989	Sample	ROV sample	ROV grab	Dive-380-13	NL-PL-13-01	-22.5925	-176.732	East Lau Basin
NAUTILAU	NAUTILAU	Le Nadir	1989	Sample	ROV sample	ROV grab	Dive-380-13	NL-PL-13-02	-22.5952	-176.733	East Lau Basin
NAUTILAU	NAUTILAU	Le Nadir	1989	Sample	ROV sample	ROV grab	Dive-380-13	NL-PL-13-03	-22.6107	-176.737	East Lau Basin
NAUTILAU	NAUTILAU	Le Nadir	1989	Sample	ROV sample	ROV grab	Dive-380-13	NL-PL-13-04	-22.6233	-176.742	East Lau Basin
NAUTILAU	NAUTILAU	Le Nadir	1989	Sample	ROV sample	ROV grab	Dive-381-14	NL-PL-14-01	-22.5325	-176.718	East Lau Basin
NAUTILAU	NAUTILAU	Le Nadir	1989	Sample	ROV sample	ROV grab	Dive-381-14	NL-PL-14-02	-22.5325	-176.718	East Lau Basin
NAUTILAU	NAUTILAU	Le Nadir	1989	Sample	ROV sample	ROV grab	Dive-381-14	NL-PL-14-03	-22.5325	-176.718	East Lau Basin
NAUTILAU	NAUTILAU	Le Nadir	1989	Sample	ROV sample	ROV grab	Dive-381-14	NL-PL-14-04	-22.5325	-176.718	East Lau Basin
NAUTILAU	NAUTILAU	Le Nadir	1989	Sample	ROV sample	ROV grab	Dive-382-15	NL-PL-15-01	-22.5608	-176.692	East Lau Basin
NAUTILAU	NAUTILAU	Le Nadir	1989	Sample	ROV sample	ROV grab	Dive-383-16	NL-PL-16-01	-22.5357	-176.716	East Lau Basin
NAUTILAU	NAUTILAU	Le Nadir	1989	Sample	ROV sample	ROV grab	Dive-383-16	NL-PL-16-02	-22.5357	-176.716	East Lau Basin
NAUTILAU	NAUTILAU	Le Nadir	1989	Sample	ROV sample	ROV grab	Dive-383-16	NL-PL-16-03	-22.5357	-176.716	East Lau Basin
NAUTILAU	NAUTILAU	Le Nadir	1989	Sample	ROV sample	ROV grab	Dive-383-16	NL-PL-16-04	-22.5357	-176.716	East Lau Basin
NAUTILAU	NAUTILAU	Le Nadir	1989	Sample	ROV sample	ROV grab	Dive-383-16	NL-PL-16-05	-22.5357	-176.716	East Lau Basin
NAUTILAU	NAUTILAU	Le Nadir	1989	Sample	ROV sample	ROV grab	Dive-383-16	NL-PL-16-06	-22.5357	-176.716	East Lau Basin
NAUTILAU	NAUTILAU	Le Nadir	1989	Sample	ROV sample	ROV grab	Dive-383-16	NL-PL-16-07	-22.5325	-176.719	East Lau Basin
NAUTILAU	NAUTILAU	Le Nadir	1989	Sample	ROV sample	ROV grab	Dive-383-16	NL-PL-16-08	-22.5325	-176.719	East Lau Basin
NAUTILAU	NAUTILAU	Le Nadir	1989	Sample	ROV sample	ROV grab	Dive-383-16	NL-PL-16-09	-22.5325	-176.719	East Lau Basin
NAUTILAU	NAUTILAU	Le Nadir	1989	Sample	ROV sample	ROV grab	Dive-383-16	NL-PL-16-10	-22.5325	-176.719	East Lau Basin
NAUTILAU	NAUTILAU	Le Nadir	1989	Sample	ROV sample	ROV grab	Dive-383-16	NL-PL-16-11	-22.5325	-176.719	East Lau Basin
NAUTILAU	NAUTILAU	Le Nadir	1989	Sample	ROV sample	ROV grab	Dive-383-16	NL-PL-16-12	-22.5325	-176.719	East Lau Basin
NAUTILAU	NAUTILAU	Le Nadir	1989	Sample	ROV sample	ROV grab	Dive-383-16	NL-PL-16-13	-22.5325	-176.719	East Lau Basin
NAUTILAU	NAUTILAU	Le Nadir	1989	Sample	ROV sample	ROV grab	Dive-384-17	NL-PL-17-01	-22.306	-176.59	East Lau Basin
NAUTILAU	NAUTILAU	Le Nadir	1989	Sample	ROV sample	ROV grab	Dive-384-17	NL-PL-17-02	-22.3052	-176.587	East Lau Basin
NAUTILAU	NAUTILAU	Le Nadir	1989	Sample	ROV sample	ROV grab	Dive-384-17	NL-PL-17-03	-22.3043	-176.587	East Lau Basin
NAUTILAU	NAUTILAU	Le Nadir	1989	Sample	ROV sample	ROV grab	Dive-384-17	NL-PL-17-04	-22.2998	-176.581	East Lau Basin
NAUTILAU	NAUTILAU	Le Nadir	1989	Sample	ROV sample	ROV grab	Dive-384-17	NL-PL-17-05	-22.2973	-176.579	East Lau Basin
NAUTILAU	NAUTILAU	Le Nadir	1989	Sample	ROV sample	ROV grab	Dive-384-17	NL-PL-17-06	-22.294	-176.576	East Lau Basin
NAUTILAU	NAUTILAU	Le Nadir	1989	Sample	ROV sample	ROV grab	Dive-384-17	NL-PL-17-07	-22.293	-176.575	East Lau Basin
NAUTILAU	NAUTILAU	Le Nadir	1989	Sample	ROV sample	ROV grab	Dive-384-17	NL-PL-17-09	-22.2897	-176.575	East Lau Basin
NAUTILAU	NAUTILAU	Le Nadir	1989	Sample	ROV sample	ROV grab	Dive-384-17	NL-PL-17-10	-22.2907	-176.571	East Lau Basin
NAUTILAU	NAUTILAU	Le Nadir	1989	Sample	ROV sample	ROV grab	Dive-384-17	NL-PL-17-11	-22.291	-176.571	East Lau Basin
NAUTILAU	NAUTILAU	Le Nadir	1989	Sample	ROV sample	ROV grab	Dive-384-17	NL-PL-17-12	-22.2908	-176.571	East Lau Basin
NAUTILAU	NAUTILAU	Le Nadir	1989	Sample	ROV sample	ROV grab	Dive-385-18	NL-PL-18-01	-22.2363	-176.607	East Lau Basin
NAUTILAU	NAUTILAU	Le Nadir	1989	Sample	ROV sample	ROV grab	Dive-385-18	NL-PL-18-02	-22.2382	-176.61	East Lau Basin
NAUTILAU	NAUTILAU	Le Nadir	1989	Sample	ROV sample	ROV grab	Dive-385-18	NL-PL-18-03	-22.22	-176.614	East Lau Basin
NAUTILAU	NAUTILAU	Le Nadir	1989	Sample	ROV sample	ROV grab	Dive-385-18	NL-PL-18-04	-22.2167	-176.609	East Lau Basin
NAUTILAU	NAUTILAU	Le Nadir	1989	Sample	ROV sample	ROV grab	Dive-385-18	NL-PL-18-05	-22.2168	-176.609	East Lau Basin
NAUTILAU	NAUTILAU	Le Nadir	1989	Sample	ROV sample	ROV grab	Dive-385-18	NL-PL-18-06	-22.2167	-176.61	East Lau Basin
NAUTILAU	NAUTILAU	Le Nadir	1989	Sample	ROV sample	ROV grab	Dive-386-19	NL-PL-19-01	-22.1795	-176.609	East Lau Basin
NAUTILAU	NAUTILAU	Le Nadir	1989	Sample	ROV sample	ROV grab	Dive-386-19	NL-PL-19-02	-22.1795	-176.615	East Lau Basin
NAUTILAU	NAUTILAU	Le Nadir	1989	Sample	ROV sample	ROV grab	Dive-386-19	NL-PL-19-03	-22.1793	-176.618	East Lau Basin
NAUTILAU	NAUTILAU	Le Nadir	1989	Sample	ROV sample	ROV grab	Dive-386-19	NL-PL-19-04	-22.1777	-176.622	East Lau Basin
NAUTILAU	NAUTILAU	Le Nadir	1989	Sample	ROV sample	ROV grab	Dive-386-19	NL-PL-19-05	-22.1778	-176.622	East Lau Basin
NAUTILAU	NAUTILAU	Le Nadir	1989	Sample	ROV sample	ROV grab	Dive-386-19	NL-PL-19-06	-22.1765	-176.621	East Lau Basin
NAUTILAU	NAUTILAU	Le Nadir	1989	Sample	ROV sample	ROV grab	Dive-386-19	NL-PL-19-07	-22.1707	-176.62	East Lau Basin
NAUTILAU	NAUTILAU	Le Nadir	1989	Sample	ROV sample	ROV grab	Dive-386-19	NL-PL-19-08	-22.1695	-176.627	East Lau Basin
NAUTILAU	NAUTILAU	Le Nadir	1989	Sample	ROV sample	ROV grab	Dive-386-19	NL-PL-19-09	-22.1702	-176.626	East Lau Basin
NAUTILAU	NAUTILAU	Le Nadir	1989	Sample	ROV sample	ROV grab	Dive-387-20	NL-PL-20-01	-22.2167	-176.609	East Lau Basin
NAUTILAU	NAUTILAU	Le Nadir	1989	Sample	ROV sample	ROV grab	Dive-387-20	NL-PL-20-02	-22.2167	-176.609	East Lau Basin
NAUTILAU	NAUTILAU	Le Nadir	1989	Sample	ROV sample	ROV grab	Dive-387-20	NL-PL-20-03	-22.2167	-176.609	East Lau Basin
NAUTILAU	NAUTILAU	Le Nadir	1989	Sample	ROV sample	ROV grab	Dive-387-20	NL-PL-20-04	-22.2167	-176.609	East Lau Basin
NAUTILAU	NAUTILAU	Le Nadir	1989	Sample	ROV sample	ROV grab	Dive-387-20	NL-PL-20-05	-22.2292	-176.609	East Lau Basin
NAUTILAU	NAUTILAU	Le Nadir	1989	Sample	ROV sample	ROV grab	Dive-388-21	NL-PL-21-01	-22.222	-176.62	East Lau Basin
NAUTILAU	NAUTILAU	Le Nadir	1989	Sample	ROV sample	ROV grab	Dive-388-21	NL-PL-21-02	-22.1945	-176.608	East Lau Basin
NAUTILAU	NAUTILAU	Le Nadir	1989	Sample	ROV sample	ROV grab	Dive-388-21	NL-PL-21-03	-22.202	-176.605	East Lau Basin
NAUTILAU	NAUTILAU	Le Nadir	1989	Sample	ROV sample	ROV grab	Dive-388-21	NL-PL-21-04	-22.2155	-176.609	East Lau Basin
NAUTILAU	NAUTILAU	Le Nadir	1989	Sample	ROV sample	ROV grab	Dive-389-22	NL-PL-22-01	-22.2155	-176.61	East Lau Basin
NAUTILAU	NAUTILAU	Le Nadir	1989	Sample	ROV sample	ROV grab	Dive-389-22	NL-PL-22-02	-22.2155	-176.61	East Lau Basin
NAUTILAU	NAUTILAU	Le Nadir	1989	Sample	ROV sample	ROV grab	Dive-389-22	NL-PL-22-03	-22.216	-176.609	East Lau Basin
NAUTILAU	NAUTILAU	Le Nadir	1989	Sample	ROV sample	ROV grab	Dive-389-22	NL-PL-22-04	-22.2165	-176.609	East Lau Basin
NAUTILAU	NAUTILAU	Le Nadir	1989	Sample	ROV sample	ROV grab	Dive-389-22	NL-PL-22-05	-22.216	-176.609	East Lau Basin
NAUTILAU	NAUTILAU	Le Nadir	1989	Sample	ROV sample	ROV grab	Dive-389-22	NL-PL-22-06	-22.216	-176.609	East Lau Basin
ODP135	ODP135	JOIDES Resolution	1992	Drill_hole	ODP	Drill hole	834A	135-834A	-18.5676	-177.862	West Lau Basin
ODP135	ODP135	JOIDES Resolution	1992	Drill_hole	ODP	Drill hole	834B	135-834B	-18.5675	-177.862	West Lau Basin
ODP135	ODP135	JOIDES Resolution	1992	Drill_hole	ODP	Drill hole	840A	135-840A	-22.2208	-175.749	Tofua Arc
ODP135	ODP135	JOIDES Resolution	1992	Drill_hole	ODP	Drill hole	840B	135-840B	-22.221	-175.749	Tofua Arc
ODP135	ODP135	JOIDES Resolution	1992	Drill_hole	ODP	Drill hole	840C	135-840C	-22.2206	-175.749	Tofua Arc
ODP135	ODP135	JOIDES Resolution	1992	Drill_hole	ODP	Drill hole	841A	135-841A	-23.3458	-175.298	Tonga Forearc
ODP135	ODP135	JOIDES Resolution	1992	Drill_hole	ODP	Drill hole	841B	135-841B	-23.3457	-175.298	Tonga Forearc
ODP135	ODP135	JOIDES Resolution	1992	Drill_hole	ODP	Drill hole	841C	135-841C	-23.3453	-175.298	Tonga Forearc
ODP135	ODP135	JOIDES Resolution	1992	Drill_hole	ODP	Drill hole	835A	135-835A	-18.501	-177.303	West Lau Basin
ODP135	ODP135	JOIDES Resolution	1992	Drill_hole	ODP	Drill hole	835B	135-835B	-18.5008	-177.303	West Lau Basin
ODP135	ODP135	JOIDES Resolution	1992	Drill_hole	ODP	Drill hole	836A	135-836A	-20.1416	-176.5	East Lau Basin
ODP135	ODP135	JOIDES Resolution	1992	Drill_hole	ODP	Drill hole	836B	135-836B	-20.1418	-176.5	East Lau Basin
ODP135	ODP135	JOIDES Resolution	1992	Drill_hole	ODP	Drill hole	837A	135-837A	-20.2218	-176.823	East Lau Basin
ODP135	ODP135	JOIDES Resolution	1992	Drill_hole	ODP	Drill hole	837B	135-837B	-20.222	-176.823	East Lau Basin
ODP135	ODP135	JOIDES Resolution	1992	Drill_hole	ODP	Drill hole	838A	135-838A	-20.827	-176.89	West Lau Basin
ODP135	ODP135	JOIDES Resolution	1992	Drill_hole	ODP	Drill hole	838B	135-838B	-20.8272	-176.89	West Lau Basin
ODP135	ODP135	JOIDES Resolution	1992	Drill_hole	ODP	Drill hole	839A	135-839A	-20.6922	-176.775	East Lau Basin
ODP135	ODP135	JOIDES Resolution	1992	Drill_hole	ODP	Drill hole	839B	135-839B	-20.709	-176.775	East Lau Basin
PPTU04WT	Papatua Leg 4	Thomas Washington	1986	Sample	Dredge	Dredge	02D	PPTU04WT-02D	-14.82	-173.313	Tonga Forearc
PPTU04WT	Papatua Leg 4	Thomas Washington	1986	Sample	Dredge	Dredge	03D	PPTU04WT-03D	-15.387	-174.678	Mangatolu
PPTU04WT	Papatua Leg 4	Thomas Washington	1986	Sample	Dredge	Dredge	04D	PPTU04WT-04D	-15.797	-174.578	Fonualei
PPTU04WT	Papatua Leg 4	Thomas Washington	1986	Sample	Dredge	Dredge	05D	PPTU04WT-05D	-15.577	-174.7	Mangatolu
PPTU04WT	Papatua Leg 4	Thomas Washington	1986	Sample	Dredge	Dredge	06D	PPTU04WT-06D	-15.332	-175.342	North Fonualei
PPTU04WT	Papatua Leg 4	Thomas Washington	1986	Sample	Dredge	Dredge	08D	PPTU04WT-08D	-15.86	-175.532	Niuafo'ou
PPTU04WT	Papatua Leg 4	Thomas Washington	1986	Sample	Dredge	Dredge	09D	PPTU04WT-09D	-15.41	-174.69	Mangatolu
PPTU04WT	Papatua Leg 4	Thomas Washington	1986	Sample	Dredge	Dredge	10D	PPTU04WT-10D	-15.083	-175.262	North Fonualei
PPTU04WT	Papatua Leg 4	Thomas Washington	1986	Sample	Dredge	Dredge	11D	PPTU04WT-11D	-15.477	-175.567	Niuafo'ou
PPTU04WT	Papatua Leg 4	Thomas Washington	1986	Sample	Dredge	Dredge	12D	PPTU04WT-12D	-16.29	-176.188	Zephyr
PPTU04WT	Papatua Leg 4	Thomas Washington	1986	Sample	Dredge	Dredge	13D	PPTU04WT-13D	-16.185	-176.233	Zephyr
PPTU04WT	Papatua Leg 4	Thomas Washington	1986	Sample	Dredge	Dredge	14D	PPTU04WT-14D	-16.643	-175.338	Zephyr
PPTU04WT	Papatua Leg 4	Thomas Washington	1986	Sample	Dredge	Dredge	15D	PPTU04WT-15D	-16.795	-176.193	Zephyr
PPTU04WT	Papatua Leg 4	Thomas Washington	1986	Sample	Dredge	Dredge	16D	PPTU04WT-16D	-17.403	-176.012	East Lau Basin
PPTU04WT	Papatua Leg 4	Thomas Washington	1986	Sample	Dredge	Dredge	17D	PPTU04WT-17D	-17.025	-176.518	Peggy Ridge
PPTU04WT	Papatua Leg 4	Thomas Washington	1986	Sample	Dredge	Dredge	18D	PPTU04WT-18D	-16.503	-177.593	East Lau Basin
PPTU04WT	Papatua Leg 4	Thomas Washington	1986	Sample	Dredge	Dredge	19D	PPTU04WT-19D	-16.167	-177.36	NW Lau
PPTU04WT	Papatua Leg 4	Thomas Washington	1986	Sample	Dredge	Dredge	20D	PPTU04WT-20D	-16.337	-177.495	Peggy Ridge
PPTU04WT	Papatua Leg 4	Thomas Washington	1986	Sample	Dredge	Dredge	21D	PPTU04WT-21D	-16.295	-177.878	West Lau Basin
PPTU04WT	Papatua Leg 4	Thomas Washington	1986	Sample	Dredge	Dredge	22D	PPTU04WT-22D	-15.793	-178.858	Qelelevu
PPTU04WT	Papatua Leg 4	Thomas Washington	1986	Sample	Dredge	Dredge	23D	PPTU04WT-23D	-15.205	-176.63	Southeast Futuna
PPTU04WT	Papatua Leg 4	Thomas Washington	1986	Sample	Dredge	Dredge	24D	PPTU04WT-24D	-15.427	-176.263	Rochambeau
PPTU04WT	Papatua Leg 4	Thomas Washington	1986	Sample	Dredge	Dredge	25D	PPTU04WT-25D	-15.815	-176.737	Zephyr
PPTU04WT	Papatua Leg 4	Thomas Washington	1986	Sample	Dredge	Dredge	26D	PPTU04WT-26D	-17.157	-175.928	East Lau Basin
PPTU04WT	Papatua Leg 4	Thomas Washington	1986	Sample	Dredge	Dredge	27D	PPTU04WT-27D	-17.615	-176.033	East Lau Basin
PPTU04WT	Papatua Leg 4	Thomas Washington	1986	Sample	Dredge	Dredge	28D	PPTU04WT-28D	-17.958	-175.887	Central Lau Basin
PPTU04WT	Papatua Leg 4	Thomas Washington	1986	Sample	Dredge	Dredge	29D	PPTU04WT-29D	-18.288	-176.93	East Lau Basin
PPTU04WT	Papatua Leg 4	Thomas Washington	1986	Sample	Dredge	Dredge	30D	PPTU04WT-30D	-18.55	-176.512	Central Lau Basin
PPTU04WT	Papatua Leg 4	Thomas Washington	1986	Sample	Dredge	Dredge	31D	PPTU04WT-31D	-18.658	-176.432	Central Lau Basin
PPTU04WT	Papatua Leg 4	Thomas Washington	1986	Sample	Dredge	Dredge	32D	PPTU04WT-32D	-18.863	-176.605	Central Lau Basin
PPTU04WT	Papatua Leg 4	Thomas Washington	1986	Sample	Dredge	Dredge	33D	PPTU04WT-33D	-18.858	-176.585	Central Lau Basin
PPTU04WT	Papatua Leg 4	Thomas Washington	1986	Sample	Dredge	Dredge	34D	PPTU04WT-34D	-18.44	-177.368	West Lau Basin
PPTU04WT	Papatua Leg 4	Thomas Washington	1986	Sample	Dredge	Dredge	35D	PPTU04WT-35D	-18.935	-175.742	East Lau Basin
PPTU04WT	Papatua Leg 4	Thomas Washington	1986	Sample	Dredge	Dredge	36D	PPTU04WT-36D	-19.175	-176.552	Central Lau Basin
PPTU05WT	Papatua Leg 5	Thomas Washington	1986	Sample	Dredge	Dredge	37D	PPTU05WT-37D	-22.038	-176.592	East Lau Basin
RNDB15WT	ROUNDABOUT Leg 15	Thomas Washington	1989	Sample	Dredge	Dredge	078D	RNDB15WT-078D	-20.163	-177.01	West Lau Basin
RNDB15WT	ROUNDABOUT Leg 15	Thomas Washington	1989	Sample	Dredge	Dredge	079D	RNDB15WT-079D	-20.107	-176.443	East Lau Basin
RNDB15WT	ROUNDABOUT Leg 15	Thomas Washington	1989	Sample	Dredge	Dredge	080D	RNDB15WT-080D	-19.753	-175.962	East Lau Basin
RNDB15WT	ROUNDABOUT Leg 15	Thomas Washington	1989	Sample	Dredge	Dredge	081D	RNDB15WT-081D	-19.828	-176.105	East Lau Basin
RNDB15WT	ROUNDABOUT Leg 15	Thomas Washington	1989	Sample	Dredge	Dredge	082D	RNDB15WT-082D	-19.908	-176.058	East Lau Basin
RNDB15WT	ROUNDABOUT Leg 15	Thomas Washington	1989	Sample	Dredge	Dredge	083D	RNDB15WT-083D	-20.165	-176.068	East Lau Basin
RNDB15WT	ROUNDABOUT Leg 15	Thomas Washington	1989	Sample	Dredge	Dredge	084D	RNDB15WT-084D	-20.227	-176.112	East Lau Basin
RNDB15WT	ROUNDABOUT Leg 15	Thomas Washington	1989	Sample	Dredge	Dredge	085D	RNDB15WT-085D	-19.983	-176.092	East Lau Basin
RNDB15WT	ROUNDABOUT Leg 15	Thomas Washington	1989	Sample	Dredge	Dredge	086D	RNDB15WT-086D	-19.662	-177.242	West Lau Basin
RNDB15WT	ROUNDABOUT Leg 15	Thomas Washington	1989	Sample	Dredge	Dredge	087D	RNDB15WT-087D	-19.568	-175.98	East Lau Basin
RNDB15WT	ROUNDABOUT Leg 15	Thomas Washington	1989	Sample	Dredge	Dredge	088D	RNDB15WT-088D	-19.403	-175.987	East Lau Basin
RNDB15WT	ROUNDABOUT Leg 15	Thomas Washington	1989	Sample	Dredge	Dredge	089D	RNDB15WT-089D	-19.2	-176.145	East Lau Basin
RNDB15WT	ROUNDABOUT Leg 15	Thomas Washington	1989	Sample	Dredge	Dredge	090D	RNDB15WT-090D	-19.112	-176.547	Central Lau Basin
RNDB15WT	ROUNDABOUT Leg 15	Thomas Washington	1989	Sample	Dredge	Dredge	091D	RNDB15WT-091D	-19.173	-176.538	Central Lau Basin
RNDB15WT	ROUNDABOUT Leg 15	Thomas Washington	1989	Sample	Dredge	Dredge	092D	RNDB15WT-092D	-19.238	-176.54	Central Lau Basin
RNDB15WT	ROUNDABOUT Leg 15	Thomas Washington	1989	Sample	Dredge	Dredge	093D	RNDB15WT-093D	-15.773	-174.835	Mangatolu
RNDB15WT	ROUNDABOUT Leg 15	Thomas Washington	1989	Sample	Dredge	Dredge	094D	RNDB15WT-094D	-15.543	-174.785	Mangatolu
RNDB15WT	ROUNDABOUT Leg 15	Thomas Washington	1989	Sample	Dredge	Dredge	095D	RNDB15WT-095D	-15.958	-174.788	Mangatolu
RNDB15WT	ROUNDABOUT Leg 15	Thomas Washington	1989	Sample	Dredge	Dredge	096D	RNDB15WT-096D	-15.682	-174.818	Mangatolu
RNDB15WT	ROUNDABOUT Leg 15	Thomas Washington	1989	Sample	Dredge	Dredge	097D	RNDB15WT-097D	-15.437	-174.69	Mangatolu
RNDB15WT	ROUNDABOUT Leg 15	Thomas Washington	1989	Sample	Dredge	Dredge	098D	RNDB15WT-098D	-15.375	-174.565	Mangatolu
RNDB15WT	ROUNDABOUT Leg 15	Thomas Washington	1989	Sample	Dredge	Dredge	099D	RNDB15WT-099D	-15.342	-174.612	Mangatolu
RNDB15WT	ROUNDABOUT Leg 15	Thomas Washington	1989	Sample	Dredge	Dredge	100D	RNDB15WT-100D	-15.505	-174.64	Mangatolu
RNDB15WT	ROUNDABOUT Leg 15	Thomas Washington	1989	Sample	Dredge	Dredge	101D	RNDB15WT-101D	-15.625	-174.885	Mangatolu
RNDB15WT	ROUNDABOUT Leg 15	Thomas Washington	1989	Sample	Dredge	Dredge	102D	RNDB15WT-102D	-17.833	-176.262	Central Lau Basin
RNDB15WT	ROUNDABOUT Leg 15	Thomas Washington	1989	Sample	Dredge	Dredge	103D	RNDB15WT-103D	-18.257	-176.255	Central Lau Basin
RNDB15WT	ROUNDABOUT Leg 15	Thomas Washington	1989	Sample	Dredge	Dredge	104D	RNDB15WT-104D	-18.497	-176.35	Central Lau Basin
RNDB15WT	ROUNDABOUT Leg 15	Thomas Washington	1989	Sample	Dredge	Dredge	105D	RNDB15WT-105D	-18.808	-176.457	Central Lau Basin
RNDB15WT	ROUNDABOUT Leg 15	Thomas Washington	1989	Sample	Dredge	Dredge	106D	RNDB15WT-106D	-19.375	-176.583	East Lau Basin
RNDB15WT	ROUNDABOUT Leg 15	Thomas Washington	1989	Sample	Dredge	Dredge	107D	RNDB15WT-107D	-19.29	-176.537	Central Lau Basin
RNDB15WT	ROUNDABOUT Leg 15	Thomas Washington	1989	Sample	Dredge	Dredge	108D	RNDB15WT-108D	-19.37	-176.158	East Lau Basin
RNDB15WT	ROUNDABOUT Leg 15	Thomas Washington	1989	Sample	Dredge	Dredge	109D	RNDB15WT-109D	-20.107	-176.153	East Lau Basin
RNDB15WT	ROUNDABOUT Leg 15	Thomas Washington	1989	Sample	Dredge	Dredge	110D	RNDB15WT-110D	-19.033	-176.56	Central Lau Basin
RNDB15WT	ROUNDABOUT Leg 15	Thomas Washington	1989	Sample	Dredge	Dredge	111D	RNDB15WT-111D	-19.017	-176.46	East Lau Basin
RNDB15WT	ROUNDABOUT Leg 15	Thomas Washington	1989	Sample	Dredge	Dredge	112D	RNDB15WT-112D	-18.595	-176.462	Central Lau Basin
RNDB15WT	ROUNDABOUT Leg 15	Thomas Washington	1989	Sample	Dredge	Dredge	113D	RNDB15WT-113D	-18.667	-177.263	West Lau Basin
RNDB15WT	ROUNDABOUT Leg 15	Thomas Washington	1989	Sample	Dredge	Dredge	114D	RNDB15WT-114D	-18.385	-177.282	West Lau Basin
RNDB15WT	ROUNDABOUT Leg 15	Thomas Washington	1989	Sample	Dredge	Dredge	115D	RNDB15WT-115D	-18.132	-177.642	West Lau Basin
RNDB15WT	ROUNDABOUT Leg 15	Thomas Washington	1989	Sample	Dredge	Dredge	116D	RNDB15WT-116D	-15.922	-177.12	Zephyr
RNDB15WT	ROUNDABOUT Leg 15	Thomas Washington	1989	Sample	Dredge	Dredge	117D	RNDB15WT-117D	-16.042	-177.113	Zephyr
RNDB15WT	ROUNDABOUT Leg 15	Thomas Washington	1989	Sample	Dredge	Dredge	118D	RNDB15WT-118D	-16.213	-176.373	Zephyr
RNDB15WT	ROUNDABOUT Leg 15	Thomas Washington	1989	Sample	Dredge	Dredge	119D	RNDB15WT-119D	-16.24	-176.293	Zephyr
RNDB15WT	ROUNDABOUT Leg 15	Thomas Washington	1989	Sample	Dredge	Dredge	120D	RNDB15WT-120D	-16.13	-174.787	Mangatolu
RNDB15WT	ROUNDABOUT Leg 15	Thomas Washington	1989	Sample	Dredge	Dredge	121D	RNDB15WT-121D	-15.862	-174.852	Mangatolu
RNDB15WT	ROUNDABOUT Leg 15	Thomas Washington	1989	Sample	Dredge	Dredge	122D	RNDB15WT-122D	-15.613	-174.812	Mangatolu
RNDB15WT	ROUNDABOUT Leg 15	Thomas Washington	1989	Sample	Dredge	Dredge	123D	RNDB15WT-123D	-15.492	-174.738	Mangatolu
RNDB15WT	ROUNDABOUT Leg 15	Thomas Washington	1989	Sample	Dredge	Dredge	124D	RNDB15WT-124D	-15.303	-174.437	Northeast Lau
RNDB15WT	ROUNDABOUT Leg 15	Thomas Washington	1989	Sample	Dredge	Dredge	125D	RNDB15WT-125D	-15.002	-172.282	Pacific Seafloor
RR1211	NOAA Vents: Submarine Ring of Fire	Roger Revelle	2012	Sample	ROV sample	ROV grab	Q327	Q327-Biomacro 01	-15.0946	-173.749	Tonga Forearc
RR1211	NOAA Vents: Submarine Ring of Fire	Roger Revelle	2012	Sample	ROV sample	ROV grab	Q327	Q327-Rock 02	-15.0957	-173.75	Tonga Forearc
RR1211	NOAA Vents: Submarine Ring of Fire	Roger Revelle	2012	Sample	ROV sample	ROV grab	Q327	Q327-Biosed 06	-15.0942	-173.748	Tonga Forearc
RR1211	NOAA Vents: Submarine Ring of Fire	Roger Revelle	2012	Sample	ROV sample	ROV grab	Q332	Q332-Rock 01	-15.0946	-173.75	Tonga Forearc
RR1211	NOAA Vents: Submarine Ring of Fire	Roger Revelle	2012	Sample	ROV sample	ROV grab	Q332	Q332-Rock 02	-15.0946	-173.75	Tonga Forearc
RR1211	NOAA Vents: Submarine Ring of Fire	Roger Revelle	2012	Sample	ROV sample	ROV grab	Q332	Q332-Rock 03	-15.094	-173.749	Tonga Forearc
RR1211	NOAA Vents: Submarine Ring of Fire	Roger Revelle	2012	Sample	ROV sample	ROV grab	Q332	Q332-Rock 04	-15.0944	-173.748	Tonga Forearc
RR1211	NOAA Vents: Submarine Ring of Fire	Roger Revelle	2012	Sample	ROV sample	ROV grab	Q332	Q332-Rock 05	-15.094	-173.748	Tonga Forearc
RR1211	NOAA Vents: Submarine Ring of Fire	Roger Revelle	2012	Observation	ROV observation	ROV Marum Quest 4000	Q327	Q327	-15.0963	-173.75	Tonga Forearc
RR1211	NOAA Vents: Submarine Ring of Fire	Roger Revelle	2012	Observation	ROV observation	ROV Marum Quest 4000	Q332	Q332	-15.0938	-173.751	Tonga Forearc
RR1211	NOAA Vents: Submarine Ring of Fire	Roger Revelle	2012	Observation	ROV observation	ROV Marum Quest 4000	Q324	Q324	-15.3743	-174.003	Northeast Lau
RR1211	NOAA Vents: Submarine Ring of Fire	Roger Revelle	2012	Observation	ROV observation	ROV Marum Quest 4000	Q322	Q322	-22.2167	-176.61	East Lau Basin
RR1211	NOAA Vents: Submarine Ring of Fire	Roger Revelle	2012	Sample	ROV sample	ROV grab	Q326	Q326-biomacro 01	-15.1665	-173.576	Tofua Arc
RR1211	NOAA Vents: Submarine Ring of Fire	Roger Revelle	2012	Sample	ROV sample	ROV grab	Q326	Q326-Rock 02	-15.1665	-173.576	Tofua Arc
RR1211	NOAA Vents: Submarine Ring of Fire	Roger Revelle	2012	Sample	ROV sample	ROV grab	Q326	Q326-Rock 03	-15.1665	-173.576	Tofua Arc
RR1211	NOAA Vents: Submarine Ring of Fire	Roger Revelle	2012	Sample	ROV sample	ROV grab	Q326	Q326-Rock 04a	-15.1665	-173.576	Tofua Arc
RR1211	NOAA Vents: Submarine Ring of Fire	Roger Revelle	2012	Sample	ROV sample	ROV grab	Q326	Q326-Rock 04b	-15.1665	-173.576	Tofua Arc
RR1211	NOAA Vents: Submarine Ring of Fire	Roger Revelle	2012	Sample	ROV sample	ROV grab	Q333	Q333-Rock 03	-15.1655	-173.574	Tofua Arc
RR1211	NOAA Vents: Submarine Ring of Fire	Roger Revelle	2012	Observation	ROV observation	ROV Marum Quest 4000	Q326	Q326	-15.1666	-173.575	Tofua Arc
RR1211	NOAA Vents: Submarine Ring of Fire	Roger Revelle	2012	Observation	ROV observation	ROV Marum Quest 4000	Q333	Q333	-15.166	-173.576	Tofua Arc
RR1211	NOAA Vents: Submarine Ring of Fire	Roger Revelle	2012	Sample	ROV sample	ROV grab	Q330	Q330-Rock 08	-15.0816	-173.555	Tofua Arc
RR1211	NOAA Vents: Submarine Ring of Fire	Roger Revelle	2012	Sample	ROV sample	ROV grab	Q330	Q330-Rock 15	-15.0816	-173.555	Tofua Arc
RR1211	NOAA Vents: Submarine Ring of Fire	Roger Revelle	2012	Observation	ROV observation	ROV Marum Quest 4000	Q330	Q330	-15.081	-173.554	Tofua Arc
RR1211	NOAA Vents: Submarine Ring of Fire	Roger Revelle	2012	Sample	ROV sample	ROV grab	Q325	Q325-Rock 01	-15.0223	-173.787	Tonga Forearc
RR1211	NOAA Vents: Submarine Ring of Fire	Roger Revelle	2012	Sample	ROV sample	ROV grab	Q325	Q325-Rock 02	-15.0223	-173.785	Tonga Forearc
RR1211	NOAA Vents: Submarine Ring of Fire	Roger Revelle	2012	Sample	ROV sample	ROV grab	Q325	Q325-Rock 03	-15.0223	-173.785	Tonga Forearc
RR1211	NOAA Vents: Submarine Ring of Fire	Roger Revelle	2012	Sample	ROV sample	ROV grab	Q325	Q325-Rock 04	-15.0195	-173.786	Tonga Forearc
RR1211	NOAA Vents: Submarine Ring of Fire	Roger Revelle	2012	Sample	ROV sample	ROV grab	Q328	Q328-biogeo-01	-15.0171	-173.788	Tonga Forearc
RR1211	NOAA Vents: Submarine Ring of Fire	Roger Revelle	2012	Sample	ROV sample	ROV grab	Q328	Q328-Rock 03	-15.0173	-173.788	Tonga Forearc
RR1211	NOAA Vents: Submarine Ring of Fire	Roger Revelle	2012	Sample	ROV sample	ROV grab	Q328	Q328-Geobio 11	-15.0172	-173.788	Tonga Forearc
RR1211	NOAA Vents: Submarine Ring of Fire	Roger Revelle	2012	Sample	ROV sample	ROV grab	Q328	Q328-Rock 12	-15.0177	-173.788	Tonga Forearc
RR1211	NOAA Vents: Submarine Ring of Fire	Roger Revelle	2012	Sample	ROV sample	ROV grab	Q328	Q328-Rock 13	-15.0178	-173.788	Tonga Forearc
RR1211	NOAA Vents: Submarine Ring of Fire	Roger Revelle	2012	Sample	ROV sample	ROV grab	Q328	Q328-Rock 14	-15.0178	-173.788	Tonga Forearc
RR1211	NOAA Vents: Submarine Ring of Fire	Roger Revelle	2012	Sample	ROV sample	ROV grab	Q328	Q328-Rock-15	-15.0173	-173.788	Tonga Forearc
RR1211	NOAA Vents: Submarine Ring of Fire	Roger Revelle	2012	Observation	ROV observation	ROV Marum Quest 4000	Q325	Q325	-15.0253	-173.786	Tonga Forearc
RR1211	NOAA Vents: Submarine Ring of Fire	Roger Revelle	2012	Observation	ROV observation	ROV Marum Quest 4000	Q328	Q328	-15.016	-173.788	Tonga Forearc
RR1211	NOAA Vents: Submarine Ring of Fire	Roger Revelle	2012	Sample	ROV sample	ROV grab	Q331	Q331-Rock 01	-15.0056	-173.794	Tonga Forearc
RR1211	NOAA Vents: Submarine Ring of Fire	Roger Revelle	2012	Sample	ROV sample	ROV grab	Q331	Q331-Rock 02	-15.0056	-173.794	Tonga Forearc
RR1211	NOAA Vents: Submarine Ring of Fire	Roger Revelle	2012	Sample	ROV sample	ROV grab	Q331	Q331-Rock 11	-15.0049	-173.794	Tonga Forearc
RR1211	NOAA Vents: Submarine Ring of Fire	Roger Revelle	2012	Sample	ROV sample	ROV grab	Q331	Q331-Rock 16	-15.0044	-173.793	Tonga Forearc
RR1211	NOAA Vents: Submarine Ring of Fire	Roger Revelle	2012	Sample	ROV sample	ROV grab	Q331	Q331-Rock 17	-15.0044	-173.793	Tonga Forearc
RR1211	NOAA Vents: Submarine Ring of Fire	Roger Revelle	2012	Observation	ROV observation	ROV Marum Quest 4000	Q331	Q331	-15.0057	-173.794	Tonga Forearc
RR1211	NOAA Vents: Submarine Ring of Fire	Roger Revelle	2012	Sample	ROV sample	ROV grab	Q329	Q329-Rock 01	-14.9148	-173.78	Tonga Forearc
RR1211	NOAA Vents: Submarine Ring of Fire	Roger Revelle	2012	Sample	ROV sample	ROV grab	Q329	Q329-Rock 02	-14.9144	-173.78	Tonga Forearc
RR1211	NOAA Vents: Submarine Ring of Fire	Roger Revelle	2012	Sample	ROV sample	ROV grab	Q329	Q329-Rock 03	-14.9136	-173.78	Tonga Forearc
RR1211	NOAA Vents: Submarine Ring of Fire	Roger Revelle	2012	Observation	ROV observation	ROV Marum Quest 4000	Q329	Q329	-14.9161	-173.779	Tonga Forearc
RR1211	NOAA Vents: Submarine Ring of Fire	Roger Revelle	2012	Sample	ROV sample	ROV grab	Q323	Q323-Rock 01	-18.1221	-176.354	Central Lau Basin
RR1211	NOAA Vents: Submarine Ring of Fire	Roger Revelle	2012	Sample	ROV sample	ROV grab	Q323	Q323-Rock 03	-18.0281	-176.322	Central Lau Basin
RR1211	NOAA Vents: Submarine Ring of Fire	Roger Revelle	2012	Observation	ROV observation	ROV Marum Quest 4000	Q323	Q323	-17.5439	-174.578	Fonualei
RR1211	NOAA Vents: Submarine Ring of Fire	Roger Revelle	2012	Sample	ROV sample	ROV grab	Q324	Q324-Rock 01	-17.941	-176.359	Central Lau Basin
RR1211	NOAA Vents: Submarine Ring of Fire	Roger Revelle	2012	Sample	ROV sample	ROV grab	Q324	Q324-Giobio6	-15.3916	-174.252	Northeast Lau
RR1211	NOAA Vents: Submarine Ring of Fire	Roger Revelle	2012	Sample	ROV sample	ROV grab	Q324	Q324-Rock 07	-15.3943	-174.254	Northeast Lau
RR1211	NOAA Vents: Submarine Ring of Fire	Roger Revelle	2012	Sample	ROV sample	ROV grab	Q324	Q324-Rock 08	-15.0943	-173.748	Tonga Forearc
RR1211	NOAA Vents: Submarine Ring of Fire	Roger Revelle	2012	Sample	ROV sample	ROV grab	Q324	Q324-biomacro9	-15.0943	-173.748	Tonga Forearc
RR1211	NOAA Vents: Submarine Ring of Fire	Roger Revelle	2012	Sample	ROV sample	ROV grab	Q324	Q324-Rock 12	-15.3764	-174.002	Northeast Lau
RR1310	Tracing the path of the Rurutu Hotspot	Roger Revelle	2013	Sample	Dredge	Dredge	D44	RR1310-D44	-14.659	-175.86	Rochambeau
RR1310	Tracing the path of the Rurutu Hotspot	Roger Revelle	2013	Sample	Dredge	Dredge	D42	RR1310-D42	-14.678	-174.891	North Fonualei
RR1507	Geochemical effects on the functional microbial community dynamics of hydrothermal deposits along the Eastern Lau Spreading Center	Roger Revelle	2015	Observation	ROV observation	ROV Jason II	J2-814	J2-814	-20.054	-176.134	East Lau Basin
RR1507	Geochemical effects on the functional microbial community dynamics of hydrothermal deposits along the Eastern Lau Spreading Center	Roger Revelle	2015	Observation	ROV observation	ROV Jason II	J2-815	J2-815	-20.761	-176.191	East Lau Basin
RR1507	Geochemical effects on the functional microbial community dynamics of hydrothermal deposits along the Eastern Lau Spreading Center	Roger Revelle	2015	Observation	ROV observation	ROV Jason II	J2-816	J2-816	-22.1787	-176.603	East Lau Basin
RR1507	Geochemical effects on the functional microbial community dynamics of hydrothermal deposits along the Eastern Lau Spreading Center	Roger Revelle	2015	Observation	ROV observation	ROV Jason II	J2-817	J2-817	-22.1799	-176.601	East Lau Basin
RR1507	Geochemical effects on the functional microbial community dynamics of hydrothermal deposits along the Eastern Lau Spreading Center	Roger Revelle	2015	Observation	ROV observation	ROV Jason II	J2-818	J2-818	-22.1798	-176.603	East Lau Basin
RR1507	Geochemical effects on the functional microbial community dynamics of hydrothermal deposits along the Eastern Lau Spreading Center	Roger Revelle	2015	Observation	ROV observation	ROV Jason II	J2-819	J2-819	-21.9912	-176.569	East Lau Basin
SITKAP	SITKAP	Ka'imikai-O-Kanaloa	2006	Sample	Submersible sample	PISCES V	P5-639	P5-639-R1	-24.8094	-177.001	Tofua Arc
SITKAP	SITKAP	Ka'imikai-O-Kanaloa	2006	Sample	Submersible sample	PISCES V	P5-639	P5-639-R10	-24.8043	-177.001	Tofua Arc
SITKAP	SITKAP	Ka'imikai-O-Kanaloa	2006	Sample	Submersible sample	PISCES V	P5-639	P5-639-R11	-24.8043	-177.001	Tofua Arc
SITKAP	SITKAP	Ka'imikai-O-Kanaloa	2006	Sample	Submersible sample	PISCES V	P5-639	P5-639-R12	-24.8043	-177.001	Tofua Arc
SITKAP	SITKAP	Ka'imikai-O-Kanaloa	2006	Sample	Submersible sample	PISCES V	P5-639	P5-639-R13	-24.804	-177.002	Tofua Arc
SITKAP	SITKAP	Ka'imikai-O-Kanaloa	2006	Sample	Submersible sample	PISCES V	P5-639	P5-639-R14	-24.804	-177.002	Tofua Arc
SITKAP	SITKAP	Ka'imikai-O-Kanaloa	2006	Sample	Submersible sample	PISCES V	P5-639	P5-639-R15	-24.8042	-177.002	Tofua Arc
SITKAP	SITKAP	Ka'imikai-O-Kanaloa	2006	Sample	Submersible sample	PISCES V	P5-639	P5-639-R16	-24.8042	-177.002	Tofua Arc
SITKAP	SITKAP	Ka'imikai-O-Kanaloa	2006	Sample	Submersible sample	PISCES V	P5-639	P5-639-R17	-24.8058	-177.001	Tofua Arc
SITKAP	SITKAP	Ka'imikai-O-Kanaloa	2006	Sample	Submersible sample	PISCES V	P5-639	P5-639-R18	-24.8067	-177.003	Tofua Arc
SITKAP	SITKAP	Ka'imikai-O-Kanaloa	2006	Sample	Submersible sample	PISCES V	P5-639	P5-639-R19	-24.8067	-177.003	Tofua Arc
SITKAP	SITKAP	Ka'imikai-O-Kanaloa	2006	Sample	Submersible sample	PISCES V	P5-639	P5-639-R2	-24.8094	-177.001	Tofua Arc
SITKAP	SITKAP	Ka'imikai-O-Kanaloa	2006	Sample	Submersible sample	PISCES V	P5-639	P5-639-R20	-24.8067	-177.003	Tofua Arc
SITKAP	SITKAP	Ka'imikai-O-Kanaloa	2006	Sample	Submersible sample	PISCES V	P5-639	P5-639-R21	-24.8067	-177.003	Tofua Arc
SITKAP	SITKAP	Ka'imikai-O-Kanaloa	2006	Sample	Submersible sample	PISCES V	P5-639	P5-639-R22	-24.8067	-177.003	Tofua Arc
SITKAP	SITKAP	Ka'imikai-O-Kanaloa	2006	Sample	Submersible sample	PISCES V	P5-639	P5-639-R3	-24.8094	-177.001	Tofua Arc
SITKAP	SITKAP	Ka'imikai-O-Kanaloa	2006	Sample	Submersible sample	PISCES V	P5-639	P5-639-R4	-24.808	-177	Tofua Arc
SITKAP	SITKAP	Ka'imikai-O-Kanaloa	2006	Sample	Submersible sample	PISCES V	P5-639	P5-639-R5	-24.8043	-177.002	Tofua Arc
SITKAP	SITKAP	Ka'imikai-O-Kanaloa	2006	Sample	Submersible sample	PISCES V	P5-639	P5-639-R6	-24.8072	-176.999	Tofua Arc
SITKAP	SITKAP	Ka'imikai-O-Kanaloa	2006	Sample	Submersible sample	PISCES V	P5-639	P5-639-R7	-24.8069	-176.999	Tofua Arc
SITKAP	SITKAP	Ka'imikai-O-Kanaloa	2006	Sample	Submersible sample	PISCES V	P5-639	P5-639-R8	-24.8077	-176.998	Tofua Arc
SITKAP	SITKAP	Ka'imikai-O-Kanaloa	2006	Sample	Submersible sample	PISCES V	P5-639	P5-639-R9	-24.8045	-177.002	Tofua Arc
SITKAP	SITKAP	Ka'imikai-O-Kanaloa	2006	Sample	Submersible sample	PISCES V	P5-639	P5-639-Sc#1	-24.8092	-177.007	Tofua Arc
SITKAP	SITKAP	Ka'imikai-O-Kanaloa	2006	Sample	Submersible sample	PISCES V	P5-639	P5-639-Sc#2	-24.8092	-177.007	Tofua Arc
SITKAP	SITKAP	Ka'imikai-O-Kanaloa	2006	Sample	Submersible sample	PISCES V	P5-639	P5-639-Sc#3	-24.8063	-177.002	Tofua Arc
SITKAP	SITKAP	Ka'imikai-O-Kanaloa	2006	Observation	Manned submersible	PISCES V Dive	P5-639	P5-639	-24.8093	-177.007	Tofua Arc
SITKAP	SITKAP	Ka'imikai-O-Kanaloa	2006	Sample	Submersible sample	PISCES V	P5-638	P5-638-R1	-24.8003	-177.01	Tofua Arc
SITKAP	SITKAP	Ka'imikai-O-Kanaloa	2006	Sample	Submersible sample	PISCES V	P5-638	P5-638-R2	-24.8043	-177.003	Tofua Arc
SITKAP	SITKAP	Ka'imikai-O-Kanaloa	2006	Sample	Submersible sample	PISCES V	P5-638	P5-638-R3	-24.8045	-177.002	Tofua Arc
SITKAP	SITKAP	Ka'imikai-O-Kanaloa	2006	Sample	Submersible sample	PISCES V	P5-638	P5-638-R4	-24.8067	-177.003	Tofua Arc
SITKAP	SITKAP	Ka'imikai-O-Kanaloa	2006	Sample	Submersible sample	PISCES V	P5-638	P5-638-Sc#5	-24.8045	-177.002	Tofua Arc
SITKAP	SITKAP	Ka'imikai-O-Kanaloa	2006	Observation	Manned submersible	PISCES V Dive	P5-638	P5-638	-24.8012	-177.012	Tofua Arc
SITKAP	SITKAP	Ka'imikai-O-Kanaloa	2006	Observation	ROV observation	ROV RCV-150	RCV-313	RCV-313	-24.81	-177	Tofua Arc
SITKAP	SITKAP	Ka'imikai-O-Kanaloa	2006	Sample	Submersible sample	PISCES V	P5-635	P5-635-R1	-24.8032	-177.011	Tofua Arc
SITKAP	SITKAP	Ka'imikai-O-Kanaloa	2006	Observation	Manned submersible	PISCES V Dive	P5-635	P5-635	-24.8011	-177.014	Tofua Arc
SITKAP	SITKAP	Ka'imikai-O-Kanaloa	2006	Sample	Submersible sample	PISCES V	P5-637	P5-637-R1	-24.8038	-177.019	Tofua Arc
SITKAP	SITKAP	Ka'imikai-O-Kanaloa	2006	Sample	Submersible sample	PISCES V	P5-637	P5-637-R2	-24.805	-177.019	Tofua Arc
SITKAP	SITKAP	Ka'imikai-O-Kanaloa	2006	Sample	Submersible sample	PISCES V	P5-637	P5-637-R3	-24.8084	-177.02	Tofua Arc
SITKAP	SITKAP	Ka'imikai-O-Kanaloa	2006	Sample	Submersible sample	PISCES V	P5-637	P5-637-Sc#1	-24.8018	-177.02	Tofua Arc
SITKAP	SITKAP	Ka'imikai-O-Kanaloa	2006	Sample	Submersible sample	PISCES V	P5-637	P5-637-Sc#2	-24.805	-177.019	Tofua Arc
SITKAP	SITKAP	Ka'imikai-O-Kanaloa	2006	Sample	Submersible sample	PISCES V	P5-637	P5-637-Sc#3	-24.8087	-177.018	Tofua Arc
SITKAP	SITKAP	Ka'imikai-O-Kanaloa	2006	Sample	Submersible sample	PISCES V	P5-637	P5-637-Sc#4	-24.8096	-177.018	Tofua Arc
SITKAP	SITKAP	Ka'imikai-O-Kanaloa	2006	Observation	Manned submersible	PISCES V Dive	P5-637	P5-637	-24.8018	-177.02	Tofua Arc
SITKAP	SITKAP	Ka'imikai-O-Kanaloa	2006	Sample	Submersible sample	PISCES IV	P4-137	P4-137-A1	-24.8074	-176	Tofua Arc
SITKAP	SITKAP	Ka'imikai-O-Kanaloa	2006	Sample	Submersible sample	PISCES IV	P4-137	P4-137-A2	-24.8074	-176	Tofua Arc
SITKAP	SITKAP	Ka'imikai-O-Kanaloa	2006	Sample	Submersible sample	PISCES IV	P4-137	P4-137-A3	-24.8074	-176	Tofua Arc
SITKAP	SITKAP	Ka'imikai-O-Kanaloa	2006	Sample	Submersible sample	PISCES IV	P4-137	P4-137-A4	-24.8074	-176	Tofua Arc
SITKAP	SITKAP	Ka'imikai-O-Kanaloa	2006	Sample	Submersible sample	PISCES IV	P4-137	P4-137-A5	-24.8074	-176	Tofua Arc
SITKAP	SITKAP	Ka'imikai-O-Kanaloa	2006	Sample	Submersible sample	PISCES IV	P4-137	P4-137-A6	-24.8075	-177	Tofua Arc
SITKAP	SITKAP	Ka'imikai-O-Kanaloa	2006	Sample	Submersible sample	PISCES IV	P4-137	P4-137-R1	-24.8074	-177	Tofua Arc
SITKAP	SITKAP	Ka'imikai-O-Kanaloa	2006	Sample	Submersible sample	PISCES IV	P4-137	P4-137-R2	-24.8075	-177	Tofua Arc
SITKAP	SITKAP	Ka'imikai-O-Kanaloa	2006	Sample	Submersible sample	PISCES IV	P4-137	P4-137-Sc#5	-24.8075	-177	Tofua Arc
SITKAP	SITKAP	Ka'imikai-O-Kanaloa	2006	Sample	Submersible sample	PISCES IV	P4-138	P4-138-A1	-24.8069	-176.999	Tofua Arc
SITKAP	SITKAP	Ka'imikai-O-Kanaloa	2006	Sample	Submersible sample	PISCES IV	P4-138	P4-138-A2	-24.8069	-176.999	Tofua Arc
SITKAP	SITKAP	Ka'imikai-O-Kanaloa	2006	Sample	Submersible sample	PISCES IV	P4-138	P4-138-R1	-24.8079	-177	Tofua Arc
SITKAP	SITKAP	Ka'imikai-O-Kanaloa	2006	Sample	Submersible sample	PISCES IV	P4-138	P4-138-R2	-24.8079	-177	Tofua Arc
SITKAP	SITKAP	Ka'imikai-O-Kanaloa	2006	Sample	Submersible sample	PISCES IV	P4-138	P4-138-R3	-24.8067	-177.002	Tofua Arc
SITKAP	SITKAP	Ka'imikai-O-Kanaloa	2006	Sample	Submersible sample	PISCES IV	P4-138	P4-138-R4	-24.8042	-177.002	Tofua Arc
SITKAP	SITKAP	Ka'imikai-O-Kanaloa	2006	Sample	Submersible sample	PISCES IV	P4-138	P4-138-S1	-24.8069	-176.999	Tofua Arc
SITKAP	SITKAP	Ka'imikai-O-Kanaloa	2006	Sample	Submersible sample	PISCES IV	P4-138	P4-138-Sc#5	-24.8067	-177.002	Tofua Arc
SITKAP	SITKAP	Ka'imikai-O-Kanaloa	2006	Observation	Manned submersible	PISCES IV Dive	P4-137	P4-137	-24.8066	-177	Tofua Arc
SITKAP	SITKAP	Ka'imikai-O-Kanaloa	2006	Observation	Manned submersible	PISCES IV Dive	P4-138	P4-138	-24.8076	-176.999	Tofua Arc
SITKAP	SITKAP	Ka'imikai-O-Kanaloa	2006	Sample	Submersible sample	PISCES V	P5-636	P5-636-R1	-24.8047	-177.015	Tofua Arc
SITKAP	SITKAP	Ka'imikai-O-Kanaloa	2006	Sample	Submersible sample	PISCES V	P5-636	P5-636-R2	-24.8056	-177.018	Tofua Arc
SITKAP	SITKAP	Ka'imikai-O-Kanaloa	2006	Sample	Submersible sample	PISCES V	P5-636	P5-636-R3	-24.8056	-177.019	Tofua Arc
SITKAP	SITKAP	Ka'imikai-O-Kanaloa	2006	Sample	Submersible sample	PISCES V	P5-636	P5-636-Sc#1	-24.8048	-177.015	Tofua Arc
SITKAP	SITKAP	Ka'imikai-O-Kanaloa	2006	Sample	Submersible sample	PISCES V	P5-636	P5-636-Sc#5	-24.8047	-177.015	Tofua Arc
SITKAP	SITKAP	Ka'imikai-O-Kanaloa	2006	Observation	Manned submersible	PISCES V Dive	P5-636	P5-636	-24.8	-177.02	Tofua Arc
SITKAP	SITKAP	Ka'imikai-O-Kanaloa	2006	Sample	Submersible sample	PISCES V	P5-641	P5-641-A10	-24.5615	-176.912	Tofua Arc
SITKAP	SITKAP	Ka'imikai-O-Kanaloa	2006	Sample	Submersible sample	PISCES V	P5-641	P5-641-A6	-24.5615	-176.912	Tofua Arc
SITKAP	SITKAP	Ka'imikai-O-Kanaloa	2006	Sample	Submersible sample	PISCES V	P5-641	P5-641-A7	-24.5615	-176.912	Tofua Arc
SITKAP	SITKAP	Ka'imikai-O-Kanaloa	2006	Sample	Submersible sample	PISCES V	P5-641	P5-641-A8	-24.5615	-176.912	Tofua Arc
SITKAP	SITKAP	Ka'imikai-O-Kanaloa	2006	Sample	Submersible sample	PISCES V	P5-641	P5-641-A9	-24.5615	-176.912	Tofua Arc
SITKAP	SITKAP	Ka'imikai-O-Kanaloa	2006	Sample	Submersible sample	PISCES V	P5-641	P5-641-R1	-24.5637	-176.916	Tofua Arc
SITKAP	SITKAP	Ka'imikai-O-Kanaloa	2006	Sample	Submersible sample	PISCES V	P5-641	P5-641-R10	-24.5615	-176.912	Tofua Arc
SITKAP	SITKAP	Ka'imikai-O-Kanaloa	2006	Sample	Submersible sample	PISCES V	P5-641	P5-641-R11	-24.5637	-176.916	Tofua Arc
SITKAP	SITKAP	Ka'imikai-O-Kanaloa	2006	Sample	Submersible sample	PISCES V	P5-641	P5-641-R12	-24.5615	-176.912	Tofua Arc
SITKAP	SITKAP	Ka'imikai-O-Kanaloa	2006	Sample	Submersible sample	PISCES V	P5-641	P5-641-R13	-24.5615	-176.912	Tofua Arc
SITKAP	SITKAP	Ka'imikai-O-Kanaloa	2006	Sample	Submersible sample	PISCES V	P5-641	P5-641-R14	-24.5615	-176.912	Tofua Arc
SITKAP	SITKAP	Ka'imikai-O-Kanaloa	2006	Sample	Submersible sample	PISCES V	P5-641	P5-641-R15	-24.561	-176.911	Tofua Arc
SITKAP	SITKAP	Ka'imikai-O-Kanaloa	2006	Sample	Submersible sample	PISCES V	P5-641	P5-641-R2	-24.5615	-176.912	Tofua Arc
SITKAP	SITKAP	Ka'imikai-O-Kanaloa	2006	Sample	Submersible sample	PISCES V	P5-641	P5-641-R3	-24.561	-176.911	Tofua Arc
SITKAP	SITKAP	Ka'imikai-O-Kanaloa	2006	Sample	Submersible sample	PISCES V	P5-641	P5-641-R4	-24.5604	-176.911	Tofua Arc
SITKAP	SITKAP	Ka'imikai-O-Kanaloa	2006	Sample	Submersible sample	PISCES V	P5-641	P5-641-R5	-24.5659	-176.915	Tofua Arc
SITKAP	SITKAP	Ka'imikai-O-Kanaloa	2006	Sample	Submersible sample	PISCES V	P5-641	P5-641-R6	-24.5641	-176.912	Tofua Arc
SITKAP	SITKAP	Ka'imikai-O-Kanaloa	2006	Sample	Submersible sample	PISCES V	P5-641	P5-641-R7	-24.5615	-176.912	Tofua Arc
SITKAP	SITKAP	Ka'imikai-O-Kanaloa	2006	Sample	Submersible sample	PISCES V	P5-641	P5-641-R8	-24.5615	-176.912	Tofua Arc
SITKAP	SITKAP	Ka'imikai-O-Kanaloa	2006	Sample	Submersible sample	PISCES V	P5-641	P5-641-R9	-24.5615	-176.912	Tofua Arc
SITKAP	SITKAP	Ka'imikai-O-Kanaloa	2006	Sample	Submersible sample	PISCES V	P5-641	P5-641-Sc#3	-24.5659	-176.915	Tofua Arc
SITKAP	SITKAP	Ka'imikai-O-Kanaloa	2006	Sample	Submersible sample	PISCES V	P5-641	P5-641-Sc#5	-24.5633	-176.914	Tofua Arc
SITKAP	SITKAP	Ka'imikai-O-Kanaloa	2006	Observation	Manned submersible	PISCES V Dive	P5-641	P5-641	-24.5662	-176.918	Tofua Arc
SITKAP	SITKAP	Ka'imikai-O-Kanaloa	2006	Sample	Submersible sample	PISCES V	P5-640	P5-640-R1	-24.5962	-176.872	Tofua Arc
SITKAP	SITKAP	Ka'imikai-O-Kanaloa	2006	Sample	Submersible sample	PISCES V	P5-640	P5-640-R10	-24.5854	-176.868	Tofua Arc
SITKAP	SITKAP	Ka'imikai-O-Kanaloa	2006	Sample	Submersible sample	PISCES V	P5-640	P5-640-R11	-24.5846	-176.866	Tofua Arc
SITKAP	SITKAP	Ka'imikai-O-Kanaloa	2006	Sample	Submersible sample	PISCES V	P5-640	P5-640-R12	-24.5962	-176.873	Tofua Arc
SITKAP	SITKAP	Ka'imikai-O-Kanaloa	2006	Sample	Submersible sample	PISCES V	P5-640	P5-640-R2	-24.5976	-176.874	Tofua Arc
SITKAP	SITKAP	Ka'imikai-O-Kanaloa	2006	Sample	Submersible sample	PISCES V	P5-640	P5-640-R3	-24.5972	-176.874	Tofua Arc
SITKAP	SITKAP	Ka'imikai-O-Kanaloa	2006	Sample	Submersible sample	PISCES V	P5-640	P5-640-R4	-24.5972	-176.874	Tofua Arc
SITKAP	SITKAP	Ka'imikai-O-Kanaloa	2006	Sample	Submersible sample	PISCES V	P5-640	P5-640-R5	-24.5971	-176.875	Tofua Arc
SITKAP	SITKAP	Ka'imikai-O-Kanaloa	2006	Sample	Submersible sample	PISCES V	P5-640	P5-640-R6	-24.5906	-176.88	Tofua Arc
SITKAP	SITKAP	Ka'imikai-O-Kanaloa	2006	Sample	Submersible sample	PISCES V	P5-640	P5-640-R7	-24.5892	-176.873	Tofua Arc
SITKAP	SITKAP	Ka'imikai-O-Kanaloa	2006	Sample	Submersible sample	PISCES V	P5-640	P5-640-R8	-24.5848	-176.866	Tofua Arc
SITKAP	SITKAP	Ka'imikai-O-Kanaloa	2006	Sample	Submersible sample	PISCES V	P5-640	P5-640-R9	-24.5871	-176.871	Tofua Arc
SITKAP	SITKAP	Ka'imikai-O-Kanaloa	2006	Sample	Submersible sample	PISCES V	P5-640	P5-640-Sc#3	-24.5971	-176.875	Tofua Arc
SITKAP	SITKAP	Ka'imikai-O-Kanaloa	2006	Sample	Submersible sample	PISCES V	P5-640	P5-640-Sc#4	-24.586	-176.869	Tofua Arc
SITKAP	SITKAP	Ka'imikai-O-Kanaloa	2006	Observation	Manned submersible	PISCES V Dive	P5-640	P5-640	-24.5962	-176.871	Tofua Arc
SITKAP	SITKAP	Ka'imikai-O-Kanaloa	2006	Sample	Submersible sample	PISCES IV	P4-141	P4-141-A1 to A5	-21.1557	-175.744	Tofua Arc
SITKAP	SITKAP	Ka'imikai-O-Kanaloa	2006	Sample	Submersible sample	PISCES IV	P4-141	P4-141-A10	-21.1557	-175.744	Tofua Arc
SITKAP	SITKAP	Ka'imikai-O-Kanaloa	2006	Sample	Submersible sample	PISCES IV	P4-141	P4-141-A6	-21.1557	-175.744	Tofua Arc
SITKAP	SITKAP	Ka'imikai-O-Kanaloa	2006	Sample	Submersible sample	PISCES IV	P4-141	P4-141-A7	-21.1557	-175.744	Tofua Arc
SITKAP	SITKAP	Ka'imikai-O-Kanaloa	2006	Sample	Submersible sample	PISCES IV	P4-141	P4-141-A8	-21.1549	-175.744	Tofua Arc
SITKAP	SITKAP	Ka'imikai-O-Kanaloa	2006	Sample	Submersible sample	PISCES IV	P4-141	P4-141-A9	-21.1557	-175.744	Tofua Arc
SITKAP	SITKAP	Ka'imikai-O-Kanaloa	2006	Sample	Submersible sample	PISCES IV	P4-141	P4-141-R1	-21.1557	-175.744	Tofua Arc
SITKAP	SITKAP	Ka'imikai-O-Kanaloa	2006	Sample	Submersible sample	PISCES IV	P4-141	P4-141-R2	-21.1553	-175.744	Tofua Arc
SITKAP	SITKAP	Ka'imikai-O-Kanaloa	2006	Sample	Submersible sample	PISCES IV	P4-141	P4-141-R3	-21.1545	-175.745	Tofua Arc
SITKAP	SITKAP	Ka'imikai-O-Kanaloa	2006	Sample	Submersible sample	PISCES IV	P4-141	P4-141-R4	-21.1545	-175.745	Tofua Arc
SITKAP	SITKAP	Ka'imikai-O-Kanaloa	2006	Sample	Submersible sample	PISCES IV	P4-141	P4-141-Sc#4	-21.1545	-175.745	Tofua Arc
SITKAP	SITKAP	Ka'imikai-O-Kanaloa	2006	Sample	Submersible sample	PISCES IV	P4-141	P4-141-Sc#5	-21.1549	-175.744	Tofua Arc
SITKAP	SITKAP	Ka'imikai-O-Kanaloa	2006	Observation	Manned submersible	PISCES IV Dive	P4-141	P4-141	-21.156	-175.742	Tofua Arc
SITKAP	SITKAP	Ka'imikai-O-Kanaloa	2006	Observation	ROV observation	ROV RCV-150	RCV-315	RCV-315	-21.16	-175.74	Tofua Arc
SITKAP	SITKAP	Ka'imikai-O-Kanaloa	2006	Observation	ROV observation	ROV RCV-150	RCV-316	RCV-316	-21.16	-175.74	Tofua Arc
SITKAP	SITKAP	Ka'imikai-O-Kanaloa	2006	Observation	ROV observation	ROV RCV-150	RCV-317	RCV-317	-21.16	-175.74	Tofua Arc
SITKAP	SITKAP	Ka'imikai-O-Kanaloa	2006	Observation	ROV observation	ROV RCV-150	RCV-318	RCV-318	-21.16	-175.74	Tofua Arc
SITKAP	SITKAP	Ka'imikai-O-Kanaloa	2006	Observation	ROV observation	ROV RCV-150	RCV-319	RCV-319	-21.16	-175.74	Tofua Arc
SITKAP	SITKAP	Ka'imikai-O-Kanaloa	2006	Sample	Submersible sample	PISCES IV	P4-142	P4-142-A1	-21.1549	-175.744	Tofua Arc
SITKAP	SITKAP	Ka'imikai-O-Kanaloa	2006	Sample	Submersible sample	PISCES IV	P4-142	P4-142-A2	-21.1549	-175.744	Tofua Arc
SITKAP	SITKAP	Ka'imikai-O-Kanaloa	2006	Sample	Submersible sample	PISCES IV	P4-142	P4-142-A3 to A9	-21.1549	-175.744	Tofua Arc
SITKAP	SITKAP	Ka'imikai-O-Kanaloa	2006	Sample	Submersible sample	PISCES IV	P4-142	P4-142-R1	-21.1524	-175.725	Tofua Arc
SITKAP	SITKAP	Ka'imikai-O-Kanaloa	2006	Sample	Submersible sample	PISCES IV	P4-142	P4-142-R2	-21.153	-175.733	Tofua Arc
SITKAP	SITKAP	Ka'imikai-O-Kanaloa	2006	Sample	Submersible sample	PISCES IV	P4-142	P4-142-R3	-21.1549	-175.744	Tofua Arc
SITKAP	SITKAP	Ka'imikai-O-Kanaloa	2006	Sample	Submersible sample	PISCES IV	P4-142	P4-142-R4	-21.1542	-175.745	Tofua Arc
SITKAP	SITKAP	Ka'imikai-O-Kanaloa	2006	Sample	Submersible sample	PISCES IV	P4-142	P4-142-Sc#2	-21.1596	-175.745	Tofua Arc
SITKAP	SITKAP	Ka'imikai-O-Kanaloa	2006	Sample	Submersible sample	PISCES IV	P4-142	P4-142-Sc#3	-21.1549	-175.744	Tofua Arc
SITKAP	SITKAP	Ka'imikai-O-Kanaloa	2006	Sample	Submersible sample	PISCES IV	P4-142	P4-142-Sc#4	-21.1549	-175.744	Tofua Arc
SITKAP	SITKAP	Ka'imikai-O-Kanaloa	2006	Observation	Manned submersible	PISCES IV Dive	P4-142	P4-142	-21.1522	-175.725	Tofua Arc
SITKAP	SITKAP	Ka'imikai-O-Kanaloa	2006	Sample	Submersible sample	PISCES IV	P4-143	P4-143-R10	-21.1268	-175.727	Tofua Arc
SITKAP	SITKAP	Ka'imikai-O-Kanaloa	2006	Sample	Submersible sample	PISCES IV	P4-143	P4-143-R11	-21.1267	-175.727	Tofua Arc
SITKAP	SITKAP	Ka'imikai-O-Kanaloa	2006	Sample	Submersible sample	PISCES IV	P4-143	P4-143-R1-1	-21.1227	-175.73	Tofua Arc
SITKAP	SITKAP	Ka'imikai-O-Kanaloa	2006	Sample	Submersible sample	PISCES IV	P4-143	P4-143-R12	-21.1287	-175.725	Tofua Arc
SITKAP	SITKAP	Ka'imikai-O-Kanaloa	2006	Sample	Submersible sample	PISCES IV	P4-143	P4-143-R1-2	-21.1227	-175.73	Tofua Arc
SITKAP	SITKAP	Ka'imikai-O-Kanaloa	2006	Sample	Submersible sample	PISCES IV	P4-143	P4-143-R13	-21.128	-175.726	Tofua Arc
SITKAP	SITKAP	Ka'imikai-O-Kanaloa	2006	Sample	Submersible sample	PISCES IV	P4-143	P4-143-R1-3	-21.1227	-175.73	Tofua Arc
SITKAP	SITKAP	Ka'imikai-O-Kanaloa	2006	Sample	Submersible sample	PISCES IV	P4-143	P4-143-R14	-21.1264	-175.726	Tofua Arc
SITKAP	SITKAP	Ka'imikai-O-Kanaloa	2006	Sample	Submersible sample	PISCES IV	P4-143	P4-143-R1-4	-21.1225	-175.73	Tofua Arc
SITKAP	SITKAP	Ka'imikai-O-Kanaloa	2006	Sample	Submersible sample	PISCES IV	P4-143	P4-143-R15	-21.1308	-175.726	Tofua Arc
SITKAP	SITKAP	Ka'imikai-O-Kanaloa	2006	Sample	Submersible sample	PISCES IV	P4-143	P4-143-R1-5	-21.1227	-175.73	Tofua Arc
SITKAP	SITKAP	Ka'imikai-O-Kanaloa	2006	Sample	Submersible sample	PISCES IV	P4-143	P4-143-R16	-21.1314	-175.726	Tofua Arc
SITKAP	SITKAP	Ka'imikai-O-Kanaloa	2006	Sample	Submersible sample	PISCES IV	P4-143	P4-143-R1-6	-21.1227	-175.73	Tofua Arc
SITKAP	SITKAP	Ka'imikai-O-Kanaloa	2006	Sample	Submersible sample	PISCES IV	P4-143	P4-143-R17	-21.1363	-175.723	Tofua Arc
SITKAP	SITKAP	Ka'imikai-O-Kanaloa	2006	Sample	Submersible sample	PISCES IV	P4-143	P4-143-R18	-21.1374	-175.722	Tofua Arc
SITKAP	SITKAP	Ka'imikai-O-Kanaloa	2006	Sample	Submersible sample	PISCES IV	P4-143	P4-143-R2	-21.1311	-175.726	Tofua Arc
SITKAP	SITKAP	Ka'imikai-O-Kanaloa	2006	Sample	Submersible sample	PISCES IV	P4-143	P4-143-R3	-21.1302	-175.727	Tofua Arc
SITKAP	SITKAP	Ka'imikai-O-Kanaloa	2006	Sample	Submersible sample	PISCES IV	P4-143	P4-143-R4	-21.1302	-175.726	Tofua Arc
SITKAP	SITKAP	Ka'imikai-O-Kanaloa	2006	Sample	Submersible sample	PISCES IV	P4-143	P4-143-R5	-21.13	-175.726	Tofua Arc
SITKAP	SITKAP	Ka'imikai-O-Kanaloa	2006	Sample	Submersible sample	PISCES IV	P4-143	P4-143-R6	-21.1302	-175.726	Tofua Arc
SITKAP	SITKAP	Ka'imikai-O-Kanaloa	2006	Sample	Submersible sample	PISCES IV	P4-143	P4-143-R7	-21.13	-175.726	Tofua Arc
SITKAP	SITKAP	Ka'imikai-O-Kanaloa	2006	Sample	Submersible sample	PISCES IV	P4-143	P4-143-R8	-21.13	-175.726	Tofua Arc
SITKAP	SITKAP	Ka'imikai-O-Kanaloa	2006	Sample	Submersible sample	PISCES IV	P4-143	P4-143-R9	-21.13	-175.726	Tofua Arc
SITKAP	SITKAP	Ka'imikai-O-Kanaloa	2006	Observation	Manned submersible	PISCES IV Dive	P4-143	P4-143	-21.1323	-175.73	Tofua Arc
SITKAP	SITKAP	Ka'imikai-O-Kanaloa	2006	Observation	ROV observation	ROV RCV-150	RCV-320	RCV-320	-21.13	-175.73	Tofua Arc
SITKAP	SITKAP	Ka'imikai-O-Kanaloa	2006	Observation	ROV observation	ROV RCV-150	RCV-321	RCV-321	-21.13	-175.73	Tofua Arc
SITKAP	SITKAP	Ka'imikai-O-Kanaloa	2006	Sample	Submersible sample	PISCES IV	P4-139	P4-139-A1	-21.1549	-175.744	Tofua Arc
SITKAP	SITKAP	Ka'imikai-O-Kanaloa	2006	Sample	Submersible sample	PISCES IV	P4-139	P4-139-A2	-21.1549	-175.744	Tofua Arc
SITKAP	SITKAP	Ka'imikai-O-Kanaloa	2006	Sample	Submersible sample	PISCES IV	P4-139	P4-139-A26	-21.1549	-175.744	Tofua Arc
SITKAP	SITKAP	Ka'imikai-O-Kanaloa	2006	Sample	Submersible sample	PISCES IV	P4-139	P4-139-A3	-21.1549	-175.744	Tofua Arc
SITKAP	SITKAP	Ka'imikai-O-Kanaloa	2006	Sample	Submersible sample	PISCES IV	P4-139	P4-139-A4	-21.1549	-175.744	Tofua Arc
SITKAP	SITKAP	Ka'imikai-O-Kanaloa	2006	Sample	Submersible sample	PISCES IV	P4-139	P4-139-A5 to A25	-21.1549	-175.744	Tofua Arc
SITKAP	SITKAP	Ka'imikai-O-Kanaloa	2006	Sample	Submersible sample	PISCES IV	P4-139	P4-139-R1	-21.1496	-175.749	Tofua Arc
SITKAP	SITKAP	Ka'imikai-O-Kanaloa	2006	Sample	Submersible sample	PISCES IV	P4-139	P4-139-R2	-21.1521	-175.743	Tofua Arc
SITKAP	SITKAP	Ka'imikai-O-Kanaloa	2006	Sample	Submersible sample	PISCES IV	P4-139	P4-139-Sc#4	-21.152	-175.745	Tofua Arc
SITKAP	SITKAP	Ka'imikai-O-Kanaloa	2006	Sample	Submersible sample	PISCES IV	P4-139	P4-139-Sc#5	-21.1508	-175.748	Tofua Arc
SITKAP	SITKAP	Ka'imikai-O-Kanaloa	2006	Observation	Manned submersible	PISCES IV Dive	P4-139	P4-139	-21.161	-175.737	Tofua Arc
SITKAP	SITKAP	Ka'imikai-O-Kanaloa	2006	Observation	ROV observation	ROV RCV-150	RCV-314	RCV-314	-21.16	-175.74	Tofua Arc
SO35	BACK-ARC-HYDROTHERMALISM SW-PAC	Sonne	1984	Sample	Dredge	Dredge	65KD	SO35-65KD	-22.0934	-177.03	West Lau Basin
SO35	BACK-ARC-HYDROTHERMALISM SW-PAC	Sonne	1984	Sample	Dredge	Dredge	66KD	SO35-66KD	-22.1042	-176.954	West Lau Basin
SO35	BACK-ARC-HYDROTHERMALISM SW-PAC	Sonne	1984	Sample	Dredge	Dredge	67KD	SO35-67KD	-22.1618	-176.693	East Lau Basin
SO35	BACK-ARC-HYDROTHERMALISM SW-PAC	Sonne	1984	Sample	Dredge	Dredge	68KD	SO35-68KD	-22.1879	-176.59	East Lau Basin
SO35	BACK-ARC-HYDROTHERMALISM SW-PAC	Sonne	1984	Sample	Dredge	Dredge	69KD	SO35-69KD	-22.1972	-176.576	East Lau Basin
SO35	BACK-ARC-HYDROTHERMALISM SW-PAC	Sonne	1984	Observation	Photo sledge	Photo sledge	70FS	SO35-70FS	-22.2726	-176.623	East Lau Basin
SO35	BACK-ARC-HYDROTHERMALISM SW-PAC	Sonne	1984	Sample	Dredge	Dredge	71KD	SO35-71KD	-22.2843	-176.622	East Lau Basin
SO35	BACK-ARC-HYDROTHERMALISM SW-PAC	Sonne	1984	Sample	Dredge	Dredge	72KD	SO35-72KD	-22.256	-176.614	East Lau Basin
SO35	BACK-ARC-HYDROTHERMALISM SW-PAC	Sonne	1984	Sample	Dredge	Dredge	73KD	SO35-73KD	-22.2085	-176.601	East Lau Basin
SO35	BACK-ARC-HYDROTHERMALISM SW-PAC	Sonne	1984	Sample	Dredge	Dredge	74KD	SO35-74KD	-22.1678	-176.601	East Lau Basin
SO35	BACK-ARC-HYDROTHERMALISM SW-PAC	Sonne	1984	Sediment	Sediment core	Gravity core	75SL	SO35-75SL	-22.1902	-176.58	East Lau Basin
SO35	BACK-ARC-HYDROTHERMALISM SW-PAC	Sonne	1984	Sediment	Sediment core	Gravity core	76SL	SO35-76SL	-22.2125	-176.498	East Lau Basin
SO35	BACK-ARC-HYDROTHERMALISM SW-PAC	Sonne	1984	Sample	Dredge	Dredge	77KD	SO35-77KD	-22.2235	-176.608	East Lau Basin
SO35	BACK-ARC-HYDROTHERMALISM SW-PAC	Sonne	1984	Sample	Dredge	Dredge	79KD	SO35-79KD	-22.2405	-176.614	East Lau Basin
SO35	BACK-ARC-HYDROTHERMALISM SW-PAC	Sonne	1984	Sample	Dredge	Dredge	80KD	SO35-80KD	-22.2947	-176.56	East Lau Basin
SO35	BACK-ARC-HYDROTHERMALISM SW-PAC	Sonne	1984	Sample	Dredge	Dredge	81KD	SO35-81KD	-22.2394	-176.611	East Lau Basin
SO35	BACK-ARC-HYDROTHERMALISM SW-PAC	Sonne	1984	Sample	Dredge	Dredge	83KD	SO35-83KD	-22.2457	-176.615	East Lau Basin
SO35	BACK-ARC-HYDROTHERMALISM SW-PAC	Sonne	1984	Sample	Dredge	Dredge	84KD	SO35-84KD	-22.1402	-176.61	East Lau Basin
SO35	BACK-ARC-HYDROTHERMALISM SW-PAC	Sonne	1984	Sediment	Sediment core	Gravity core	85SL	SO35-85SL	-22.1504	-176.485	East Lau Basin
SO35	BACK-ARC-HYDROTHERMALISM SW-PAC	Sonne	1984	Sample	Dredge	Dredge	86KD	SO35-86KD	-22.1796	-176.443	East Lau Basin
SO35	BACK-ARC-HYDROTHERMALISM SW-PAC	Sonne	1984	Sample	Dredge	Dredge	87KD	SO35-87KD	-22.1791	-176.553	East Lau Basin
SO35	BACK-ARC-HYDROTHERMALISM SW-PAC	Sonne	1984	Sediment	Sediment core	Gravity core	88SL	SO35-88SL	-22.2399	-176.496	East Lau Basin
SO35	BACK-ARC-HYDROTHERMALISM SW-PAC	Sonne	1984	Sediment	Sediment core	Gravity core	89SL	SO35-89SL	-22.3619	-176.546	East Lau Basin
SO35	BACK-ARC-HYDROTHERMALISM SW-PAC	Sonne	1984	Sample	Dredge	Dredge	90KD	SO35-90KD	-22.3249	-176.656	East Lau Basin
SO35	BACK-ARC-HYDROTHERMALISM SW-PAC	Sonne	1984	Sample	Dredge	Dredge	91KD	SO35-91KD	-22.3419	-176.656	East Lau Basin
SO35	BACK-ARC-HYDROTHERMALISM SW-PAC	Sonne	1984	Sample	Dredge	Dredge	92KD	SO35-92KD	-22.3737	-176.673	East Lau Basin
SO35	BACK-ARC-HYDROTHERMALISM SW-PAC	Sonne	1984	Sample	Dredge	Dredge	93KD	SO35-93KD	-22.3473	-176.664	East Lau Basin
SO35	BACK-ARC-HYDROTHERMALISM SW-PAC	Sonne	1984	Sample	Dredge	Dredge	94KD	SO35-94KD	-22.3892	-176.68	East Lau Basin
SO35	BACK-ARC-HYDROTHERMALISM SW-PAC	Sonne	1984	Sediment	Sediment core	Gravity core	95SL	SO35-95SL	-22.4178	-176.507	East Lau Basin
SO35	BACK-ARC-HYDROTHERMALISM SW-PAC	Sonne	1984	Sediment	Sediment core	Gravity core	96SL	SO35-96SL	-22.5677	-176.63	East Lau Basin
SO35	BACK-ARC-HYDROTHERMALISM SW-PAC	Sonne	1984	Sample	Dredge	Dredge	97KD	SO35-97KD	-22.5347	-176.711	East Lau Basin
SO35	BACK-ARC-HYDROTHERMALISM SW-PAC	Sonne	1984	Sample	Dredge	Dredge	98KD	SO35-98KD	-22.5364	-176.773	East Lau Basin
SO35	BACK-ARC-HYDROTHERMALISM SW-PAC	Sonne	1984	Sediment	Sediment core	Piston core	99KL	SO35-99KL	-22.4069	-176.423	East Lau Basin
SO35	BACK-ARC-HYDROTHERMALISM SW-PAC	Sonne	1984	Sediment	Sediment core	Piston core	100KL	SO35-100KL	-22.4696	-177.22	West Lau Basin
SO35	BACK-ARC-HYDROTHERMALISM SW-PAC	Sonne	1984	Sediment	Sediment core	Piston core	101KL	SO35-101KL	-22.4491	-177.329	West Lau Basin
SO35	BACK-ARC-HYDROTHERMALISM SW-PAC	Sonne	1984	Sediment	Sediment core	Piston core	102KL	SO35-102KL	-22.4044	-177.45	West Lau Basin
SO35	BACK-ARC-HYDROTHERMALISM SW-PAC	Sonne	1984	Sediment	Sediment core	Piston core	103KL	SO35-103KL	-22.3547	-177.438	West Lau Basin
SO35	BACK-ARC-HYDROTHERMALISM SW-PAC	Sonne	1984	Sediment	Sediment core	Freefall core	104BL	SO35-104BL	-22.3203	-177.439	West Lau Basin
SO35	BACK-ARC-HYDROTHERMALISM SW-PAC	Sonne	1984	Sediment	Sediment core	Freefall core	105BL	SO35-105BL	-22.3178	-177.439	West Lau Basin
SO35	BACK-ARC-HYDROTHERMALISM SW-PAC	Sonne	1984	Sediment	Sediment core	Freefall core	106BL	SO35-106BL	-22.3074	-177.431	West Lau Basin
SO35	BACK-ARC-HYDROTHERMALISM SW-PAC	Sonne	1984	Sediment	Sediment core	Freefall core	107BL	SO35-107BL	-22.3012	-177.431	West Lau Basin
SO35	BACK-ARC-HYDROTHERMALISM SW-PAC	Sonne	1984	Sediment	Sediment core	Piston core	108KL	SO35-108KL	-22.2896	-177.413	West Lau Basin
SO35	BACK-ARC-HYDROTHERMALISM SW-PAC	Sonne	1984	Sediment	Sediment core	Piston core	110KL	SO35-110KL	-22.2625	-177.344	West Lau Basin
SO35	BACK-ARC-HYDROTHERMALISM SW-PAC	Sonne	1984	Sample	Dredge	Dredge	111KD	SO35-111KD	-22.3049	-177.23	West Lau Basin
SO35	BACK-ARC-HYDROTHERMALISM SW-PAC	Sonne	1984	Sediment	Sediment core	Piston core	112KL	SO35-112KL	-22.3454	-177.086	West Lau Basin
SO35	BACK-ARC-HYDROTHERMALISM SW-PAC	Sonne	1984	Sediment	Sediment core	Piston core	113KL	SO35-113KL	-22.2711	-177.028	West Lau Basin
SO35	BACK-ARC-HYDROTHERMALISM SW-PAC	Sonne	1984	Sample	Dredge	Dredge	114KD	SO35-114KD	-22.1976	-177.104	West Lau Basin
SO35	BACK-ARC-HYDROTHERMALISM SW-PAC	Sonne	1984	Sediment	Sediment core	Piston core	115KL	SO35-115KL	-22.2391	-177.182	West Lau Basin
SO35	BACK-ARC-HYDROTHERMALISM SW-PAC	Sonne	1984	Sample	Dredge	Dredge	116KD	SO35-116KD	-22.1798	-177.218	West Lau Basin
SO35	BACK-ARC-HYDROTHERMALISM SW-PAC	Sonne	1984	Sediment	Sediment core	Piston core	117KL	SO35-117KL	-22.1401	-177.361	West Lau Basin
SO35	BACK-ARC-HYDROTHERMALISM SW-PAC	Sonne	1984	Sample	Dredge	Dredge	118KD	SO35-118KD	-22.1012	-177.227	West Lau Basin
SO35	BACK-ARC-HYDROTHERMALISM SW-PAC	Sonne	1984	Sediment	Sediment core	Piston core	119KL	SO35-119KL	-22.0074	-177.294	West Lau Basin
SO35	BACK-ARC-HYDROTHERMALISM SW-PAC	Sonne	1984	Sediment	Sediment core	Piston core	120KL	SO35-120KL	-22.0068	-177.119	West Lau Basin
SO35	BACK-ARC-HYDROTHERMALISM SW-PAC	Sonne	1984	Sample	Dredge	Dredge	121KD	SO35-121KD	-22.1279	-177.015	West Lau Basin
SO35	BACK-ARC-HYDROTHERMALISM SW-PAC	Sonne	1984	Sample	Dredge	Dredge	122KD	SO35-122KD	-22.1578	-177.007	West Lau Basin
SO35	BACK-ARC-HYDROTHERMALISM SW-PAC	Sonne	1984	Sample	Dredge	Dredge	123KD	SO35-123KD	-22.2639	-176.871	West Lau Basin
SO35	BACK-ARC-HYDROTHERMALISM SW-PAC	Sonne	1984	Sample	Dredge	Dredge	124KD	SO35-124KD	-22.2895	-176.571	East Lau Basin
SO35	BACK-ARC-HYDROTHERMALISM SW-PAC	Sonne	1984	Observation	Photo sledge	Photo sledge	125FS	SO35-125FS	-22.2906	-176.568	East Lau Basin
SO35	BACK-ARC-HYDROTHERMALISM SW-PAC	Sonne	1984	Observation	Photo sledge	Photo sledge	126FS	SO35-126FS	-22.2547	-176.611	East Lau Basin
SO35	BACK-ARC-HYDROTHERMALISM SW-PAC	Sonne	1984	Sample	Dredge	Dredge	127KD	SO35-127KD	-22.2407	-176.615	East Lau Basin
SO35	BACK-ARC-HYDROTHERMALISM SW-PAC	Sonne	1984	Sample	Dredge	Dredge	128KD	SO35-128KD	-22.2899	-176.567	East Lau Basin
SO35	BACK-ARC-HYDROTHERMALISM SW-PAC	Sonne	1984	Observation	Photo sledge	Photo sledge	1FS	SO35-1FS	-18.5588	-176.379	Central Lau Basin
SO35	BACK-ARC-HYDROTHERMALISM SW-PAC	Sonne	1984	Sample	Dredge	Dredge	2KD	SO35-2KD	-18.5725	-176.39	Central Lau Basin
SO35	BACK-ARC-HYDROTHERMALISM SW-PAC	Sonne	1984	Sample	Dredge	Dredge	3KD	SO35-3KD	-18.5749	-176.322	Central Lau Basin
SO35	BACK-ARC-HYDROTHERMALISM SW-PAC	Sonne	1984	Observation	Photo sledge	Photo sledge	4FS	SO35-4FS	-18.5625	-176.306	Central Lau Basin
SO35	BACK-ARC-HYDROTHERMALISM SW-PAC	Sonne	1984	Sample	Dredge	Dredge	5KD	SO35-5KD	-18.588	-176.263	East Lau Basin
SO35	BACK-ARC-HYDROTHERMALISM SW-PAC	Sonne	1984	Observation	Photo sledge	Photo sledge	6FS	SO35-6FS	-18.5947	-176.258	East Lau Basin
SO35	BACK-ARC-HYDROTHERMALISM SW-PAC	Sonne	1984	Observation	Photo sledge	Photo sledge	7FS	SO35-7FS	-18.6627	-176.485	Central Lau Basin
SO35	BACK-ARC-HYDROTHERMALISM SW-PAC	Sonne	1984	Sample	Dredge	Dredge	8KD	SO35-8KD	-18.674	-176.474	Central Lau Basin
SO35	BACK-ARC-HYDROTHERMALISM SW-PAC	Sonne	1984	Sample	Dredge	Dredge	9KD	SO35-9KD	-18.6639	-176.446	Central Lau Basin
SO35	BACK-ARC-HYDROTHERMALISM SW-PAC	Sonne	1984	Sample	Dredge	Dredge	10KD	SO35-10KD	-18.6738	-176.372	Central Lau Basin
SO35	BACK-ARC-HYDROTHERMALISM SW-PAC	Sonne	1984	Sample	Dredge	Dredge	11KD	SO35-11KD	-18.6658	-176.281	East Lau Basin
SO35	BACK-ARC-HYDROTHERMALISM SW-PAC	Sonne	1984	Sample	Dredge	Dredge	12KD	SO35-12KD	-18.6443	-176.236	East Lau Basin
SO35	BACK-ARC-HYDROTHERMALISM SW-PAC	Sonne	1984	Sample	Dredge	Dredge	13KD	SO35-13KD	-18.651	-176.057	East Lau Basin
SO35	BACK-ARC-HYDROTHERMALISM SW-PAC	Sonne	1984	Sediment	Sediment core	Box grab	14KA	SO35-14KA	-18.6265	-176.098	East Lau Basin
SO35	BACK-ARC-HYDROTHERMALISM SW-PAC	Sonne	1984	Sediment	Sediment core	Piston core	15KL	SO35-15KL	-18.626	-176.1	East Lau Basin
SO35	BACK-ARC-HYDROTHERMALISM SW-PAC	Sonne	1984	Sediment	Sediment core	Piston core	16KL	SO35-16KL	-18.6111	-176.122	East Lau Basin
SO35	BACK-ARC-HYDROTHERMALISM SW-PAC	Sonne	1984	Sample	Dredge	Dredge	17KD	SO35-17KD	-18.5699	-175.894	East Lau Basin
SO35	BACK-ARC-HYDROTHERMALISM SW-PAC	Sonne	1984	Sediment	Sediment core	Piston core	18KL	SO35-18KL	-18.5725	-175.945	East Lau Basin
SO35	BACK-ARC-HYDROTHERMALISM SW-PAC	Sonne	1984	Sediment	Sediment core	Freefall core	20BL	SO35-20BL	-18.5717	-175.939	East Lau Basin
SO35	BACK-ARC-HYDROTHERMALISM SW-PAC	Sonne	1984	Sediment	Sediment core	Freefall core	21BL	SO35-21BL	-18.5728	-175.948	East Lau Basin
SO35	BACK-ARC-HYDROTHERMALISM SW-PAC	Sonne	1984	Sediment	Sediment core	Piston core	22KL	SO35-22KL	-18.5816	-175.69	East Lau Basin
SO35	BACK-ARC-HYDROTHERMALISM SW-PAC	Sonne	1984	Sediment	Sediment core	Freefall core	23BL	SO35-23BL	-18.6231	-175.655	East Lau Basin
SO35	BACK-ARC-HYDROTHERMALISM SW-PAC	Sonne	1984	Sediment	Sediment core	Freefall core	24BL	SO35-24BL	-18.6181	-175.645	East Lau Basin
SO35	BACK-ARC-HYDROTHERMALISM SW-PAC	Sonne	1984	Sample	Dredge	Dredge	25KD	SO35-25KD	-18.7113	-175.731	East Lau Basin
SO35	BACK-ARC-HYDROTHERMALISM SW-PAC	Sonne	1984	Sample	Dredge	Dredge	26KD	SO35-26KD	-18.7492	-175.689	East Lau Basin
SO35	BACK-ARC-HYDROTHERMALISM SW-PAC	Sonne	1984	Sample	Dredge	Dredge	27KD	SO35-27KD	-18.7529	-175.743	East Lau Basin
SO35	BACK-ARC-HYDROTHERMALISM SW-PAC	Sonne	1984	Sample	Dredge	Dredge	28KD	SO35-28KD	-18.7872	-175.756	East Lau Basin
SO35	BACK-ARC-HYDROTHERMALISM SW-PAC	Sonne	1984	Sample	Dredge	Dredge	29KD	SO35-29KD	-18.7941	-175.715	East Lau Basin
SO35	BACK-ARC-HYDROTHERMALISM SW-PAC	Sonne	1984	Sediment	Sediment core	Gravity core	30SL	SO35-30SL	-18.7561	-175.723	East Lau Basin
SO35	BACK-ARC-HYDROTHERMALISM SW-PAC	Sonne	1984	Sediment	Sediment core	Gravity core	31SL	SO35-31SL	-18.7598	-175.752	East Lau Basin
SO35	BACK-ARC-HYDROTHERMALISM SW-PAC	Sonne	1984	Sediment	Sediment core	Freefall core	32BL	SO35-32BL	-18.7611	-175.758	East Lau Basin
SO35	BACK-ARC-HYDROTHERMALISM SW-PAC	Sonne	1984	Sample	Dredge	Dredge	33KD	SO35-33KD	-18.8095	-175.835	East Lau Basin
SO35	BACK-ARC-HYDROTHERMALISM SW-PAC	Sonne	1984	Sediment	Sediment core	Piston core	34KL	SO35-34KL	-18.7699	-175.821	East Lau Basin
SO35	BACK-ARC-HYDROTHERMALISM SW-PAC	Sonne	1984	Sample	Dredge	Dredge	35KD	SO35-35KD	-18.7575	-175.874	East Lau Basin
SO35	BACK-ARC-HYDROTHERMALISM SW-PAC	Sonne	1984	Sediment	Sediment core	Piston core	36KL	SO35-36KL	-18.777	-175.847	East Lau Basin
SO35	BACK-ARC-HYDROTHERMALISM SW-PAC	Sonne	1984	Sample	Dredge	Dredge	38KD	SO35-38KD	-18.7737	-175.904	East Lau Basin
SO35	BACK-ARC-HYDROTHERMALISM SW-PAC	Sonne	1984	Sediment	Sediment core	Piston core	39KL	SO35-39KL	-18.7917	-175.893	East Lau Basin
SO35	BACK-ARC-HYDROTHERMALISM SW-PAC	Sonne	1984	Sediment	Sediment core	Piston core	40KL	SO35-40KL	-18.793	-175.83	East Lau Basin
SO35	BACK-ARC-HYDROTHERMALISM SW-PAC	Sonne	1984	Sediment	Sediment core	Piston core	41KL	SO35-41KL	-18.8138	-175.87	East Lau Basin
SO35	BACK-ARC-HYDROTHERMALISM SW-PAC	Sonne	1984	Sample	Dredge	Dredge	42KD	SO35-42KD	-18.7536	-175.897	East Lau Basin
SO35	BACK-ARC-HYDROTHERMALISM SW-PAC	Sonne	1984	Sample	Dredge	Dredge	43KD	SO35-43KD	-18.7639	-175.913	East Lau Basin
SO35	BACK-ARC-HYDROTHERMALISM SW-PAC	Sonne	1984	Sediment	Sediment core	Freefall core	44BL	SO35-44BL	-18.8101	-175.032	Tofua Arc
SO35	BACK-ARC-HYDROTHERMALISM SW-PAC	Sonne	1984	Sediment	Sediment core	Freefall core	45BL	SO35-45BL	-18.8063	-176.03	East Lau Basin
SO35	BACK-ARC-HYDROTHERMALISM SW-PAC	Sonne	1984	Sample	Dredge	Dredge	46KD	SO35-46KD	-18.7685	-176.141	East Lau Basin
SO35	BACK-ARC-HYDROTHERMALISM SW-PAC	Sonne	1984	Sediment	Sediment core	Piston core	47KL	SO35-47KL	-18.604	-176.092	East Lau Basin
SO35	BACK-ARC-HYDROTHERMALISM SW-PAC	Sonne	1984	Sample	Dredge	Dredge	49KD	SO35-49KD	-18.7626	-176.401	Central Lau Basin
SO35	BACK-ARC-HYDROTHERMALISM SW-PAC	Sonne	1984	Sample	Dredge	Dredge	50KD	SO35-50KD	-18.7579	-176.408	Central Lau Basin
SO35	BACK-ARC-HYDROTHERMALISM SW-PAC	Sonne	1984	Sample	Dredge	Dredge	51KD	SO35-51KD	-18.82	-176.449	Central Lau Basin
SO35	BACK-ARC-HYDROTHERMALISM SW-PAC	Sonne	1984	Sample	Dredge	Dredge	52KD	SO35-52KD	-18.8146	-176.552	Central Lau Basin
SO35	BACK-ARC-HYDROTHERMALISM SW-PAC	Sonne	1984	Sample	Dredge	Dredge	53KD	SO35-53KD	-18.7997	-176.579	Central Lau Basin
SO35	BACK-ARC-HYDROTHERMALISM SW-PAC	Sonne	1984	Sample	Dredge	Dredge	54KD	SO35-54KD	-18.6312	-176.768	East Lau Basin
SO35	BACK-ARC-HYDROTHERMALISM SW-PAC	Sonne	1984	Sediment	Sediment core	Gravity core	55SL	SO35-55SL	-18.6333	-176.816	East Lau Basin
SO35	BACK-ARC-HYDROTHERMALISM SW-PAC	Sonne	1984	Sample	Dredge	Dredge	56KD	SO35-56KD	-18.6216	-176.887	East Lau Basin
SO35	BACK-ARC-HYDROTHERMALISM SW-PAC	Sonne	1984	Sediment	Sediment core	Gravity core	57SL	SO35-57SL	-18.6169	-176.893	East Lau Basin
SO35	BACK-ARC-HYDROTHERMALISM SW-PAC	Sonne	1984	Sediment	Sediment core	Gravity core	58SL	SO35-58SL	-18.6654	-176.718	East Lau Basin
SO35	BACK-ARC-HYDROTHERMALISM SW-PAC	Sonne	1984	Sediment	Sediment core	Gravity core	59SL	SO35-59SL	-18.6967	-176.706	East Lau Basin
SO35	BACK-ARC-HYDROTHERMALISM SW-PAC	Sonne	1984	Observation	Photo sledge	Photo sledge	60FS	SO35-60FS	-18.8031	-176.551	Central Lau Basin
SO35	BACK-ARC-HYDROTHERMALISM SW-PAC	Sonne	1984	Sample	Dredge	Dredge	61KD	SO35-61KD	-18.8605	-176.557	Central Lau Basin
SO35	BACK-ARC-HYDROTHERMALISM SW-PAC	Sonne	1984	Sample	Dredge	Dredge	62KD	SO35-62KD	-18.8041	-176.547	Central Lau Basin
SO35	BACK-ARC-HYDROTHERMALISM SW-PAC	Sonne	1984	Observation	Photo sledge	Photo sledge	63FS	SO35-63FS	-18.7268	-176.507	Central Lau Basin
SO35	BACK-ARC-HYDROTHERMALISM SW-PAC	Sonne	1984	Sample	Dredge	Dredge	64KD	SO35-64KD	-18.6993	-176.508	Central Lau Basin
SO48	LAU BASIN HYDROTHERMALISM SOPAC	Sonne	1987	Sample	TV grab	TV grab	1GA	SO48_1GA	-15.3717	-174.692	Mangatolu
SO48	LAU BASIN HYDROTHERMALISM SOPAC	Sonne	1987	Observation	Photo sledge	Photo sledge	2FS	SO48_2FS	-15.4	-174.674	Mangatolu
SO48	LAU BASIN HYDROTHERMALISM SOPAC	Sonne	1987	Sample	TV grab	TV grab	3GC	SO48_3GC	-15.3917	-174.686	Mangatolu
SO48	LAU BASIN HYDROTHERMALISM SOPAC	Sonne	1987	Sample	TV grab	TV grab	4GC	SO48_4GC	-15.3917	-174.671	Mangatolu
SO48	LAU BASIN HYDROTHERMALISM SOPAC	Sonne	1987	Sample	TV grab	TV grab	5GC	SO48_5GC	-15.3833	-174.679	Mangatolu
SO48	LAU BASIN HYDROTHERMALISM SOPAC	Sonne	1987	Sample	TV grab	TV grab	6GC	SO48_6GC	-15.39	-174.679	Mangatolu
SO48	LAU BASIN HYDROTHERMALISM SOPAC	Sonne	1987	Sample	TV grab	TV grab	7GC	SO48_7GC	-18.5883	-176.423	Central Lau Basin
SO48	LAU BASIN HYDROTHERMALISM SOPAC	Sonne	1987	Sample	TV grab	TV grab	8GC	SO48_8GC	-18.6033	-176.411	Central Lau Basin
SO48	LAU BASIN HYDROTHERMALISM SOPAC	Sonne	1987	Sample	TV grab	TV grab	10GC	SO48_10GC	-18.6117	-176.427	Central Lau Basin
SO48	LAU BASIN HYDROTHERMALISM SOPAC	Sonne	1987	Sample	TV grab	TV grab	11GA	SO48_11GA	-18.69	-176.424	Central Lau Basin
SO48	LAU BASIN HYDROTHERMALISM SOPAC	Sonne	1987	Sample	TV grab	TV grab	12GA	SO48_12GA	-18.695	-176.491	Central Lau Basin
SO48	LAU BASIN HYDROTHERMALISM SOPAC	Sonne	1987	Sample	Dredge	Dredge	13KD	SO48_13KD	-18.395	-176.583	Central Lau Basin
SO48	LAU BASIN HYDROTHERMALISM SOPAC	Sonne	1987	Sample	Dredge	Dredge	14KD	SO48_14KD	-18.5767	-176.461	Central Lau Basin
SO48	LAU BASIN HYDROTHERMALISM SOPAC	Sonne	1987	Sample	Dredge	Dredge	15KD	SO48_15KD	-18.565	-176.438	Central Lau Basin
SO48	LAU BASIN HYDROTHERMALISM SOPAC	Sonne	1987	Sample	Dredge	Dredge	16KD	SO48_16KD	-18.5883	-176.45	Central Lau Basin
SO48	LAU BASIN HYDROTHERMALISM SOPAC	Sonne	1987	Sample	Dredge	Dredge	17KD	SO48_17KD	-18.6217	-176.462	Central Lau Basin
SO48	LAU BASIN HYDROTHERMALISM SOPAC	Sonne	1987	Sample	TV grab	TV grab	18GA	SO48_18GA	-18.595	-176.445	Central Lau Basin
SO48	LAU BASIN HYDROTHERMALISM SOPAC	Sonne	1987	Sample	Dredge	Dredge	19KD	SO48_19KD	-18.625	-176.507	Central Lau Basin
SO48	LAU BASIN HYDROTHERMALISM SOPAC	Sonne	1987	Sample	Dredge	Dredge	20KD	SO48_20KD	-18.6083	-176.502	Central Lau Basin
SO48	LAU BASIN HYDROTHERMALISM SOPAC	Sonne	1987	Sample	Dredge	Dredge	21KD	SO48_21KD	-18.6083	-176.495	Central Lau Basin
SO48	LAU BASIN HYDROTHERMALISM SOPAC	Sonne	1987	Sample	Dredge	Dredge	22KD	SO48_22KD	-18.63	-176.475	Central Lau Basin
SO48	LAU BASIN HYDROTHERMALISM SOPAC	Sonne	1987	Sample	Dredge	Dredge	23KD	SO48_23KD	-18.6483	-176.465	Central Lau Basin
SO48	LAU BASIN HYDROTHERMALISM SOPAC	Sonne	1987	Sediment	Sediment core	Gravity core	24SL	SO48_24SL	-18.6217	-176.43	Central Lau Basin
SO48	LAU BASIN HYDROTHERMALISM SOPAC	Sonne	1987	Sediment	Sediment core	Gravity core	25SL	SO48_25SL	-18.55	-176.321	Central Lau Basin
SO48	LAU BASIN HYDROTHERMALISM SOPAC	Sonne	1987	Sediment	Sediment core	Gravity core	26SL	SO48_26SL	-18.605	-176.23	East Lau Basin
SO48	LAU BASIN HYDROTHERMALISM SOPAC	Sonne	1987	Sample	Dredge	Dredge	27KD	SO48_27KD	-18.595	-175.904	East Lau Basin
SO48	LAU BASIN HYDROTHERMALISM SOPAC	Sonne	1987	Sample	Dredge	Dredge	28KD	SO48_28KD	-18.6617	-175.868	East Lau Basin
SO48	LAU BASIN HYDROTHERMALISM SOPAC	Sonne	1987	Sample	Dredge	Dredge	29KD	SO48_29KD	-18.735	-175.734	East Lau Basin
SO48	LAU BASIN HYDROTHERMALISM SOPAC	Sonne	1987	Sample	Dredge	Dredge	30KD	SO48_30KD	-18.7183	-175.737	East Lau Basin
SO48	LAU BASIN HYDROTHERMALISM SOPAC	Sonne	1987	Sediment	Sediment core	Piston core	31KL	SO48_31KL	-18.5933	-176.723	East Lau Basin
SO48	LAU BASIN HYDROTHERMALISM SOPAC	Sonne	1987	Sediment	Sediment core	Piston core	32KL	SO48_32KL	-18.595	-176.921	East Lau Basin
SO48	LAU BASIN HYDROTHERMALISM SOPAC	Sonne	1987	Sediment	Sediment core	Piston core	33KL	SO48_33KL	-18.6033	-176.956	East Lau Basin
SO48	LAU BASIN HYDROTHERMALISM SOPAC	Sonne	1987	Sediment	Sediment core	Piston core	34KL	SO48_34KL	-18.61	-177.194	West Lau Basin
SO48	LAU BASIN HYDROTHERMALISM SOPAC	Sonne	1987	Sediment	Sediment core	Piston core	35KL	SO48_35KL	-18.64	-177.405	West Lau Basin
SO48	LAU BASIN HYDROTHERMALISM SOPAC	Sonne	1987	Sample	Dredge	Dredge	36KD	SO48_36KD	-18.5733	-177.478	West Lau Basin
SO48	LAU BASIN HYDROTHERMALISM SOPAC	Sonne	1987	Sediment	Sediment core	Gravity core	37SL	SO48_37SL	-18.5983	-176.631	East Lau Basin
SO48	LAU BASIN HYDROTHERMALISM SOPAC	Sonne	1987	Sediment	Sediment core	Gravity core	38SL	SO48_38SL	-18.56	-176.641	East Lau Basin
SO48	LAU BASIN HYDROTHERMALISM SOPAC	Sonne	1987	Sediment	Sediment core	Gravity core	39SL	SO48_39SL	-18.6283	-176.287	East Lau Basin
SO48	LAU BASIN HYDROTHERMALISM SOPAC	Sonne	1987	Observation	Photo sledge	Photo sledge	40FS	SO48_40FS	-18.6	-176.445	Central Lau Basin
SO48	LAU BASIN HYDROTHERMALISM SOPAC	Sonne	1987	Sample	TV grab	TV grab	41GC	SO48_41GC	-18.6067	-176.409	Central Lau Basin
SO48	LAU BASIN HYDROTHERMALISM SOPAC	Sonne	1987	Sample	TV grab	TV grab	42GC	SO48_42GC	-18.575	-176.428	Central Lau Basin
SO48	LAU BASIN HYDROTHERMALISM SOPAC	Sonne	1987	Sediment	Sediment core	Gravity core	43SL	SO48_43SL	-18.58	-176.268	East Lau Basin
SO48	LAU BASIN HYDROTHERMALISM SOPAC	Sonne	1987	Sediment	Sediment core	Gravity core	44SL	SO48_44SL	-18.7	-176.318	East Lau Basin
SO48	LAU BASIN HYDROTHERMALISM SOPAC	Sonne	1987	Observation	Photo sledge	Photo sledge	45FS	SO48_45FS	-18.57	-176.419	Central Lau Basin
SO48	LAU BASIN HYDROTHERMALISM SOPAC	Sonne	1987	Sample	TV grab	TV grab	46GC	SO48_46GC	-18.735	-176.511	Central Lau Basin
SO48	LAU BASIN HYDROTHERMALISM SOPAC	Sonne	1987	Sample	TV grab	TV grab	47GC	SO48_47GC	-18.7333	-176.521	Central Lau Basin
SO48	LAU BASIN HYDROTHERMALISM SOPAC	Sonne	1987	Sediment	Sediment core	Gravity core	48SL	SO48_48SL	-18.7383	-176.275	East Lau Basin
SO48	LAU BASIN HYDROTHERMALISM SOPAC	Sonne	1987	Observation	Photo sledge	Photo sledge	49FS	SO48_49FS	-18.6733	-176.478	Central Lau Basin
SO48	LAU BASIN HYDROTHERMALISM SOPAC	Sonne	1987	Sample	TV grab	TV grab	50GC	SO48_50GC	-18.7617	-176.536	Central Lau Basin
SO48	LAU BASIN HYDROTHERMALISM SOPAC	Sonne	1987	Sample	TV grab	TV grab	51GC	SO48_51GC	-18.7733	-176.53	Central Lau Basin
SO48	LAU BASIN HYDROTHERMALISM SOPAC	Sonne	1987	Observation	Photo sledge	Photo sledge	52FS	SO48_52FS	-18.7767	-176.527	Central Lau Basin
SO48	LAU BASIN HYDROTHERMALISM SOPAC	Sonne	1987	Sample	TV grab	TV grab	53GC	SO48_53GC	-21.46	-176.374	East Lau Basin
SO48	LAU BASIN HYDROTHERMALISM SOPAC	Sonne	1987	Sample	TV grab	TV grab	54GC	SO48_54GC	-21.4817	-176.38	East Lau Basin
SO48	LAU BASIN HYDROTHERMALISM SOPAC	Sonne	1987	Sample	TV grab	TV grab	55GC	SO48_55GC	-21.4783	-176.38	East Lau Basin
SO48	LAU BASIN HYDROTHERMALISM SOPAC	Sonne	1987	Observation	Photo sledge	Photo sledge	56FS	SO48_56FS	-21.465	-176.378	East Lau Basin
SO48	LAU BASIN HYDROTHERMALISM SOPAC	Sonne	1987	Sample	TV grab	TV grab	57GC	SO48_57GC	-21.88	-176.512	East Lau Basin
SO48	LAU BASIN HYDROTHERMALISM SOPAC	Sonne	1987	Sample	TV grab	TV grab	58GA	SO48_58GA	-21.98	-176.553	East Lau Basin
SO48	LAU BASIN HYDROTHERMALISM SOPAC	Sonne	1987	Observation	Photo sledge	Photo sledge	59FS	SO48_59FS	-22.005	-176.567	East Lau Basin
SO48	LAU BASIN HYDROTHERMALISM SOPAC	Sonne	1987	Sediment	Sediment core	Gravity core	60SL	SO48_60SL	-21.7433	-176.677	West Lau Basin
SO48	LAU BASIN HYDROTHERMALISM SOPAC	Sonne	1987	Sample	TV grab	TV grab	61GC	SO48_61GC	-21.8217	-176.442	East Lau Basin
SO48	LAU BASIN HYDROTHERMALISM SOPAC	Sonne	1987	Observation	Photo sledge	Photo sledge	62FS	SO48_62FS	-21.8567	-176.502	East Lau Basin
SO48	LAU BASIN HYDROTHERMALISM SOPAC	Sonne	1987	Sample	Dredge	Dredge	64KD	SO48_64KD	-21.8533	-176.503	East Lau Basin
SO48	LAU BASIN HYDROTHERMALISM SOPAC	Sonne	1987	Sample	Dredge	Dredge	65KD	SO48_65KD	-21.8183	-176.441	East Lau Basin
SO48	LAU BASIN HYDROTHERMALISM SOPAC	Sonne	1987	Sample	Dredge	Dredge	66KD	SO48_66KD	-21.82	-176.442	East Lau Basin
SO48	LAU BASIN HYDROTHERMALISM SOPAC	Sonne	1987	Sample	Dredge	Dredge	67KD	SO48_67KD	-21.82	-176.436	East Lau Basin
SO48	LAU BASIN HYDROTHERMALISM SOPAC	Sonne	1987	Sample	Dredge	Dredge	68KD	SO48_68KD	-21.9467	-176.542	East Lau Basin
SO48	LAU BASIN HYDROTHERMALISM SOPAC	Sonne	1987	Sample	Dredge	Dredge	69KD	SO48_69KD	-21.9617	-176.554	East Lau Basin
SO48	LAU BASIN HYDROTHERMALISM SOPAC	Sonne	1987	Sample	Dredge	Dredge	70KD	SO48_70KD	-21.9833	-176.56	East Lau Basin
SO48	LAU BASIN HYDROTHERMALISM SOPAC	Sonne	1987	Sample	Dredge	Dredge	71KD	SO48_71KD	-21.8667	-176.508	East Lau Basin
SO48	LAU BASIN HYDROTHERMALISM SOPAC	Sonne	1987	Sample	TV grab	TV grab	72GA	SO48_72GA	-21.8567	-176.5	East Lau Basin
SO48	LAU BASIN HYDROTHERMALISM SOPAC	Sonne	1987	Observation	Photo sledge	Photo sledge	73FS	SO48_73FS	-21.8533	-176.494	East Lau Basin
SO48	LAU BASIN HYDROTHERMALISM SOPAC	Sonne	1987	Sample	TV grab	TV grab	74GA	SO48_74GA	-21.8617	-176.506	East Lau Basin
SO48	LAU BASIN HYDROTHERMALISM SOPAC	Sonne	1987	Sediment	Sediment core	Gravity core	75SL	SO48_75SL	-21.835	-176.615	East Lau Basin
SO48	LAU BASIN HYDROTHERMALISM SOPAC	Sonne	1987	Sediment	Sediment core	Gravity core	76SL	SO48_76SL	-21.805	-176.698	West Lau Basin
SO48	LAU BASIN HYDROTHERMALISM SOPAC	Sonne	1987	Sediment	Sediment core	Gravity core	77SL	SO48_77SL	-21.875	-176.746	West Lau Basin
SO48	LAU BASIN HYDROTHERMALISM SOPAC	Sonne	1987	Sediment	Sediment core	Gravity core	78SL	SO48_78SL	-21.89	-176.462	East Lau Basin
SO48	LAU BASIN HYDROTHERMALISM SOPAC	Sonne	1987	Sample	Dredge	Dredge	79KD	SO48_79KD	-21.9367	-176.536	East Lau Basin
SO48	LAU BASIN HYDROTHERMALISM SOPAC	Sonne	1987	Sample	Dredge	Dredge	80KD	SO48_80KD	-21.8617	-176.496	East Lau Basin
SO48	LAU BASIN HYDROTHERMALISM SOPAC	Sonne	1987	Sample	Dredge	Dredge	81KD	SO48_81KD	-21.8933	-176.514	East Lau Basin
SO48	LAU BASIN HYDROTHERMALISM SOPAC	Sonne	1987	Sample	Dredge	Dredge	82KD	SO48_82KD	-21.8867	-176.513	East Lau Basin
SO48	LAU BASIN HYDROTHERMALISM SOPAC	Sonne	1987	Sample	Dredge	Dredge	83KD	SO48_83KD	-21.8567	-176.496	East Lau Basin
SO48	LAU BASIN HYDROTHERMALISM SOPAC	Sonne	1987	Sample	Dredge	Dredge	84KD	SO48_84KD	-21.9383	-176.54	East Lau Basin
SO48	LAU BASIN HYDROTHERMALISM SOPAC	Sonne	1987	Sample	Dredge	Dredge	85KD	SO48_85KD	-21.8717	-176.512	East Lau Basin
SO48	LAU BASIN HYDROTHERMALISM SOPAC	Sonne	1987	Observation	Photo sledge	Photo sledge	87FS	SO48_87FS	-21.9633	-176.552	East Lau Basin
SO48	LAU BASIN HYDROTHERMALISM SOPAC	Sonne	1987	Sediment	Sediment core	Gravity core	89SL	SO48_89SL	-22.082	-176.553	East Lau Basin
SO48	LAU BASIN HYDROTHERMALISM SOPAC	Sonne	1987	Sediment	Sediment core	Gravity core	90SL	SO48_90SL	-22.0955	-176.483	East Lau Basin
SO48	LAU BASIN HYDROTHERMALISM SOPAC	Sonne	1987	Sediment	Sediment core	Gravity core	91SL	SO48_91SL	-21.9217	-176.444	East Lau Basin
SO48	LAU BASIN HYDROTHERMALISM SOPAC	Sonne	1987	Observation	Photo sledge	Photo sledge	92FS	SO48_92FS	-21.96	-176.549	East Lau Basin
SO48	LAU BASIN HYDROTHERMALISM SOPAC	Sonne	1987	Sample	Dredge	Dredge	93KD	SO48_93KD	-21.99	-176.704	East Lau Basin
SO48	LAU BASIN HYDROTHERMALISM SOPAC	Sonne	1987	Sample	Dredge	Dredge	94KD	SO48_94KD	-21.9733	-176.661	East Lau Basin
SO48	LAU BASIN HYDROTHERMALISM SOPAC	Sonne	1987	Sample	Dredge	Dredge	95KD	SO48_95KD	-21.94	-176.533	East Lau Basin
SO48	LAU BASIN HYDROTHERMALISM SOPAC	Sonne	1987	Sediment	Sediment core	Piston core	96KL	SO48_96KL	-21.8783	-177.4	West Lau Basin
SO48	LAU BASIN HYDROTHERMALISM SOPAC	Sonne	1987	Sediment	Sediment core	Piston core	97KL	SO48_97KL	-21.9167	-177.315	West Lau Basin
SO48	LAU BASIN HYDROTHERMALISM SOPAC	Sonne	1987	Sediment	Sediment core	Piston core	98KL	SO48_98KL	-21.945	-177.196	West Lau Basin
SO48	LAU BASIN HYDROTHERMALISM SOPAC	Sonne	1987	Sediment	Sediment core	Piston core	99KL	SO48_99KL	-21.975	-177.086	West Lau Basin
SO48	LAU BASIN HYDROTHERMALISM SOPAC	Sonne	1987	Sediment	Sediment core	Piston core	100KL	SO48_100KL	-22.0385	-176.873	West Lau Basin
SO48	LAU BASIN HYDROTHERMALISM SOPAC	Sonne	1987	Sediment	Sediment core	Piston core	101KL	SO48_101KL	-22.0557	-176.852	West Lau Basin
SO48	LAU BASIN HYDROTHERMALISM SOPAC	Sonne	1987	Observation	Photo sledge	Photo sledge	102FS	SO48_102FS	-22.2217	-176.608	East Lau Basin
SO48	LAU BASIN HYDROTHERMALISM SOPAC	Sonne	1987	Sample	TV grab	TV grab	103GA	SO48_103GA	-22.27	-176.617	East Lau Basin
SO48	LAU BASIN HYDROTHERMALISM SOPAC	Sonne	1987	Sample	TV grab	TV grab	104GA	SO48_104GA	-22.2533	-176.611	East Lau Basin
SO48	LAU BASIN HYDROTHERMALISM SOPAC	Sonne	1987	Sample	Dredge	Dredge	105KD	SO48_105KD	-22.2483	-176.615	East Lau Basin
SO48	LAU BASIN HYDROTHERMALISM SOPAC	Sonne	1987	Sample	Dredge	Dredge	106KD	SO48_106KD	-22.3067	-176.565	East Lau Basin
SO48	LAU BASIN HYDROTHERMALISM SOPAC	Sonne	1987	Sample	Dredge	Dredge	107KD	SO48_107KD	-22.285	-176.602	East Lau Basin
SO48	LAU BASIN HYDROTHERMALISM SOPAC	Sonne	1987	Observation	Photo sledge	Photo sledge	108FS	SO48_108FS	-22.2933	-176.553	East Lau Basin
SO48	LAU BASIN HYDROTHERMALISM SOPAC	Sonne	1987	Sample	Dredge	Dredge	109KD	SO48_109KD	-22.285	-176.569	East Lau Basin
SO48	LAU BASIN HYDROTHERMALISM SOPAC	Sonne	1987	Sample	Dredge	Dredge	110KD	SO48_110KD	-22.29	-176.569	East Lau Basin
SO48	LAU BASIN HYDROTHERMALISM SOPAC	Sonne	1987	Sample	Dredge	Dredge	111KD	SO48_111KD	-22.2967	-176.559	East Lau Basin
SO48	LAU BASIN HYDROTHERMALISM SOPAC	Sonne	1987	Sample	Dredge	Dredge	112KD	SO48_112KD	-22.295	-176.315	Tofua Arc
SO48	LAU BASIN HYDROTHERMALISM SOPAC	Sonne	1987	Sample	Dredge	Dredge	113KD	SO48_113KD	-22.1883	-176.443	East Lau Basin
SO48	LAU BASIN HYDROTHERMALISM SOPAC	Sonne	1987	Sample	Dredge	Dredge	114KD	SO48_114KD	-22.195	-176.554	East Lau Basin
SO48	LAU BASIN HYDROTHERMALISM SOPAC	Sonne	1987	Observation	Photo sledge	Photo sledge	115FS	SO48_115FS	-22.1783	-176.624	East Lau Basin
SO48	LAU BASIN HYDROTHERMALISM SOPAC	Sonne	1987	Sample	TV grab	TV grab	116GA	SO48_116GA	-22.2083	-176.611	East Lau Basin
SO48	LAU BASIN HYDROTHERMALISM SOPAC	Sonne	1987	Sample	TV grab	TV grab	117GA	SO48_117GA	-22.2333	-176.612	East Lau Basin
SO48	LAU BASIN HYDROTHERMALISM SOPAC	Sonne	1987	Sample	Dredge	Dredge	118KD	SO48_118KD	-22.175	-176.68	East Lau Basin
SO48	LAU BASIN HYDROTHERMALISM SOPAC	Sonne	1987	Sample	Dredge	Dredge	119KD	SO48_119KD	-22.1933	-176.8	West Lau Basin
SO48	LAU BASIN HYDROTHERMALISM SOPAC	Sonne	1987	Sample	Dredge	Dredge	120KD	SO48_120KD	-22.235	-176.83	West Lau Basin
SO48	LAU BASIN HYDROTHERMALISM SOPAC	Sonne	1987	Observation	Photo sledge	Photo sledge	121FS	SO48_121FS	-22.355	-176.655	East Lau Basin
SO48	LAU BASIN HYDROTHERMALISM SOPAC	Sonne	1987	Sample	TV grab	TV grab	122GA	SO48_122GA	-22.2583	-176.617	East Lau Basin
SO48	LAU BASIN HYDROTHERMALISM SOPAC	Sonne	1987	Sample	TV grab	TV grab	123GA	SO48_123GA	-22.5383	-176.713	East Lau Basin
SO48	LAU BASIN HYDROTHERMALISM SOPAC	Sonne	1987	Sample	TV grab	TV grab	124GA	SO48_124GA	-22.545	-176.718	East Lau Basin
SO48	LAU BASIN HYDROTHERMALISM SOPAC	Sonne	1987	Observation	Photo sledge	Photo sledge	125FS	SO48_125FS	-22.5333	-176.713	East Lau Basin
SO48	LAU BASIN HYDROTHERMALISM SOPAC	Sonne	1987	Sample	Dredge	Dredge	126KD	SO48_126KD	-22.595	-176.73	East Lau Basin
SO48	LAU BASIN HYDROTHERMALISM SOPAC	Sonne	1987	Sample	Dredge	Dredge	127KD	SO48_127KD	-22.68	-176.738	East Lau Basin
SO48	LAU BASIN HYDROTHERMALISM SOPAC	Sonne	1987	Sample	TV grab	TV grab	128GA	SO48_128GA	-22.6633	-176.732	East Lau Basin
SO48	LAU BASIN HYDROTHERMALISM SOPAC	Sonne	1987	Sample	TV grab	TV grab	129GA	SO48_129GA	-22.5967	-176.737	East Lau Basin
SO48	LAU BASIN HYDROTHERMALISM SOPAC	Sonne	1987	Sample	TV grab	TV grab	130GA	SO48_130GA	-22.5533	-176.719	East Lau Basin
SO48	LAU BASIN HYDROTHERMALISM SOPAC	Sonne	1987	Sample	TV grab	TV grab	131GA	SO48_131GA	-22.5517	-176.721	East Lau Basin
SO48	LAU BASIN HYDROTHERMALISM SOPAC	Sonne	1987	Observation	Photo sledge	Photo sledge	132FS	SO48_132FS	-22.5267	-176.713	East Lau Basin
SO48	LAU BASIN HYDROTHERMALISM SOPAC	Sonne	1987	Sample	TV grab	TV grab	133GA	SO48_133GA	-22.1783	-176.617	East Lau Basin
SO48	LAU BASIN HYDROTHERMALISM SOPAC	Sonne	1987	Sample	TV grab	TV grab	135GA	SO48_135GA	-22.3283	-176.66	East Lau Basin
SO48	LAU BASIN HYDROTHERMALISM SOPAC	Sonne	1987	Sample	Dredge	Dredge	136KD	SO48_136KD	-22.415	-176.69	East Lau Basin
SO48	LAU BASIN HYDROTHERMALISM SOPAC	Sonne	1987	Sample	Dredge	Dredge	137KD	SO48_137KD	-22.5167	-176.704	East Lau Basin
SO48	LAU BASIN HYDROTHERMALISM SOPAC	Sonne	1987	Sample	Dredge	Dredge	138KD	SO48_138KD	-22.5617	-176.728	East Lau Basin
SO48	LAU BASIN HYDROTHERMALISM SOPAC	Sonne	1987	Observation	Photo sledge	Photo sledge	139FS	SO48_139FS	-22.54	-176.715	East Lau Basin
SO48	LAU BASIN HYDROTHERMALISM SOPAC	Sonne	1987	Sample	Dredge	Dredge	140KD	SO48_140KD	-22.5533	-176.722	East Lau Basin
SO48	LAU BASIN HYDROTHERMALISM SOPAC	Sonne	1987	Sample	Dredge	Dredge	141KD	SO48_141KD	-22.5367	-176.72	East Lau Basin
SO48	LAU BASIN HYDROTHERMALISM SOPAC	Sonne	1987	Sample	Dredge	Dredge	142KD	SO48_142KD	-22.555	-176.724	East Lau Basin
SO48	LAU BASIN HYDROTHERMALISM SOPAC	Sonne	1987	Observation	Photo sledge	Photo sledge	143FS	SO48_143FS	-22.5567	-176.723	East Lau Basin
SO48	LAU BASIN HYDROTHERMALISM SOPAC	Sonne	1987	Sample	TV grab	TV grab	144GA	SO48_144GA	-22.6133	-176.737	East Lau Basin
SO48	LAU BASIN HYDROTHERMALISM SOPAC	Sonne	1987	Sample	TV grab	TV grab	145GA	SO48_145GA	-22.55	-176.719	East Lau Basin
SO48	LAU BASIN HYDROTHERMALISM SOPAC	Sonne	1987	Sample	Dredge	Dredge	146KD	SO48_146KD	-22.4383	-176.694	East Lau Basin
SO48	LAU BASIN HYDROTHERMALISM SOPAC	Sonne	1987	Sample	Dredge	Dredge	147KD	SO48_147KD	-22.4667	-176.548	East Lau Basin
SO48	LAU BASIN HYDROTHERMALISM SOPAC	Sonne	1987	Sediment	Sediment core	Piston core	148KL	SO48_148KL	-22.4833	-176.614	East Lau Basin
SO48	LAU BASIN HYDROTHERMALISM SOPAC	Sonne	1987	Sediment	Sediment core	Piston core	149KL	SO48_149KL	-22.3483	-176.579	East Lau Basin
SO48	LAU BASIN HYDROTHERMALISM SOPAC	Sonne	1987	Sediment	Sediment core	Piston core	150KL	SO48_150KL	-22.3483	-176.385	East Lau Basin
SO48	LAU BASIN HYDROTHERMALISM SOPAC	Sonne	1987	Sediment	Sediment core	Piston core	151KL	SO48_151KL	-22.31	-176.452	East Lau Basin
SO48	LAU BASIN HYDROTHERMALISM SOPAC	Sonne	1987	Sediment	Sediment core	Piston core	152KL	SO48_152KL	-22.255	-176.512	East Lau Basin
SO48	LAU BASIN HYDROTHERMALISM SOPAC	Sonne	1987	Sediment	Sediment core	Piston core	153KL	SO48_153KL	-22.4817	-176.908	West Lau Basin
SO48	LAU BASIN HYDROTHERMALISM SOPAC	Sonne	1987	Sediment	Sediment core	Piston core	154KL	SO48_154KL	-22.445	-176.957	West Lau Basin
SO48	LAU BASIN HYDROTHERMALISM SOPAC	Sonne	1987	Sediment	Sediment core	Piston core	155KL	SO48_155KL	-22.2333	-177.193	West Lau Basin
SO67/2	Lau Basin-Hydrothermalism	Sonne	1990	Sample	TV grab	TV grab	262GD	SO67-262GD	-22.2167	-176.606	East Lau Basin
SO67/2	Lau Basin-Hydrothermalism	Sonne	1990	Sediment	Sediment core	Piston core	156KL	SO67-156KL	-18.7	-176.672	East Lau Basin
SO67/2	Lau Basin-Hydrothermalism	Sonne	1990	Sample	Dredge	Dredge	157KD	SO67-157KD	-18.7933	-176.541	Central Lau Basin
SO67/2	Lau Basin-Hydrothermalism	Sonne	1990	Sediment	Sediment core	Piston core	159KL	SO67-159KL	-18.7017	-176.317	East Lau Basin
SO67/2	Lau Basin-Hydrothermalism	Sonne	1990	Sediment	Sediment core	Piston core	161KL	SO67-161KL	-18.7067	-176.65	East Lau Basin
SO67/2	Lau Basin-Hydrothermalism	Sonne	1990	Sample	Dredge	Dredge	162KD	SO67-162KD	-19.0217	-176.564	Central Lau Basin
SO67/2	Lau Basin-Hydrothermalism	Sonne	1990	Sediment	Sediment core	Piston core	163KL	SO67-163KL	-19.0792	-176.594	East Lau Basin
SO67/2	Lau Basin-Hydrothermalism	Sonne	1990	Sediment	Sediment core	Piston core	164KL	SO67-164KL	-19.0785	-176.526	East Lau Basin
SO67/2	Lau Basin-Hydrothermalism	Sonne	1990	Sample	TV grab	TV grab	165GA	SO67-165GA	-19.1112	-176.559	Central Lau Basin
SO67/2	Lau Basin-Hydrothermalism	Sonne	1990	Sample	Dredge	Dredge	166KD	SO67-166KD	-19.1683	-176.541	Central Lau Basin
SO67/2	Lau Basin-Hydrothermalism	Sonne	1990	Sample	Dredge	Dredge	167KD	SO67-167KD	-19.3333	-175.984	East Lau Basin
SO67/2	Lau Basin-Hydrothermalism	Sonne	1990	Sample	Dredge	Dredge	168KD	SO67-168KD	-19.335	-175.989	East Lau Basin
SO67/2	Lau Basin-Hydrothermalism	Sonne	1990	Sample	Dredge	Dredge	169KD	SO67-169KD	-19.325	-175.968	East Lau Basin
SO67/2	Lau Basin-Hydrothermalism	Sonne	1990	Sample	Dredge	Dredge	170KD	SO67-170KD	-19.3367	-175.972	East Lau Basin
SO67/2	Lau Basin-Hydrothermalism	Sonne	1990	Sediment	Sediment core	Piston core	172KL	SO67-172KL	-19.3317	-176.01	East Lau Basin
SO67/2	Lau Basin-Hydrothermalism	Sonne	1990	Sample	Dredge	Dredge	173KD	SO67-173KD	-19.475	-175.988	East Lau Basin
SO67/2	Lau Basin-Hydrothermalism	Sonne	1990	Observation	Photo sledge	Photo sledge	174FS	SO67-174FS	-19.3433	-175.937	East Lau Basin
SO67/2	Lau Basin-Hydrothermalism	Sonne	1990	Sediment	Sediment core	Piston core	175KL	SO67-175KL	-19.3333	-176.001	East Lau Basin
SO67/2	Lau Basin-Hydrothermalism	Sonne	1990	Sample	TV grab	TV grab	176GA	SO67-176GA	-19.325	-175.965	East Lau Basin
SO67/2	Lau Basin-Hydrothermalism	Sonne	1990	Sample	Dredge	Dredge	177KD	SO67-177KD	-19.2183	-176.156	East Lau Basin
SO67/2	Lau Basin-Hydrothermalism	Sonne	1990	Sample	TV grab	TV grab	178GA	SO67-178GA	-19.2333	-176.172	East Lau Basin
SO67/2	Lau Basin-Hydrothermalism	Sonne	1990	Observation	Photo sledge	Photo sledge	180FS	SO67-180FS	-18.76	-176.515	Central Lau Basin
SO67/2	Lau Basin-Hydrothermalism	Sonne	1990	Sediment	Sediment core	Piston core	181KL	SO67-181KL	-18.91	-176.625	Central Lau Basin
SO67/2	Lau Basin-Hydrothermalism	Sonne	1990	Observation	Photo sledge	Photo sledge	182FS	SO67-182FS	-18.83	-176.548	Central Lau Basin
SO67/2	Lau Basin-Hydrothermalism	Sonne	1990	Sample	TV grab	TV grab	183GA	SO67-183GA	-22.2117	-176.607	East Lau Basin
SO67/2	Lau Basin-Hydrothermalism	Sonne	1990	Sample	Dredge	Dredge	184KD	SO67-184KD	-22.215	-176.611	East Lau Basin
SO67/2	Lau Basin-Hydrothermalism	Sonne	1990	Sample	TV grab	TV grab	185GA	SO67-185GA	-22.2183	-176.598	East Lau Basin
SO67/2	Lau Basin-Hydrothermalism	Sonne	1990	Sample	Dredge	Dredge	186KD	SO67-186KD	-22.215	-176.601	East Lau Basin
SO67/2	Lau Basin-Hydrothermalism	Sonne	1990	Sample	Dredge	Dredge	187KD	SO67-187KD	-22.2167	-176.61	East Lau Basin
SO67/2	Lau Basin-Hydrothermalism	Sonne	1990	Sediment	Sediment core	Piston core	188KL	SO67-188KL	-22.29	-176.721	East Lau Basin
SO67/2	Lau Basin-Hydrothermalism	Sonne	1990	Sample	Dredge	Dredge	189KD	SO67-189KD	-22.2133	-176.602	East Lau Basin
SO67/2	Lau Basin-Hydrothermalism	Sonne	1990	Sediment	Sediment core	Piston core	190KL	SO67-190KL	-22.1367	-176.787	West Lau Basin
SO67/2	Lau Basin-Hydrothermalism	Sonne	1990	Sediment	Sediment core	Piston core	191KL	SO67-191KL	-22.1432	-176.723	West Lau Basin
SO67/2	Lau Basin-Hydrothermalism	Sonne	1990	Sample	Dredge	Dredge	192KD	SO67-192KD	-22.1625	-176.679	East Lau Basin
SO67/2	Lau Basin-Hydrothermalism	Sonne	1990	Sample	Dredge	Dredge	193KD	SO67-193KD	-22.1817	-176.676	East Lau Basin
SO67/2	Lau Basin-Hydrothermalism	Sonne	1990	Sample	Dredge	Dredge	194KD	SO67-194KD	-22.1317	-176.587	East Lau Basin
SO67/2	Lau Basin-Hydrothermalism	Sonne	1990	Sample	Dredge	Dredge	195KD	SO67-195KD	-22.153	-176.529	East Lau Basin
SO67/2	Lau Basin-Hydrothermalism	Sonne	1990	Sample	Dredge	Dredge	196KD	SO67-196KD	-22.1817	-176.556	East Lau Basin
SO67/2	Lau Basin-Hydrothermalism	Sonne	1990	Sample	Dredge	Dredge	197KD	SO67-197KD	-22.1783	-176.444	East Lau Basin
SO67/2	Lau Basin-Hydrothermalism	Sonne	1990	Sample	Dredge	Dredge	198KD	SO67-198KD	-22.1243	-176.41	East Lau Basin
SO67/2	Lau Basin-Hydrothermalism	Sonne	1990	Sample	Dredge	Dredge	199KD	SO67-199KD	-22.0832	-176.373	East Lau Basin
SO67/2	Lau Basin-Hydrothermalism	Sonne	1990	Sample	Dredge	Dredge	200KD	SO67-200KD	-22.0895	-176.374	East Lau Basin
SO67/2	Lau Basin-Hydrothermalism	Sonne	1990	Sample	Dredge	Dredge	201KD	SO67-201KD	-22.0878	-176.527	East Lau Basin
SO67/2	Lau Basin-Hydrothermalism	Sonne	1990	Sample	Dredge	Dredge	202KD	SO67-202KD	-22.0933	-176.595	East Lau Basin
SO67/2	Lau Basin-Hydrothermalism	Sonne	1990	Sample	Dredge	Dredge	203KD	SO67-203KD	-22.1063	-176.61	East Lau Basin
SO67/2	Lau Basin-Hydrothermalism	Sonne	1990	Sample	Dredge	Dredge	204KD	SO67-204KD	-21.9267	-176.533	East Lau Basin
SO67/2	Lau Basin-Hydrothermalism	Sonne	1990	Sample	Dredge	Dredge	205KD	SO67-205KD	-21.9617	-176.549	East Lau Basin
SO67/2	Lau Basin-Hydrothermalism	Sonne	1990	Sample	Dredge	Dredge	206KD	SO67-206KD	-21.99	-176.578	East Lau Basin
SO67/2	Lau Basin-Hydrothermalism	Sonne	1990	Sample	Dredge	Dredge	207KD	SO67-207KD	-22.0122	-176.569	East Lau Basin
SO67/2	Lau Basin-Hydrothermalism	Sonne	1990	Sample	Dredge	Dredge	208KD	SO67-208KD	-22.04	-176.593	East Lau Basin
SO67/2	Lau Basin-Hydrothermalism	Sonne	1990	Sample	Dredge	Dredge	209KD	SO67-209KD	-22.068	-176.601	East Lau Basin
SO67/2	Lau Basin-Hydrothermalism	Sonne	1990	Sample	Dredge	Dredge	210KD	SO67-210KD	-22.1252	-176.585	East Lau Basin
SO67/2	Lau Basin-Hydrothermalism	Sonne	1990	Sample	Dredge	Dredge	211KD	SO67-211KD	-22.18	-176.625	East Lau Basin
SO67/2	Lau Basin-Hydrothermalism	Sonne	1990	Sample	Dredge	Dredge	212KD	SO67-212KD	-22.2167	-176.609	East Lau Basin
SO67/2	Lau Basin-Hydrothermalism	Sonne	1990	Sample	Dredge	Dredge	213KD	SO67-213KD	-22.22	-176.61	East Lau Basin
SO67/2	Lau Basin-Hydrothermalism	Sonne	1990	Sample	TV grab	TV grab	214GA	SO67-214GA	-22.2133	-176.608	East Lau Basin
SO67/2	Lau Basin-Hydrothermalism	Sonne	1990	Sample	TV grab	TV grab	215GA	SO67-215GA	-22.2167	-176.61	East Lau Basin
SO67/2	Lau Basin-Hydrothermalism	Sonne	1990	Observation	Photo sledge	Photo sledge	216FS	SO67-216FS	-22.5283	-176.713	East Lau Basin
SO67/2	Lau Basin-Hydrothermalism	Sonne	1990	Sample	TV grab	TV grab	217GA	SO67-217GA	-22.5483	-176.718	East Lau Basin
SO67/2	Lau Basin-Hydrothermalism	Sonne	1990	Observation	Photo sledge	Photo sledge	218FS	SO67-218FS	-22.645	-176.718	East Lau Basin
SO67/2	Lau Basin-Hydrothermalism	Sonne	1990	Sample	TV grab	TV grab	219GA	SO67-219GA	-22.6667	-176.732	East Lau Basin
SO67/2	Lau Basin-Hydrothermalism	Sonne	1990	Sample	TV grab	TV grab	220GA	SO67-220GA	-22.665	-176.73	East Lau Basin
SO67/2	Lau Basin-Hydrothermalism	Sonne	1990	Sediment	Sediment core	Piston core	221KL	SO67-221KL	-22.5933	-176.874	West Lau Basin
SO67/2	Lau Basin-Hydrothermalism	Sonne	1990	Sediment	Sediment core	Piston core	222KL	SO67-222KL	-22.6917	-176.857	West Lau Basin
SO67/2	Lau Basin-Hydrothermalism	Sonne	1990	Sample	Dredge	Dredge	223KD	SO67-223KD	-22.645	-176.993	West Lau Basin
SO67/2	Lau Basin-Hydrothermalism	Sonne	1990	Observation	Photo sledge	Photo sledge	224FS	SO67-224FS	-22.6467	-176.985	West Lau Basin
SO67/2	Lau Basin-Hydrothermalism	Sonne	1990	Sample	TV grab	TV grab	225GA	SO67-225GA	-22.84	-176.779	East Lau Basin
SO67/2	Lau Basin-Hydrothermalism	Sonne	1990	Observation	Photo sledge	Photo sledge	226FS	SO67-226FS	-22.84	-176.78	East Lau Basin
SO67/2	Lau Basin-Hydrothermalism	Sonne	1990	Sample	TV grab	TV grab	227GA	SO67-227GA	-22.8217	-176.814	East Lau Basin
SO67/2	Lau Basin-Hydrothermalism	Sonne	1990	Sample	Dredge	Dredge	228KD	SO67-228KD	-22.8083	-176.858	West Lau Basin
SO67/2	Lau Basin-Hydrothermalism	Sonne	1990	Sediment	Sediment core	Piston core	229KL	SO67-229KL	-22.79	-176.876	West Lau Basin
SO67/2	Lau Basin-Hydrothermalism	Sonne	1990	Sample	Dredge	Dredge	230KD	SO67-230KD	-22.7933	-176.75	East Lau Basin
SO67/2	Lau Basin-Hydrothermalism	Sonne	1990	Observation	Photo sledge	Photo sledge	231FS	SO67-231FS	-22.7883	-176.753	East Lau Basin
SO67/2	Lau Basin-Hydrothermalism	Sonne	1990	Sample	TV grab	TV grab	232GA	SO67-232GA	-22.7867	-176.755	East Lau Basin
SO67/2	Lau Basin-Hydrothermalism	Sonne	1990	Sample	TV grab	TV grab	233GA	SO67-233GA	-22.7883	-176.755	East Lau Basin
SO67/2	Lau Basin-Hydrothermalism	Sonne	1990	Observation	Photo sledge	Photo sledge	234FS	SO67-234FS	-22.875	-176.697	East Lau Basin
SO67/2	Lau Basin-Hydrothermalism	Sonne	1990	Sample	TV grab	TV grab	235GA	SO67-235GA	-22.88	-176.694	East Lau Basin
SO67/2	Lau Basin-Hydrothermalism	Sonne	1990	Sediment	Sediment core	Gravity core	236SL	SO67-236SL	-22.695	-176.802	East Lau Basin
SO67/2	Lau Basin-Hydrothermalism	Sonne	1990	Observation	Photo sledge	Photo sledge	237FS	SO67-237FS	-22.6867	-176.74	East Lau Basin
SO67/2	Lau Basin-Hydrothermalism	Sonne	1990	Sample	TV grab	TV grab	238GA	SO67-238GA	-22.6767	-176.741	East Lau Basin
SO67/2	Lau Basin-Hydrothermalism	Sonne	1990	Sediment	Sediment core	Piston core	239KL	SO67-239KL	-22.6783	-176.854	West Lau Basin
SO67/2	Lau Basin-Hydrothermalism	Sonne	1990	Sample	Dredge	Dredge	240KD	SO67-240KD	-22.5183	-176.774	East Lau Basin
SO67/2	Lau Basin-Hydrothermalism	Sonne	1990	Observation	Photo sledge	Photo sledge	241FS	SO67-241FS	-22.54	-176.72	East Lau Basin
SO67/2	Lau Basin-Hydrothermalism	Sonne	1990	Sample	TV grab	TV grab	242GA	SO67-242GA	-22.5317	-176.718	East Lau Basin
SO67/2	Lau Basin-Hydrothermalism	Sonne	1990	Sample	TV grab	TV grab	244GA	SO67-244GA	-22.5283	-176.712	East Lau Basin
SO67/2	Lau Basin-Hydrothermalism	Sonne	1990	Observation	Photo sledge	Photo sledge	245FS	SO67-245FS	-22.5783	-176.729	East Lau Basin
SO67/2	Lau Basin-Hydrothermalism	Sonne	1990	Sample	TV grab	TV grab	246GA	SO67-246GA	-22.6	-176.736	East Lau Basin
SO67/2	Lau Basin-Hydrothermalism	Sonne	1990	Observation	Photo sledge	Photo sledge	247FS	SO67-247FS	-22.5433	-176.696	East Lau Basin
SO67/2	Lau Basin-Hydrothermalism	Sonne	1990	Sample	TV grab	TV grab	248GA	SO67-248GA	-22.5583	-176.692	East Lau Basin
SO67/2	Lau Basin-Hydrothermalism	Sonne	1990	Sample	Dredge	Dredge	249KD	SO67-249KD	-22.5117	-176.685	East Lau Basin
SO67/2	Lau Basin-Hydrothermalism	Sonne	1990	Sample	TV grab	TV grab	250GA	SO67-250GA	-22.55	-176.72	East Lau Basin
SO67/2	Lau Basin-Hydrothermalism	Sonne	1990	Observation	Photo sledge	Photo sledge	251FS	SO67-251FS	-22.53	-176.719	East Lau Basin
SO67/2	Lau Basin-Hydrothermalism	Sonne	1990	Sediment	Sediment core	Piston core	254KL	SO67-254KL	-22.5383	-176.893	West Lau Basin
SO67/2	Lau Basin-Hydrothermalism	Sonne	1990	Observation	Photo sledge	Photo sledge	256FS	SO67-256FS	-22.32	-176.652	East Lau Basin
SO67/2	Lau Basin-Hydrothermalism	Sonne	1990	Sediment	Sediment core	Piston core	258KL	SO67-258KL	-22.535	-176.708	East Lau Basin
SO67/2	Lau Basin-Hydrothermalism	Sonne	1990	Sediment	Sediment core	Piston core	259KL	SO67-259KL	-22.5367	-176.709	East Lau Basin
SO67/2	Lau Basin-Hydrothermalism	Sonne	1990	Observation	Photo sledge	Photo sledge	260FS	SO67-260FS	-22.2283	-176.613	East Lau Basin
SO67/2	Lau Basin-Hydrothermalism	Sonne	1990	Sample	TV grab	TV grab	252GD	SO67-252GD	-22.5517	-176.72	East Lau Basin
SO67/2	Lau Basin-Hydrothermalism	Sonne	1990	Sample	TV grab	TV grab	255GD	SO67-255GD	-22.535	-176.715	East Lau Basin
SO67/2	Lau Basin-Hydrothermalism	Sonne	1990	Sample	TV grab	TV grab	257GD	SO67-257GD	-22.5333	-176.708	East Lau Basin
SO67/2	Lau Basin-Hydrothermalism	Sonne	1990	Sample	TV grab	TV grab	261GD	SO67-261GD	-22.2183	-176.613	East Lau Basin
SO135	Havre Trough - Taupo Volcanic Zone: Tectonic, magmatic, and hydrothermal processes	Sonne	1998	Sample	TV grab	TV grab	15TVG	SO135-15TVG	-25.8926	-177.185	Tofua Arc
SO135	Havre Trough - Taupo Volcanic Zone: Tectonic, magmatic, and hydrothermal processes	Sonne	1998	Sample	Dredge	Dredge	01DR	SO135-01DR	-23.888	-177.157	East Lau Basin
SO135	Havre Trough - Taupo Volcanic Zone: Tectonic, magmatic, and hydrothermal processes	Sonne	1998	Sample	Dredge	Dredge	02DR	SO135-02DR	-23.9217	-177.117	East Lau Basin
SO135	Havre Trough - Taupo Volcanic Zone: Tectonic, magmatic, and hydrothermal processes	Sonne	1998	Sample	TV grab	TV grab	06GTV	SO135-06GTV	-23.89	-177.162	East Lau Basin
SO135	Havre Trough - Taupo Volcanic Zone: Tectonic, magmatic, and hydrothermal processes	Sonne	1998	Sample	TV grab	TV grab	08GTV	SO135-08GTV	-23.8706	-177.182	West Lau Basin
SO135	Havre Trough - Taupo Volcanic Zone: Tectonic, magmatic, and hydrothermal processes	Sonne	1998	Sample	Dredge	Dredge	09DR	SO135-09DR	-25.8934	-177.21	Tofua Arc
SO135	Havre Trough - Taupo Volcanic Zone: Tectonic, magmatic, and hydrothermal processes	Sonne	1998	Sample	Dredge	Dredge	10DR	SO135-10DR	-25.8923	-177.195	Tofua Arc
SO135	Havre Trough - Taupo Volcanic Zone: Tectonic, magmatic, and hydrothermal processes	Sonne	1998	Sample	Dredge	Dredge	11DR	SO135-11DR	-25.8501	-177.208	Tofua Arc
SO135	Havre Trough - Taupo Volcanic Zone: Tectonic, magmatic, and hydrothermal processes	Sonne	1998	Sample	Dredge	Dredge	12DR	SO135-12DR	-25.8362	-177.194	Tofua Arc
SO135	Havre Trough - Taupo Volcanic Zone: Tectonic, magmatic, and hydrothermal processes	Sonne	1998	Sample	Dredge	Dredge	13DR	SO135-13DR	-25.8742	-177.187	Tofua Arc
SO135	Havre Trough - Taupo Volcanic Zone: Tectonic, magmatic, and hydrothermal processes	Sonne	1998	Sample	Dredge	Dredge	14DR	SO135-14DR	-25.885	-177.186	Tofua Arc
SO135	Havre Trough - Taupo Volcanic Zone: Tectonic, magmatic, and hydrothermal processes	Sonne	1998	Sediment	Sediment core	Box core	03GKG	SO135-03GKG	-23.9265	-177.084	East Lau Basin
SO135	Havre Trough - Taupo Volcanic Zone: Tectonic, magmatic, and hydrothermal processes	Sonne	1998	Sediment	Sediment core	Box core	05GKG	SO135-05GKG	-23.8665	-177.113	East Lau Basin
SO135	Havre Trough - Taupo Volcanic Zone: Tectonic, magmatic, and hydrothermal processes	Sonne	1998	Sediment	Sediment core	Gravity core	04SL	SO135-04SL	-23.9264	-177.084	East Lau Basin
SO167	Louisville	Sonne	2002	Sample	Dredge	Dredge	85DR	SO167-85DR	-23.5703	-176.666	Tofua Arc
SO167	Louisville	Sonne	2002	Sample	Dredge	Dredge	27DR	SO167-27DR	-22.1252	-176.026	Tofua Arc
SO167	Louisville	Sonne	2002	Sample	Dredge	Dredge	29DR	SO167-29DR	-22.1655	-176.125	Tofua Arc
SO167	Louisville	Sonne	2002	Sample	Dredge	Dredge	42DR	SO167-42DR	-22.8298	-176.45	Tofua Arc
SO167	Louisville	Sonne	2002	Sample	Dredge	Dredge	40DR	SO167-40DR	-22.8282	-176.475	Tofua Arc
SO167	Louisville	Sonne	2002	Sample	Dredge	Dredge	12DR	SO167-12DR	-21.3555	-175.682	Tofua Arc
SO167	Louisville	Sonne	2002	Sample	Dredge	Dredge	17DR	SO167-17DR	-21.7233	-175.978	Tofua Arc
SO167	Louisville	Sonne	2002	Sample	Dredge	Dredge	04DR	SO167-04DR	-21.148	-175.767	Tofua Arc
SO167	Louisville	Sonne	2002	Sample	Dredge	Dredge	23DR	SO167-23DR	-22.0615	-176.224	Tofua Arc
SO167	Louisville	Sonne	2002	Sample	Dredge	Dredge	01DR	SO167-01DR	-21.0435	-175.85	Tofua Arc
SO167	Louisville	Sonne	2002	Sample	Dredge	Dredge	38DR	SO167-38DR	-22.7367	-176.402	Tofua Arc
SO167	Louisville	Sonne	2002	Sample	Dredge	Dredge	102DR	SO167-102DR	-24.872	-177.065	East Lau Basin
SO167	Louisville	Sonne	2002	Sample	Dredge	Dredge	20DR	SO167-20DR	-22.1502	-175.254	Tofua Arc
SO167	Louisville	Sonne	2002	Sample	Dredge	Dredge	13DR	SO167-13DR	-21.837	-175.974	Tofua Arc
SO167	Louisville	Sonne	2002	Sample	Dredge	Dredge	05DR	SO167-05DR	-21.1798	-175.757	Tofua Arc
SO167	Louisville	Sonne	2002	Sample	Dredge	Dredge	08DR	SO167-08DR	-21.335	-175.732	Tofua Arc
SO167	Louisville	Sonne	2002	Sample	Dredge	Dredge	30DR	SO167-30DR	-22.2298	-176.133	Tofua Arc
SO167	Louisville	Sonne	2002	Sample	Dredge	Dredge	26DR	SO167-26DR	-22.135	-176.015	Tofua Arc
SO167	Louisville	Sonne	2002	Sample	Dredge	Dredge	25DR	SO167-25DR	-22.0315	-176.045	Tofua Arc
SO167	Louisville	Sonne	2002	Sample	Dredge	Dredge	35DR	SO167-35DR	-22.6445	-176.426	Tofua Arc
SO167	Louisville	Sonne	2002	Sample	Dredge	Dredge	37DR	SO167-37DR	-22.7253	-176.393	Tofua Arc
SO167	Louisville	Sonne	2002	Sample	Dredge	Dredge	100DR	SO167-100DR	-24.805	-177.005	Tofua Arc
SO167	Louisville	Sonne	2002	Sample	Dredge	Dredge	93DR	SO167-93DR	-24.2088	-176.927	Tofua Arc
SO167	Louisville	Sonne	2002	Sample	Dredge	Dredge	43DR	SO167-43DR	-22.86	-176.43	Tofua Arc
SO167	Louisville	Sonne	2002	Sample	Dredge	Dredge	95DR	SO167-95DR	-24.4697	-176.908	Tofua Arc
SO167	Louisville	Sonne	2002	Sample	Dredge	Dredge	03DR	SO167-03DR	-21.1027	-175.722	Tofua Arc
SO167	Louisville	Sonne	2002	Sample	Dredge	Dredge	11DR	SO167-11DR	-21.2597	-175.645	Tofua Arc
SO167	Louisville	Sonne	2002	Sample	Dredge	Dredge	21DR	SO167-21DR	-22.1252	-176.22	Tofua Arc
SO167	Louisville	Sonne	2002	Sample	Dredge	Dredge	24DR	SO167-24DR	-22.0835	-176.088	Tofua Arc
SO167	Louisville	Sonne	2002	Sample	Dredge	Dredge	33DR	SO167-33DR	-22.3342	-176.094	Tofua Arc
SO167	Louisville	Sonne	2002	Sample	Dredge	Dredge	31DR	SO167-31DR	-22.3285	-176.121	Tofua Arc
SO167	Louisville	Sonne	2002	Sample	Dredge	Dredge	07DR	SO167-07DR	-21.3047	-175.7	Tofua Arc
SO167	Louisville	Sonne	2002	Sample	Dredge	Dredge	06DR	SO167-06DR	-21.3065	-175.707	Tofua Arc
SO167	Louisville	Sonne	2002	Sample	Dredge	Dredge	82DR	SO167-82DR	-23.5733	-176.719	Tofua Arc
SO167	Louisville	Sonne	2002	Sample	Dredge	Dredge	89DR	SO167-89DR	-23.8265	-176.807	Tofua Arc
SO167	Louisville	Sonne	2002	Observation	Video sled	OFOS	98OFOS	SO167-98OFOS	-24.6	-176.913	Tofua Arc
SO167	Louisville	Sonne	2002	Sample	Dredge	Dredge	18DR	SO167-18DR	-21.7305	-175.94	Tofua Arc
SO167	Louisville	Sonne	2002	Sample	Dredge	Dredge	19DR	SO167-19DR	-21.8182	-175.934	Tofua Arc
SO167	Louisville	Sonne	2002	Sample	Dredge	Dredge	81DR	SO167-81DR	-23.5717	-176.655	Tofua Arc
SO167	Louisville	Sonne	2002	Sample	Dredge	Dredge	83DR	SO167-83DR	-23.575	-176.664	Tofua Arc
SO167	Louisville	Sonne	2002	Sample	Dredge	Dredge	92DR	SO167-92DR	-24.157	-176.873	Tofua Arc
SO167	Louisville	Sonne	2002	Sample	Dredge	Dredge	91DR	SO167-91DR	-24.1833	-176.823	Tofua Arc
SO167	Louisville	Sonne	2002	Sample	Dredge	Dredge	97DR	SO167-97DR	-24.5632	-176.905	Tofua Arc
SO167	Louisville	Sonne	2002	Sample	Dredge	Dredge	96DR	SO167-96DR	-24.5665	-176.917	Tofua Arc
SO167	Louisville	Sonne	2002	Sample	Dredge	Dredge	22DR	SO167-22DR	-22.028	-176.292	East Lau Basin
SO167	Louisville	Sonne	2002	Sample	Dredge	Dredge	99DR	SO167-99DR	-24.7983	-177.012	Tofua Arc
SO167	Louisville	Sonne	2002	Sample	Dredge	Dredge	14DR	SO167-14DR	-21.7837	-175.932	Tofua Arc
SO167	Louisville	Sonne	2002	Sample	Dredge	Dredge	09DR	SO167-09DR	-21.1297	-175.728	Tofua Arc
SO167	Louisville	Sonne	2002	Sample	Dredge	Dredge	39DR	SO167-39DR	-22.8215	-176.417	Tofua Arc
SO167	Louisville	Sonne	2002	Sample	Dredge	Dredge	88DR	SO167-88DR	-23.885	-176.788	Tofua Arc
SO167	Louisville	Sonne	2002	Sample	Dredge	Dredge	32DR	SO167-32DR	-22.3598	-176.09	Tofua Arc
SO167	Louisville	Sonne	2002	Sample	Dredge	Dredge	80DR	SO167-80DR	-23.5618	-176.63	Tofua Arc
SO167	Louisville	Sonne	2002	Sample	Dredge	Dredge	86DR	SO167-86DR	-23.9037	-176.747	Tofua Arc
SO167	Louisville	Sonne	2002	Sample	Dredge	Dredge	87DR	SO167-87DR	-23.9053	-176.771	Tofua Arc
SO167	Louisville	Sonne	2002	Sample	Dredge	Dredge	36DR	SO167-36DR	-22.6247	-176.34	Tofua Arc
SO167	Louisville	Sonne	2002	Sample	Dredge	Dredge	15DR	SO167-15DR	-21.767	-175.944	Tofua Arc
SO167	Louisville	Sonne	2002	Sample	Dredge	Dredge	46DR	SO167-46DR	-22.2187	-176.609	East Lau Basin
SO167	Louisville	Sonne	2002	Sample	Dredge	Dredge	47DR	SO167-47DR	-22.2172	-176.61	East Lau Basin
SO167	Louisville	Sonne	2002	Sample	Dredge	Dredge	51DR	SO167-51DR	-22.2167	-176.61	East Lau Basin
[truncated: 842 more rows]
